# Supplementary material for: Exploration of spatial confinement and ligand effects for the oxygen reduction reaction on Fe–Nx embedded hole-graphene
Source: Royal Society of Chemistry journal article supplement (doi:10.1039/d2cp06057d), 2023-01-01
Supplement: d2cp06057d8.pdf [file d2cp06057d8.pdf]

## Supplementary Information for

### Exploration of spatial confinement and ligand effects for oxygen reduction reaction on Fe-N<sub>x</sub> embedded hole-graphene

Jing-Hua Guo<sup>\*,a</sup>, Hong-Bo Wang<sup>a</sup>, Hai-Ying Liu<sup>a</sup>, Gang Chen<sup>\*,b</sup>, and Ting-Ting Cao<sup>c</sup>

<sup>a</sup>Laboratory of Advanced Materials Physics and Nanodevices, School of Physics and Technology, University of Jinan, Jinan, Shandong 250022, China.

<sup>b</sup>School of Physics and Electronics, Shandong Normal University, Jinan, Shandong 250358, China.

<sup>c</sup>School of Information Engineering, Guangxi Polytechnic of Construction, Nanning, Guangxi, 530000, China.

#### 1. Computational details of the adsorption free energies

In the four-electron reduction pathway of ORR, the intermediates include \*O<sub>2</sub>, \*OOH, \*OH, and \*O. The adsorption free energies ( $\Delta G_{\text{ads}}$ ) of these intermediates were calculated relative to H<sub>2</sub>O and H<sub>2</sub> under conditions of  $T = 298.15$  K and  $\text{pH} = 0$  (vs. SHE) according to equations<sup>1,2</sup>:

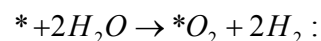

$$\Delta G_{*O_2} = G_{*O_2} + 2G_{H_2} - G_* - 2G_{H_2O} \quad (1)$$

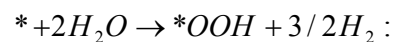

$$\Delta G_{*OOH} = G_{*OOH} + 3/2G_{H_2} - G_* - 2G_{H_2O} \quad (2)$$

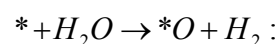

$$\Delta G_{*O} = G_{*O} + G_{H_2} - G_* - G_{H_2O} \quad (3)$$

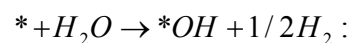

$$\Delta G_{*OH} = G_{*OH} + 1/2G_{H_2} - G_* - G_{H_2O} \quad (4)$$

where \* represents the Fe-TCPP and Fe-(mIM)<sub>n</sub> (n=2-3) adsorption sites. The  $G$  of each intermediate is calculated from the total DFT ground state energy ( $E_{\text{total}}$ ) corrected by the thermodynamic correction according to equation:

$$G = E_{\text{total}} + E_{\text{ZPE}} + \Delta H_{0 \rightarrow T} - TS \quad (5)$$

where  $E_{\text{ZPE}}$  is zero-point energy calculated from the DFT frequency analysis.  $\Delta H_{0 \rightarrow T}$  is defined as the enthalpy variation by temperature and calculated as  $\int_{0\text{K}}^{298\text{K}} C_p dT$  ( $C_p$  represents the heat capacities).  $S$  is the entropy at 298.15 K.

## 2. Computational details of the reaction free energy.

The reaction free energy ( $\Delta G$ ) of each ORR elemental step was calculated according to equation:

$$\Delta G = \Delta \Delta G_{\text{ads}} + \Delta G_{\text{pH}} + \Delta G_U \quad (6)$$

where  $\Delta G$  of each ORR elemental step was calculated based on the computational hydrogen electrode (CHE) model developed by Nørskov et al.<sup>3</sup>.  $\Delta \Delta G_{\text{ads}}$  is the adsorption free energy variation between the reactants and products according to equations (1)-(4).  $\Delta G_{\text{pH}} = -kT \ln[\text{H}^+] = \text{pH} \cdot kT \cdot \ln 10$  is used to correct the free energy of  $\text{H}^+ + \text{e}^-$  referenced by a standard hydrogen electrode (SHE) at various pH values.  $\Delta G_U = -neU$  is the free energy change resulting from an extra applied potential  $U$  vs. SHE.

The theoretical ORR overpotentials ( $\eta_{\text{ORR}}$ , vs. SHE) associated with different active sites were calculated according to equation

$$\eta_{\text{ORR}} = 1.23 \text{ V} + \Delta G_{\text{max}} \quad (7)$$

where 1.23 V is defined as the equilibrium potential of the overall 4-electron ORR at the standard state and  $\Delta G_{\text{max}}$  represents the most positive free energy variation associated with the proton-electron-transfer (PET) steps.

## 3. Construction of the model of Fe-N<sub>x</sub> embedded hole-graphene

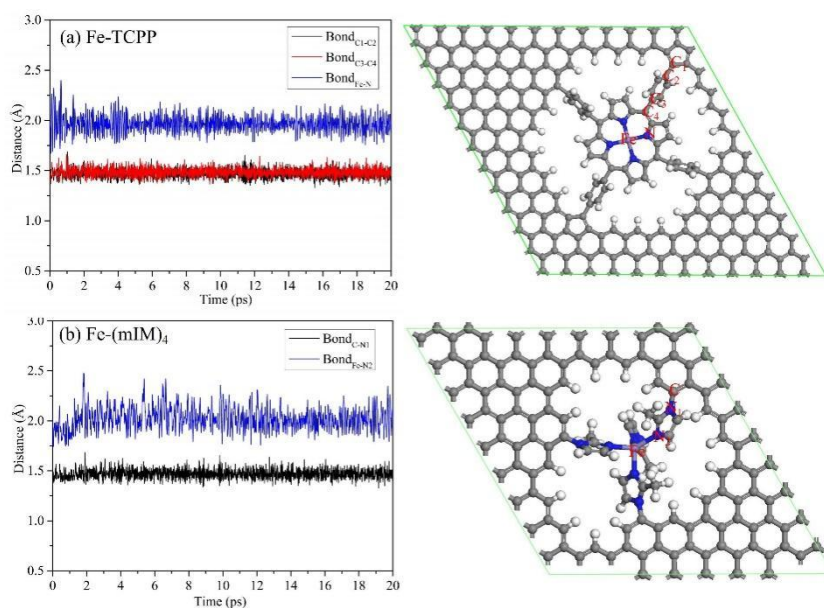

**Fig. S1.** The time evolution of the distances of the C-C bond, N-C bond, and Fe-C bond on Fe-TCPP and Fe-(mIM)<sub>4</sub> structures.

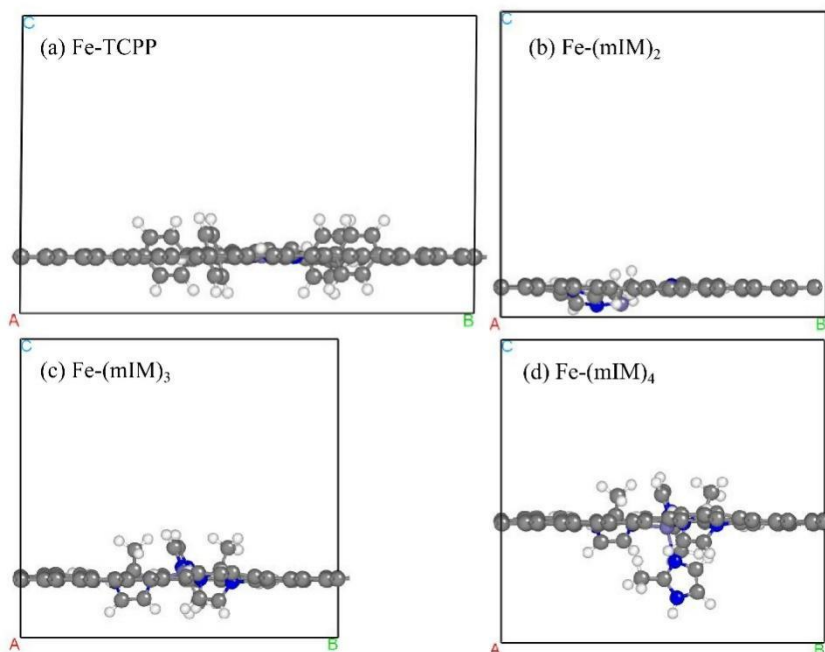

**Fig. S2.** Side views of the theoretical models of (a) Fe-TCPP, (b) Fe-(mIM)<sub>2</sub>, (c) Fe-(mIM)<sub>3</sub>, and (d) Fe-(mIM)<sub>4</sub>. The gray, white, blue, and light blue spheres represent C, H, N, and Fe atoms, respectively. To avoid interactions between the models and their periodic images, a vacuum space ( $>15\text{\AA}$ ) was applied along the C-direction in the simulated cells.

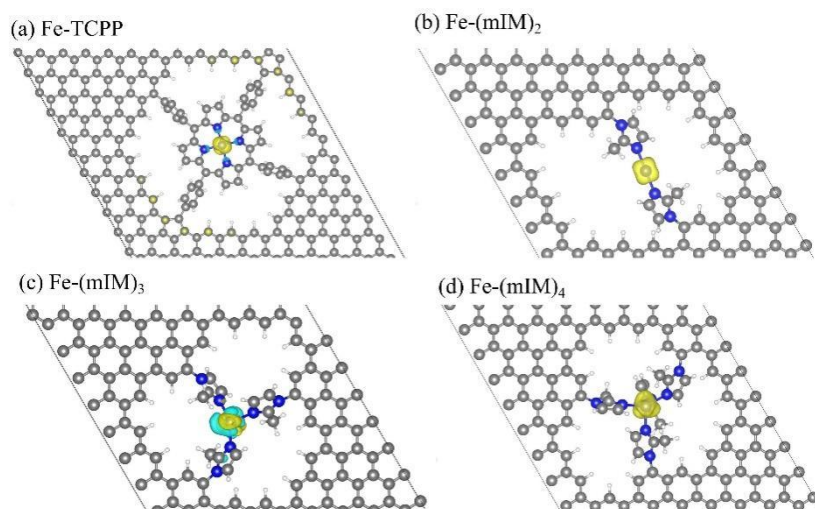

**Fig. S3.** The Spin density of (a) Fe-TCPP, (b) Fe-(mIM)<sub>2</sub>, (c) Fe-(mIM)<sub>3</sub> and (d) Fe-(mIM)<sub>4</sub> embedded hole-graphene, respectively. Yellow and light blue surfaces are spin-up and spin-down density, respectively.

#### 4. ORR reaction pathways and free-energy diagrams

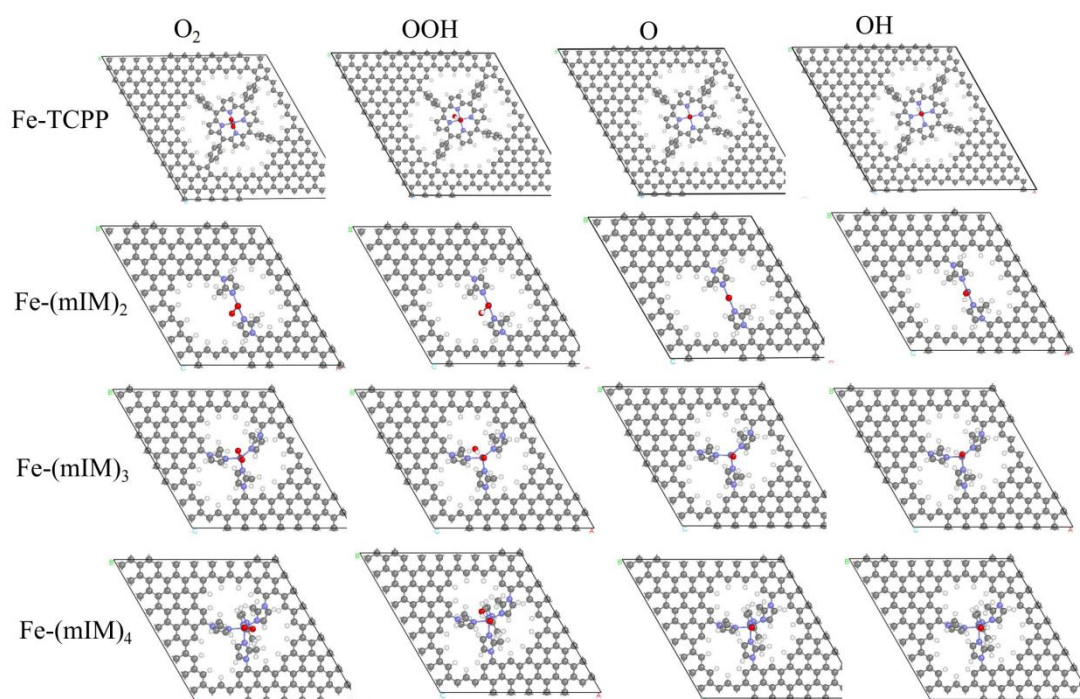

**Fig. S4.** The most stable adsorption structures of the key intermediates (\*O<sub>2</sub>, \*OOH, \*OH, and \*O) on Fe-TCPP, (c) Fe-(mIM)<sub>2</sub>, (d) Fe-(mIM)<sub>3</sub> and (e) Fe-(mIM)<sub>4</sub>, respectively. The gray, white, blue, light blue and red spheres represent C, H, N, Fe, and O atoms, respectively.

## 5. Exploring the impact of spatial confinement on ORR

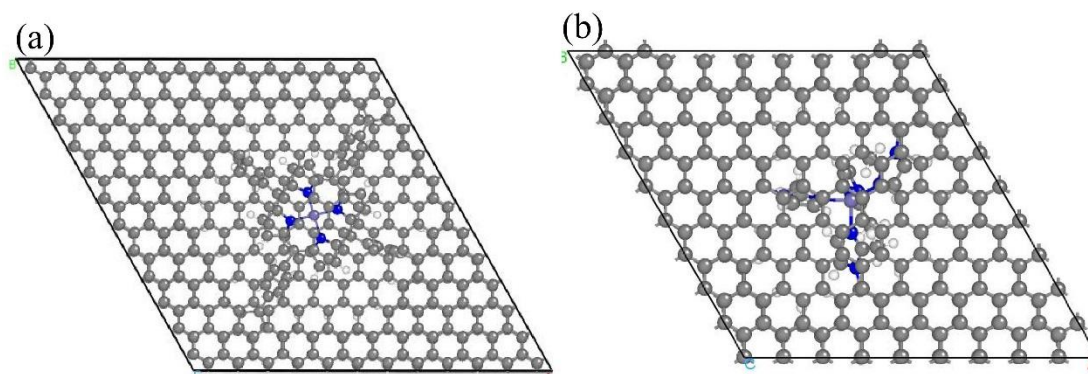

**Fig. S5.** Top view of the structure models used to simulate axial confinement. (a) Fe-TCPP and (b) Fe-(mIM)<sub>4</sub> active sites are on the underlying graphene layer, respectively. The gray, white, blue, and light blue spheres represent C, H, N, and Fe atoms, respectively.

## 6. Exploring the impact of axial ligand on ORR

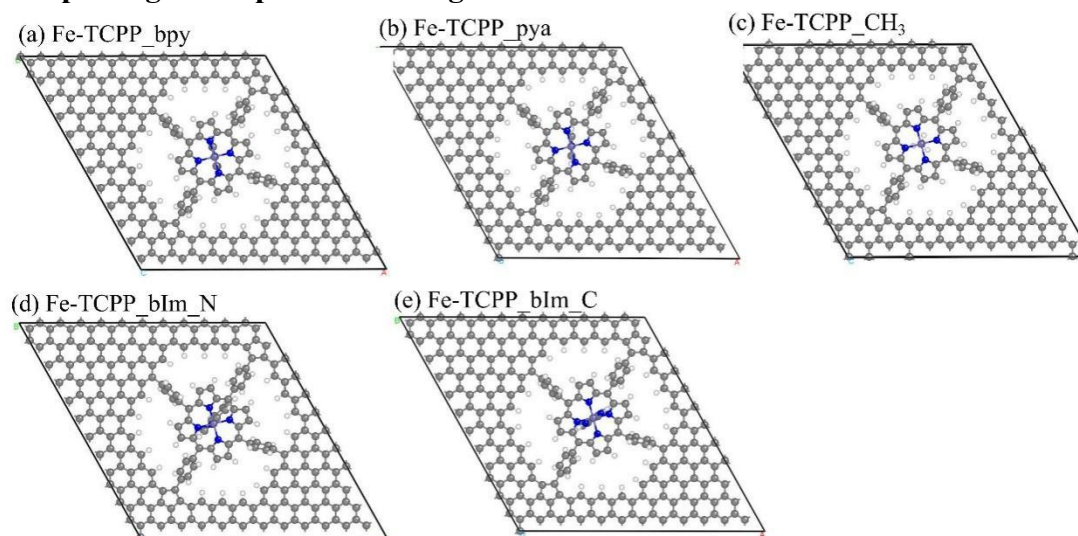

**Fig. S6.** Top view of the structure models of axial ligand decorated Fe-PCPP. The gray, white, blue, and light blue spheres represent C, H, N, and Fe atoms, respectively.

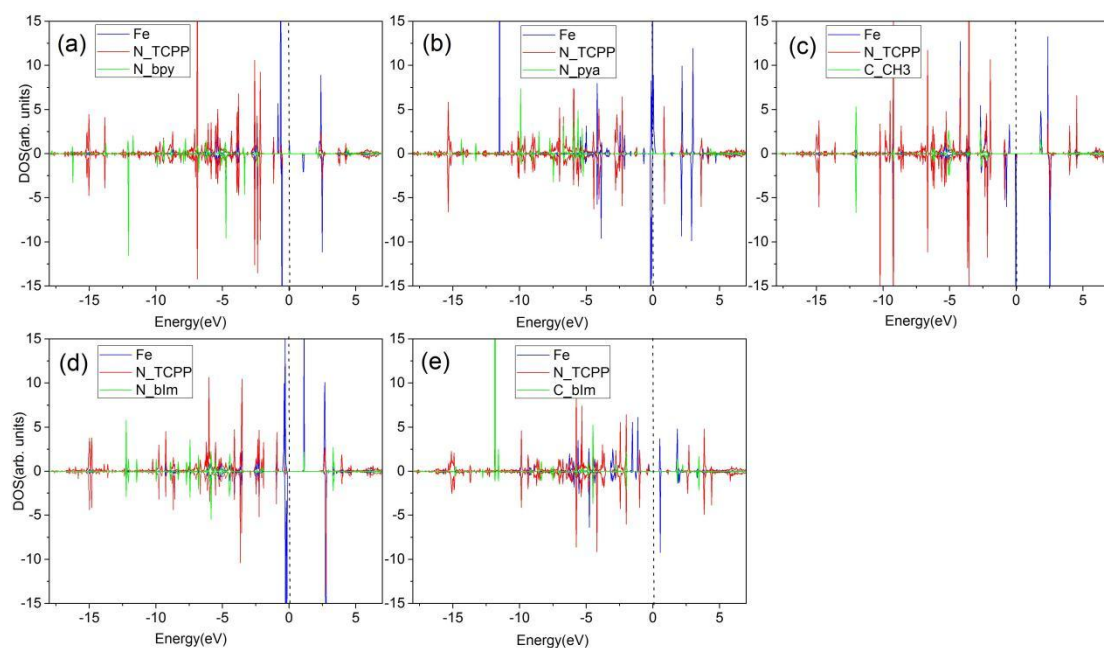

**Fig. S7.** The DOS of (a) Fe-TCPP\_bpy, (b) Fe-TCPP\_pya, (c) Fe-TCPP\_CH<sub>3</sub>, (d) Fe-TCPP\_bIm\_N and (e) Fe-TCPP\_bIm\_C structures. The dashed line indicates the Fermi energy level. The DOS of Fe (active site center) and the nearby N or C atoms are given in the figure.

## 7. The scaling relation and volcano plot

Table S1 Adsorption free energies (eV) of the key ORR intermediates (\*OOH, \*O, and \*OH) and overpotential ( $\eta_{\text{ORR}}$ ) on active sites.

| Structures                 | $\Delta G^{*OH}$ | $\Delta G^{*O}$ | $\Delta G^{*OOH}$ | $\eta_{\text{ORR}}$ |
|----------------------------|------------------|-----------------|-------------------|---------------------|
| Fe-TCPP                    | 0.94             | 1.56            | 4.01              | 0.61                |
| Fe-(mIM) <sub>4</sub>      | 0.52             | 0.85            | 3.59              | 0.89                |
| Fe-TCPP_5Å                 | 0.95             | 1.39            | 3.97              | 0.79                |
| Fe-TCPP_6Å                 | 0.61             | 1.28            | 3.71              | 0.62                |
| Fe-TCPP_7Å                 | 0.77             | 1.40            | 3.92              | 0.59                |
| Fe-TCPP_8Å                 | 0.73             | 1.66            | 3.93              | 0.50                |
| Fe-TCPP_9Å                 | 0.92             | 1.59            | 4.03              | 0.56                |
| Fe-TCPP_10Å                | 0.84             | 1.49            | 3.93              | 0.59                |
| Fe-TCPP_11Å                | 0.85             | 1.49            | 3.87              | 0.59                |
| Fe-TCPP_12Å                | 0.80             | 1.43            | 3.78              | 0.60                |
| Fe-TCPP_13Å                | 0.63             | 1.26            | 3.64              | 0.60                |
| Fe-TCPP_14Å                | 0.86             | 1.47            | 3.91              | 0.62                |
| Fe-(mIM) <sub>4</sub> _5Å  | 1.04             | 1.32            | 4.25              | 0.96                |
| Fe-(mIM) <sub>4</sub> _6Å  | 0.78             | 1.16            | 4.08              | 0.85                |
| Fe-(mIM) <sub>4</sub> _7Å  | 0.65             | 1.08            | 3.91              | 0.80                |
| Fe-(mIM) <sub>4</sub> _8Å  | 0.67             | 1.21            | 3.88              | 0.69                |
| Fe-(mIM) <sub>4</sub> _9Å  | 0.59             | 1.49            | 3.72              | 0.64                |
| Fe-(mIM) <sub>4</sub> _10Å | 0.60             | 0.91            | 3.67              | 0.92                |



|                            |      |      |      |      |
|----------------------------|------|------|------|------|
| Fe-(mIM) <sub>4</sub> _11Å | 0.63 | 1.01 | 3.68 | 0.85 |
| Fe-(mIM) <sub>4</sub> _12Å | 0.55 | 0.91 | 3.58 | 0.87 |
| Fe-(mIM) <sub>4</sub> _13Å | 0.54 | 0.92 | 3.60 | 0.86 |
| Fe-(mIM) <sub>4</sub> _14Å | 0.65 | 1.01 | 3.71 | 0.87 |
| Fe-TCPP_bpy                | 0.79 | 1.79 | 3.88 | 0.44 |
| Fe-TCPP_pya                | 0.81 | 1.82 | 3.92 | 0.42 |
| Fe-TCPP_CH <sub>3</sub>    | 1.24 | 2.74 | 4.49 | 0.80 |
| Fe-TCPP_bIm_C              | 0.95 | 1.55 | 3.69 | 0.62 |
| Fe-TCPP_bIm_N              | 1.14 | 2.31 | 4.14 | 0.45 |

## 8. Coordinates of the Fe-TCPP and Fe-(mIM)<sub>4</sub> embedded hole-graphene.

| Table S2 Fe-TCPP embedded hole-graphene |                           |      |                                                                  |      |                           |
|-----------------------------------------|---------------------------|------|------------------------------------------------------------------|------|---------------------------|
| Lattice parameters                      |                           |      | a = b = 29.52, c=18.0; $\alpha=\beta=90^\circ, \gamma=120^\circ$ |      |                           |
| atom                                    | x, y, z                   | atom | x, y, z                                                          | atom | x, y, z                   |
| C                                       | 0.00462, 0.00235, 0.17714 | C    | 0.02877, 0.47168, 0.17728                                        | C    | 0.92466, 0.92193, 0.18042 |
| C                                       | 0.03101, 0.05680, 0.17632 | C    | 0.08456, 0.41541, 0.17711                                        | C    | 0.94994, 0.97540, 0.17866 |
| C                                       | 0.08691, 0.00124, 0.17760 | C    | 0.11224, 0.47097, 0.17748                                        | C    | 0.67653, 0.64442, 0.18445 |
| C                                       | 0.11345, 0.05576, 0.17716 | C    | 0.16779, 0.41422, 0.17893                                        | C    | 0.63128, 0.64724, 0.17671 |
| C                                       | 0.16966, 0.00081, 0.17797 | C    | 0.19394, 0.46915, 0.17923                                        | C    | 0.80602, 0.75347, 0.12258 |
| C                                       | 0.19731, 0.05624, 0.17833 | C    | 0.83293, 0.41558, 0.18239                                        | C    | 0.72551, 0.59671, 0.20039 |
| C                                       | 0.25229, 0.00121, 0.17721 | C    | 0.86180, 0.47095, 0.18378                                        | C    | 0.81848, 0.78731, 0.18286 |
| C                                       | 0.27976, 0.05731, 0.17755 | C    | 0.91714, 0.41604, 0.17951                                        | C    | 0.86675, 0.83630, 0.18133 |
| C                                       | 0.33502, 0.99981, 0.17674 | C    | 0.94498, 0.47191, 0.17966                                        | C    | 0.78483, 0.77392, 0.24455 |
| C                                       | 0.36237, 0.05536, 0.17666 | C    | 0.00045, 0.49952, 0.17832                                        | C    | 0.67822, 0.59851, 0.19041 |
| C                                       | 0.41830, 0.99884, 0.17667 | C    | 0.02858, 0.55563, 0.17843                                        | C    | 0.73874, 0.72692, 0.24552 |
| C                                       | 0.44578, 0.05448, 0.17644 | C    | 0.08439, 0.49900, 0.17722                                        | C    | 0.72605, 0.69353, 0.18478 |
| C                                       | 0.50192, 0.99844, 0.17636 | C    | 0.11242, 0.55502, 0.17692                                        | C    | 0.75975, 0.70673, 0.12334 |
| C                                       | 0.52930, 0.05406, 0.17639 | C    | 0.16827, 0.49788, 0.17860                                        | C    | 0.63091, 0.69543, 0.16771 |
| C                                       | 0.58582, 0.99804, 0.17551 | C    | 0.19673, 0.55491, 0.17897                                        | C    | 0.44729, 0.41714, 0.18138 |
| C                                       | 0.61324, 0.05367, 0.17584 | C    | 0.91591, 0.49948, 0.18160                                        | C    | 0.49338, 0.41449, 0.17849 |
| C                                       | 0.66978, 0.99835, 0.17547 | C    | 0.94466, 0.55686, 0.18139                                        | C    | 0.31668, 0.30792, 0.11926 |
| C                                       | 0.69713, 0.05401, 0.17590 | C    | 0.00085, 0.58384, 0.17969                                        | C    | 0.39840, 0.46636, 0.19156 |
| C                                       | 0.75384, 0.99876, 0.17640 | C    | 0.02905, 0.63963, 0.17930                                        | C    | 0.30204, 0.27210, 0.17857 |
| C                                       | 0.78087, 0.05429, 0.17631 | C    | 0.08422, 0.58289, 0.17701                                        | C    | 0.25275, 0.22265, 0.17761 |
| C                                       | 0.83718, 0.99844, 0.17788 | C    | 0.11231, 0.63875, 0.17658                                        | C    | 0.33586, 0.28501, 0.23905 |
| C                                       | 0.86421, 0.05448, 0.17714 | C    | 0.16777, 0.58250, 0.17713                                        | C    | 0.44569, 0.46378, 0.18432 |
| C                                       | 0.92032, 0.00111, 0.17835 | C    | 0.19562, 0.63824, 0.17640                                        | C    | 0.38240, 0.33201, 0.24048 |
| C                                       | 0.94757, 0.05643, 0.17693 | C    | 0.25055, 0.58306, 0.18108                                        | C    | 0.39713, 0.36743, 0.18088 |
| C                                       | 0.00286, 0.08439, 0.17621 | C    | 0.27891, 0.63817, 0.18018                                        | C    | 0.36355, 0.35457, 0.12026 |
| C                                       | 0.03053, 0.13954, 0.17581 | C    | 0.91961, 0.58634, 0.18216                                        | C    | 0.49505, 0.36662, 0.17323 |
| C                                       | 0.08552, 0.08343, 0.17629 | C    | 0.94637, 0.64156, 0.18133                                        | C    | 0.49564, 0.60106, 0.18027 |
| C                                       | 0.11248, 0.13819, 0.17587 | C    | 0.00215, 0.66850, 0.18007                                        | C    | 0.54969, 0.62782, 0.17475 |
| C                                       | 0.16825, 0.08264, 0.17773 | C    | 0.02966, 0.72389, 0.17881                                        | C    | 0.43887, 0.68467, 0.11355 |
| C                                       | 0.19380, 0.13637, 0.17769 | C    | 0.08472, 0.66698, 0.17765                                        | C    | 0.41187, 0.51769, 0.19187 |
| C                                       | 0.25220, 0.08620, 0.17825 | C    | 0.11264, 0.72257, 0.17712                                        | C    | 0.44269, 0.71402, 0.17700 |
| C                                       | 0.27965, 0.14406, 0.17839 | C    | 0.16776, 0.66632, 0.17580                                        | C    | 0.46178, 0.70363, 0.24222 |
| C                                       | 0.33480, 0.08382, 0.17684 | C    | 0.19585, 0.72189, 0.17586                                        | C    | 0.46740, 0.54692, 0.18463 |
| C                                       | 0.36215, 0.13991, 0.17660 | C    | 0.25084, 0.66614, 0.17745                                        | C    | 0.47597, 0.66497, 0.24414 |

|   |                           |   |                           |   |                           |
|---|---------------------------|---|---------------------------|---|---------------------------|
| C | 0.41756, 0.08217, 0.17628 | C | 0.27919, 0.72158, 0.17675 | C | 0.47168, 0.63543, 0.18086 |
| C | 0.44484, 0.13794, 0.17598 | C | 0.33333, 0.66549, 0.18133 | C | 0.45307, 0.64600, 0.11542 |
| C | 0.50135, 0.08203, 0.17646 | C | 0.36254, 0.72035, 0.17828 | C | 0.58015, 0.68343, 0.16677 |
| C | 0.52840, 0.13809, 0.17612 | C | 0.91977, 0.67028, 0.18161 | C | 0.62998, 0.46265, 0.18098 |
| C | 0.58533, 0.08188, 0.17607 | C | 0.94593, 0.72504, 0.18040 | C | 0.57594, 0.43487, 0.17741 |
| C | 0.61286, 0.13722, 0.17639 | C | 0.00194, 0.75208, 0.17874 | C | 0.73256, 0.42893, 0.11774 |
| C | 0.66900, 0.08164, 0.17619 | C | 0.02916, 0.80725, 0.17755 | C | 0.71253, 0.54569, 0.19821 |
| C | 0.69656, 0.13711, 0.17667 | C | 0.08517, 0.75099, 0.17748 | C | 0.74370, 0.41133, 0.18388 |
| C | 0.75261, 0.08189, 0.17637 | C | 0.11296, 0.80633, 0.17662 | C | 0.71430, 0.40740, 0.24796 |
| C | 0.78008, 0.13741, 0.17681 | C | 0.16816, 0.75002, 0.17613 | C | 0.65720, 0.51649, 0.18782 |
| C | 0.83614, 0.08214, 0.17662 | C | 0.19612, 0.80558, 0.17599 | C | 0.67492, 0.42052, 0.24593 |
| C | 0.86357, 0.13778, 0.17644 | C | 0.25137, 0.74962, 0.17598 | C | 0.66407, 0.43845, 0.17991 |
| C | 0.91942, 0.08355, 0.17667 | C | 0.27935, 0.80509, 0.17605 | C | 0.69334, 0.44231, 0.11586 |
| C | 0.94705, 0.13894, 0.17610 | C | 0.33469, 0.74896, 0.17712 | C | 0.54615, 0.37931, 0.17254 |
| C | 0.00254, 0.16697, 0.17599 | C | 0.36267, 0.80428, 0.17664 | H | 0.83261, 0.76499, 0.07491 |
| C | 0.03107, 0.22206, 0.17608 | C | 0.41808, 0.74766, 0.17746 | H | 0.76350, 0.63042, 0.20814 |
| C | 0.08602, 0.16708, 0.17563 | C | 0.44604, 0.80277, 0.17728 | H | 0.79575, 0.80031, 0.29159 |
| C | 0.11623, 0.22197, 0.17606 | C | 0.91878, 0.75391, 0.18052 | H | 0.71226, 0.71542, 0.29326 |
| C | 0.16625, 0.16383, 0.17599 | C | 0.94350, 0.80826, 0.17905 | H | 0.74888, 0.68045, 0.07618 |
| C | 0.20068, 0.21791, 0.17565 | C | 0.00107, 0.83538, 0.17782 | H | 0.66526, 0.73339, 0.16258 |
| C | 0.24795, 0.17066, 0.17905 | C | 0.03145, 0.89037, 0.17752 | H | 0.29131, 0.29831, 0.07139 |
| C | 0.33392, 0.16788, 0.17752 | C | 0.08517, 0.83445, 0.17667 | H | 0.35984, 0.43277, 0.19665 |
| C | 0.41683, 0.16529, 0.17575 | C | 0.11395, 0.88975, 0.17678 | H | 0.32477, 0.25802, 0.28600 |
| C | 0.49981, 0.16403, 0.17572 | C | 0.16857, 0.83376, 0.17628 | H | 0.40768, 0.34165, 0.28848 |
| C | 0.58538, 0.16625, 0.17617 | C | 0.19677, 0.88919, 0.17633 | H | 0.37485, 0.38141, 0.07310 |
| C | 0.61347, 0.22009, 0.17612 | C | 0.25167, 0.83323, 0.17607 | H | 0.46112, 0.32829, 0.17013 |
| C | 0.66851, 0.16500, 0.17679 | C | 0.27965, 0.88875, 0.17647 | H | 0.42357, 0.69174, 0.06256 |
| C | 0.69639, 0.22021, 0.17755 | C | 0.33487, 0.83248, 0.17630 | H | 0.38670, 0.53475, 0.19650 |
| C | 0.75205, 0.16516, 0.17701 | C | 0.36293, 0.88797, 0.17658 | H | 0.46443, 0.72540, 0.29249 |
| C | 0.77976, 0.22073, 0.17752 | C | 0.41824, 0.83153, 0.17705 | H | 0.49134, 0.65789, 0.29508 |
| C | 0.83553, 0.16543, 0.17667 | C | 0.44641, 0.88695, 0.17663 | H | 0.45054, 0.62427, 0.06521 |
| C | 0.86317, 0.22105, 0.17708 | C | 0.50134, 0.83151, 0.17633 | H | 0.56445, 0.70958, 0.16086 |
| C | 0.91901, 0.16627, 0.17628 | C | 0.52970, 0.88552, 0.17611 | H | 0.75420, 0.43112, 0.06705 |
| C | 0.94681, 0.22158, 0.17654 | C | 0.61637, 0.88884, 0.17623 | H | 0.73791, 0.52907, 0.20366 |
| C | 0.00252, 0.24938, 0.17646 | C | 0.70023, 0.88880, 0.17806 | H | 0.72192, 0.39293, 0.29951 |
| C | 0.02968, 0.30461, 0.17667 | C | 0.78404, 0.88800, 0.18005 | H | 0.65318, 0.41824, 0.29655 |
| C | 0.08726, 0.24941, 0.17646 | C | 0.87068, 0.88749, 0.18231 | H | 0.68582, 0.45701, 0.06446 |
| C | 0.11375, 0.30436, 0.17743 | C | 0.91804, 0.84059, 0.17879 | H | 0.56281, 0.35374, 0.16930 |
| C | 0.17409, 0.24950, 0.17637 | C | 0.95226, 0.89459, 0.17874 | H | 0.67324, 0.32293, 0.17757 |
| C | 0.19790, 0.30373, 0.17781 | C | 0.00573, 0.91992, 0.17790 | H | 0.59359, 0.24291, 0.17569 |
| C | 0.66848, 0.24834, 0.17726 | C | 0.03251, 0.97466, 0.17755 | H | 0.51958, 0.20641, 0.17499 |
| C | 0.69573, 0.30274, 0.17842 | C | 0.08671, 0.91787, 0.17726 | H | 0.43860, 0.20780, 0.17528 |
| C | 0.75176, 0.24851, 0.17821 | C | 0.11454, 0.97315, 0.17783 | H | 0.35668, 0.21029, 0.17752 |
| C | 0.77913, 0.30395, 0.17961 | C | 0.16932, 0.91733, 0.17674 | H | 0.83925, 0.49112, 0.18609 |
| C | 0.83515, 0.24885, 0.17780 | C | 0.19711, 0.97284, 0.17745 | H | 0.87725, 0.56704, 0.18301 |
| C | 0.86259, 0.30445, 0.17881 | C | 0.25205, 0.91698, 0.17639 | H | 0.87726, 0.64917, 0.18245 |
| C | 0.91864, 0.24919, 0.17682 | C | 0.27978, 0.97272, 0.17673 | H | 0.87639, 0.73185, 0.18173 |
| C | 0.94612, 0.30474, 0.17720 | C | 0.33509, 0.91611, 0.17671 | H | 0.76209, 0.84557, 0.18118 |
| C | 0.00159, 0.33247, 0.17679 | C | 0.36280, 0.97161, 0.17668 | H | 0.67913, 0.84630, 0.17894 |
| C | 0.02895, 0.38795, 0.17686 | C | 0.41848, 0.91526, 0.17667 | H | 0.59694, 0.84644, 0.17655 |
| C | 0.08525, 0.33191, 0.17724 | C | 0.44617, 0.97075, 0.17669 | H | 0.52155, 0.80896, 0.17554 |
| C | 0.11213, 0.38712, 0.17765 | C | 0.50222, 0.91469, 0.17643 | H | 0.35350, 0.64304, 0.18440 |
| C | 0.16980, 0.33173, 0.17855 | C | 0.52976, 0.97008, 0.17605 | H | 0.27331, 0.56310, 0.18311 |
| C | 0.19526, 0.38640, 0.17960 | C | 0.58705, 0.91408, 0.17565 | H | 0.23630, 0.48886, 0.17998 |
| C | 0.75059, 0.33179, 0.18063 | C | 0.61401, 0.97031, 0.17552 | H | 0.23772, 0.40817, 0.18058 |
| C | 0.77784, 0.38730, 0.18294 | C | 0.67153, 0.91545, 0.17662 | H | 0.24028, 0.32653, 0.17857 |



|   |                           |   |                           |    |                           |
|---|---------------------------|---|---------------------------|----|---------------------------|
| C | 0.83443, 0.33215, 0.17994 | C | 0.69850, 0.97127, 0.17605 | Fe | 0.56212, 0.53110, 0.18111 |
| C | 0.86172, 0.38778, 0.18051 | C | 0.75508, 0.91505, 0.17820 | N  | 0.63598, 0.54917, 0.18485 |
| C | 0.91809, 0.33261, 0.17809 | C | 0.78206, 0.97109, 0.17726 | N  | 0.48829, 0.51352, 0.18144 |
| C | 0.94547, 0.38822, 0.17823 | C | 0.83840, 0.91289, 0.18077 | N  | 0.58143, 0.60549, 0.17889 |
| C | 0.00097, 0.41593, 0.17723 | C | 0.86540, 0.97049, 0.17923 | N  | 0.54329, 0.45660, 0.18019 |

| Table S3 Fe-(mIM) <sub>4</sub> embeded hole-graphene |                           |                                                                  |                           |      |                           |
|------------------------------------------------------|---------------------------|------------------------------------------------------------------|---------------------------|------|---------------------------|
| Lattice parameters                                   |                           | a = b = 22.14, c=20.0; $\alpha=\beta=90^\circ, \gamma=120^\circ$ |                           |      |                           |
| atom                                                 | x, y, z                   | atom                                                             | x, y, z                   | atom | x, y, z                   |
| C                                                    | 0.99519, 0.99901, 0.36013 | C                                                                | 0.14718, 0.63056, 0.35969 | C    | 0.42649, 0.30897, 0.29921 |
| C                                                    | 0.03263, 0.07326, 0.35958 | C                                                                | 0.22168, 0.55677, 0.36632 | C    | 0.44378, 0.49768, 0.43988 |
| C                                                    | 0.10591, 0.99813, 0.36248 | C                                                                | 0.25841, 0.63094, 0.36454 | C    | 0.42638, 0.53556, 0.34512 |
| C                                                    | 0.14356, 0.07220, 0.36432 | C                                                                | 0.89042, 0.55695, 0.38104 | C    | 0.42561, 0.55500, 0.27397 |
| C                                                    | 0.21752, 0.99870, 0.36395 | C                                                                | 0.92571, 0.63015, 0.37950 | C    | 0.76432, 0.62647, 0.29903 |
| C                                                    | 0.25376, 0.07252, 0.36899 | C                                                                | 0.99904, 0.66707, 0.36825 | C    | 0.70441, 0.56356, 0.30357 |
| C                                                    | 0.32973, 0.00046, 0.36232 | C                                                                | 0.03427, 0.74058, 0.36397 | C    | 0.70025, 0.62804, 0.38431 |
| C                                                    | 0.36640, 0.07463, 0.36579 | C                                                                | 0.10999, 0.66742, 0.35997 | C    | 0.67928, 0.65012, 0.44624 |
| C                                                    | 0.44154, 0.00236, 0.35839 | C                                                                | 0.14611, 0.74127, 0.35879 | C    | 0.50874, 0.35458, 0.37786 |
| C                                                    | 0.47846, 0.07694, 0.35852 | C                                                                | 0.22104, 0.66776, 0.36037 | C    | 0.55374, 0.36052, 0.43566 |
| C                                                    | 0.55307, 0.00343, 0.35499 | C                                                                | 0.25753, 0.74182, 0.35918 | C    | 0.59632, 0.60676, 0.15117 |
| C                                                    | 0.58981, 0.07740, 0.35398 | C                                                                | 0.33230, 0.66838, 0.36792 | C    | 0.58266, 0.60190, 0.21832 |
| C                                                    | 0.66404, 0.00335, 0.35350 | C                                                                | 0.36926, 0.74323, 0.36360 | C    | 0.57718, 0.50389, 0.18996 |
| C                                                    | 0.70112, 0.07755, 0.35348 | C                                                                | 0.88934, 0.66680, 0.38427 | C    | 0.57282, 0.43450, 0.19143 |
| C                                                    | 0.77482, 0.00216, 0.35365 | C                                                                | 0.92119, 0.73799, 0.37105 | H    | 0.35049, 0.49204, 0.49075 |
| C                                                    | 0.81199, 0.07618, 0.35367 | C                                                                | 0.99585, 0.77645, 0.36441 | H    | 0.45818, 0.61118, 0.26414 |
| C                                                    | 0.88463, 0.99989, 0.35622 | C                                                                | 0.03229, 0.85026, 0.36142 | H    | 0.37195, 0.54019, 0.26039 |
| C                                                    | 0.92182, 0.07387, 0.35587 | C                                                                | 0.10843, 0.77776, 0.35973 | H    | 0.44350, 0.52755, 0.24107 |
| C                                                    | 0.99594, 0.11061, 0.35752 | C                                                                | 0.14459, 0.85149, 0.35927 | H    | 0.43590, 0.41053, 0.27443 |
| C                                                    | 0.03307, 0.18457, 0.35736 | C                                                                | 0.22022, 0.77846, 0.35787 | H    | 0.38734, 0.26855, 0.26778 |
| C                                                    | 0.10705, 0.11101, 0.36109 | C                                                                | 0.25663, 0.85255, 0.35795 | H    | 0.46843, 0.47936, 0.47507 |
| C                                                    | 0.14249, 0.18341, 0.35927 | C                                                                | 0.33155, 0.77951, 0.36008 | H    | 0.80826, 0.64595, 0.26526 |
| C                                                    | 0.21559, 0.10687, 0.36947 | C                                                                | 0.36814, 0.85361, 0.35846 | H    | 0.65157, 0.67874, 0.43619 |
| C                                                    | 0.32864, 0.11039, 0.37035 | C                                                                | 0.44172, 0.78181, 0.36208 | H    | 0.72525, 0.68401, 0.47672 |
| C                                                    | 0.44069, 0.11313, 0.36258 | C                                                                | 0.47854, 0.85409, 0.35815 | H    | 0.64408, 0.60356, 0.47543 |
| C                                                    | 0.55255, 0.11454, 0.35488 | C                                                                | 0.59086, 0.85676, 0.35308 | H    | 0.53018, 0.31152, 0.46395 |
| C                                                    | 0.58898, 0.18919, 0.35267 | C                                                                | 0.70003, 0.85537, 0.35365 | H    | 0.60620, 0.37218, 0.42019 |
| C                                                    | 0.66420, 0.11467, 0.35328 | C                                                                | 0.81006, 0.85185, 0.35631 | H    | 0.56002, 0.40285, 0.46871 |
| C                                                    | 0.70149, 0.18876, 0.35264 | C                                                                | 0.88230, 0.77441, 0.36403 | H    | 0.68823, 0.51761, 0.27298 |
| C                                                    | 0.77525, 0.11360, 0.35348 | C                                                                | 0.91977, 0.84909, 0.36160 | H    | 0.57763, 0.28014, 0.34926 |
| C                                                    | 0.81266, 0.18735, 0.35361 | C                                                                | 0.99466, 0.88703, 0.36210 | H    | 0.67817, 0.33065, 0.34973 |
| C                                                    | 0.88585, 0.11212, 0.35440 | C                                                                | 0.03159, 0.96091, 0.36142 | H    | 0.78605, 0.43678, 0.35471 |
| C                                                    | 0.92333, 0.18615, 0.35482 | C                                                                | 0.10656, 0.88754, 0.36046 | H    | 0.83429, 0.52974, 0.38934 |
| C                                                    | 0.99752, 0.22280, 0.35659 | C                                                                | 0.14340, 0.96161, 0.36204 | H    | 0.83446, 0.63659, 0.39678 |
| C                                                    | 0.03567, 0.29692, 0.35804 | C                                                                | 0.21889, 0.88892, 0.35892 | H    | 0.56415, 0.80005, 0.35264 |
| C                                                    | 0.10741, 0.22138, 0.35820 | C                                                                | 0.25554, 0.96272, 0.36162 | H    | 0.47064, 0.75424, 0.36351 |
| C                                                    | 0.14415, 0.29464, 0.35921 | C                                                                | 0.33061, 0.89020, 0.35815 | H    | 0.42386, 0.65821, 0.38346 |
| C                                                    | 0.66516, 0.22724, 0.35122 | C                                                                | 0.36728, 0.96429, 0.35940 | H    | 0.25020, 0.41833, 0.37382 |
| C                                                    | 0.70384, 0.29956, 0.35047 | C                                                                | 0.44205, 0.89156, 0.35793 | H    | 0.20092, 0.32058, 0.35975 |
| C                                                    | 0.77569, 0.22466, 0.35332 | C                                                                | 0.47874, 0.96596, 0.35694 | H    | 0.19926, 0.21340, 0.35953 |

|   |                           |   |                           |    |                           |
|---|---------------------------|---|---------------------------|----|---------------------------|
| C | 0.81387, 0.29842, 0.35411 | C | 0.55382, 0.89186, 0.35479 | H  | 0.24321, 0.16322, 0.37336 |
| C | 0.88681, 0.22357, 0.35433 | C | 0.59017, 0.96632, 0.35416 | H  | 0.33796, 0.21232, 0.37378 |
| C | 0.92483, 0.29760, 0.35576 | C | 0.66377, 0.89214, 0.35304 | H  | 0.66887, 0.79866, 0.35471 |
| C | 0.99888, 0.33414, 0.35762 | C | 0.70108, 0.96644, 0.35335 | H  | 0.71854, 0.75040, 0.34507 |
| C | 0.03626, 0.40847, 0.35934 | C | 0.77231, 0.88940, 0.35460 | H  | 0.60772, 0.64772, 0.11516 |
| C | 0.11039, 0.33305, 0.36030 | C | 0.81067, 0.96390, 0.35458 | H  | 0.61432, 0.43452, 0.16130 |
| C | 0.14864, 0.40874, 0.36375 | C | 0.88391, 0.88776, 0.35925 | H  | 0.52252, 0.39219, 0.17321 |
| C | 0.77711, 0.33601, 0.35293 | C | 0.92150, 0.96232, 0.35870 | H  | 0.57854, 0.42157, 0.24310 |
| C | 0.81506, 0.40902, 0.35620 | C | 0.36570, 0.18348, 0.37059 | H  | 0.58086, 0.63989, 0.25121 |
| C | 0.88788, 0.33487, 0.35611 | C | 0.47769, 0.18792, 0.35967 | H  | 0.60004, 0.53105, 0.08771 |
| C | 0.92493, 0.40869, 0.35925 | C | 0.43689, 0.22141, 0.36283 | N  | 0.37459, 0.52705, 0.38835 |
| C | 0.99924, 0.44527, 0.36010 | C | 0.55061, 0.22358, 0.35311 | N  | 0.50361, 0.40720, 0.35073 |
| C | 0.03638, 0.51962, 0.36101 | C | 0.22115, 0.44595, 0.36998 | N  | 0.46246, 0.29326, 0.34657 |
| C | 0.11078, 0.44525, 0.36171 | C | 0.25856, 0.51905, 0.37180 | N  | 0.47031, 0.51928, 0.37584 |
| C | 0.14760, 0.51934, 0.36263 | C | 0.33254, 0.55905, 0.37863 | N  | 0.76194, 0.66729, 0.35029 |
| C | 0.88703, 0.44521, 0.36173 | C | 0.36754, 0.63071, 0.37659 | N  | 0.66348, 0.56493, 0.35572 |
| C | 0.92491, 0.52022, 0.36932 | C | 0.80829, 0.74110, 0.35776 | N  | 0.59241, 0.54445, 0.13404 |
| C | 0.99923, 0.55643, 0.36428 | C | 0.77463, 0.77917, 0.35317 | N  | 0.57023, 0.53791, 0.24205 |
| C | 0.03601, 0.63027, 0.36395 | C | 0.38497, 0.50251, 0.44843 | Fe | 0.55700, 0.51271, 0.34369 |
| C | 0.11025, 0.55640, 0.36050 | C | 0.45138, 0.37878, 0.30291 |    |                           |

## REFERENCES

- 1 S. Wannakao, T. Maihom, K. Kongpatpanich, J. Limtrakul and V. Promarak, *Phys. Chem. Chem. Phys.*, 2017, **19**, 29540-29548.
- 2 W. Liang, J. Chen, Y. Liu and S. Chen, *ACS Catal.*, 2014, **4**, 4170-4177.
- 3 J. K. Nørskov, J. Rossmeisl, A. Logadottir, L. Lindqvist, J. R. Kitchin, T. Bligaard and H. Jónsson, *J. Phys. Chem. B*, 2004, **108**, 17886-17892.
