# Supplementary figures and images for: Exploration of spatial confinement and ligand effects for the oxygen reduction reaction on Fe–Nx embedded hole-graphene
Source: Royal Society of Chemistry journal article supplement (doi:10.1039/d2cp06057d), 2023-01-01

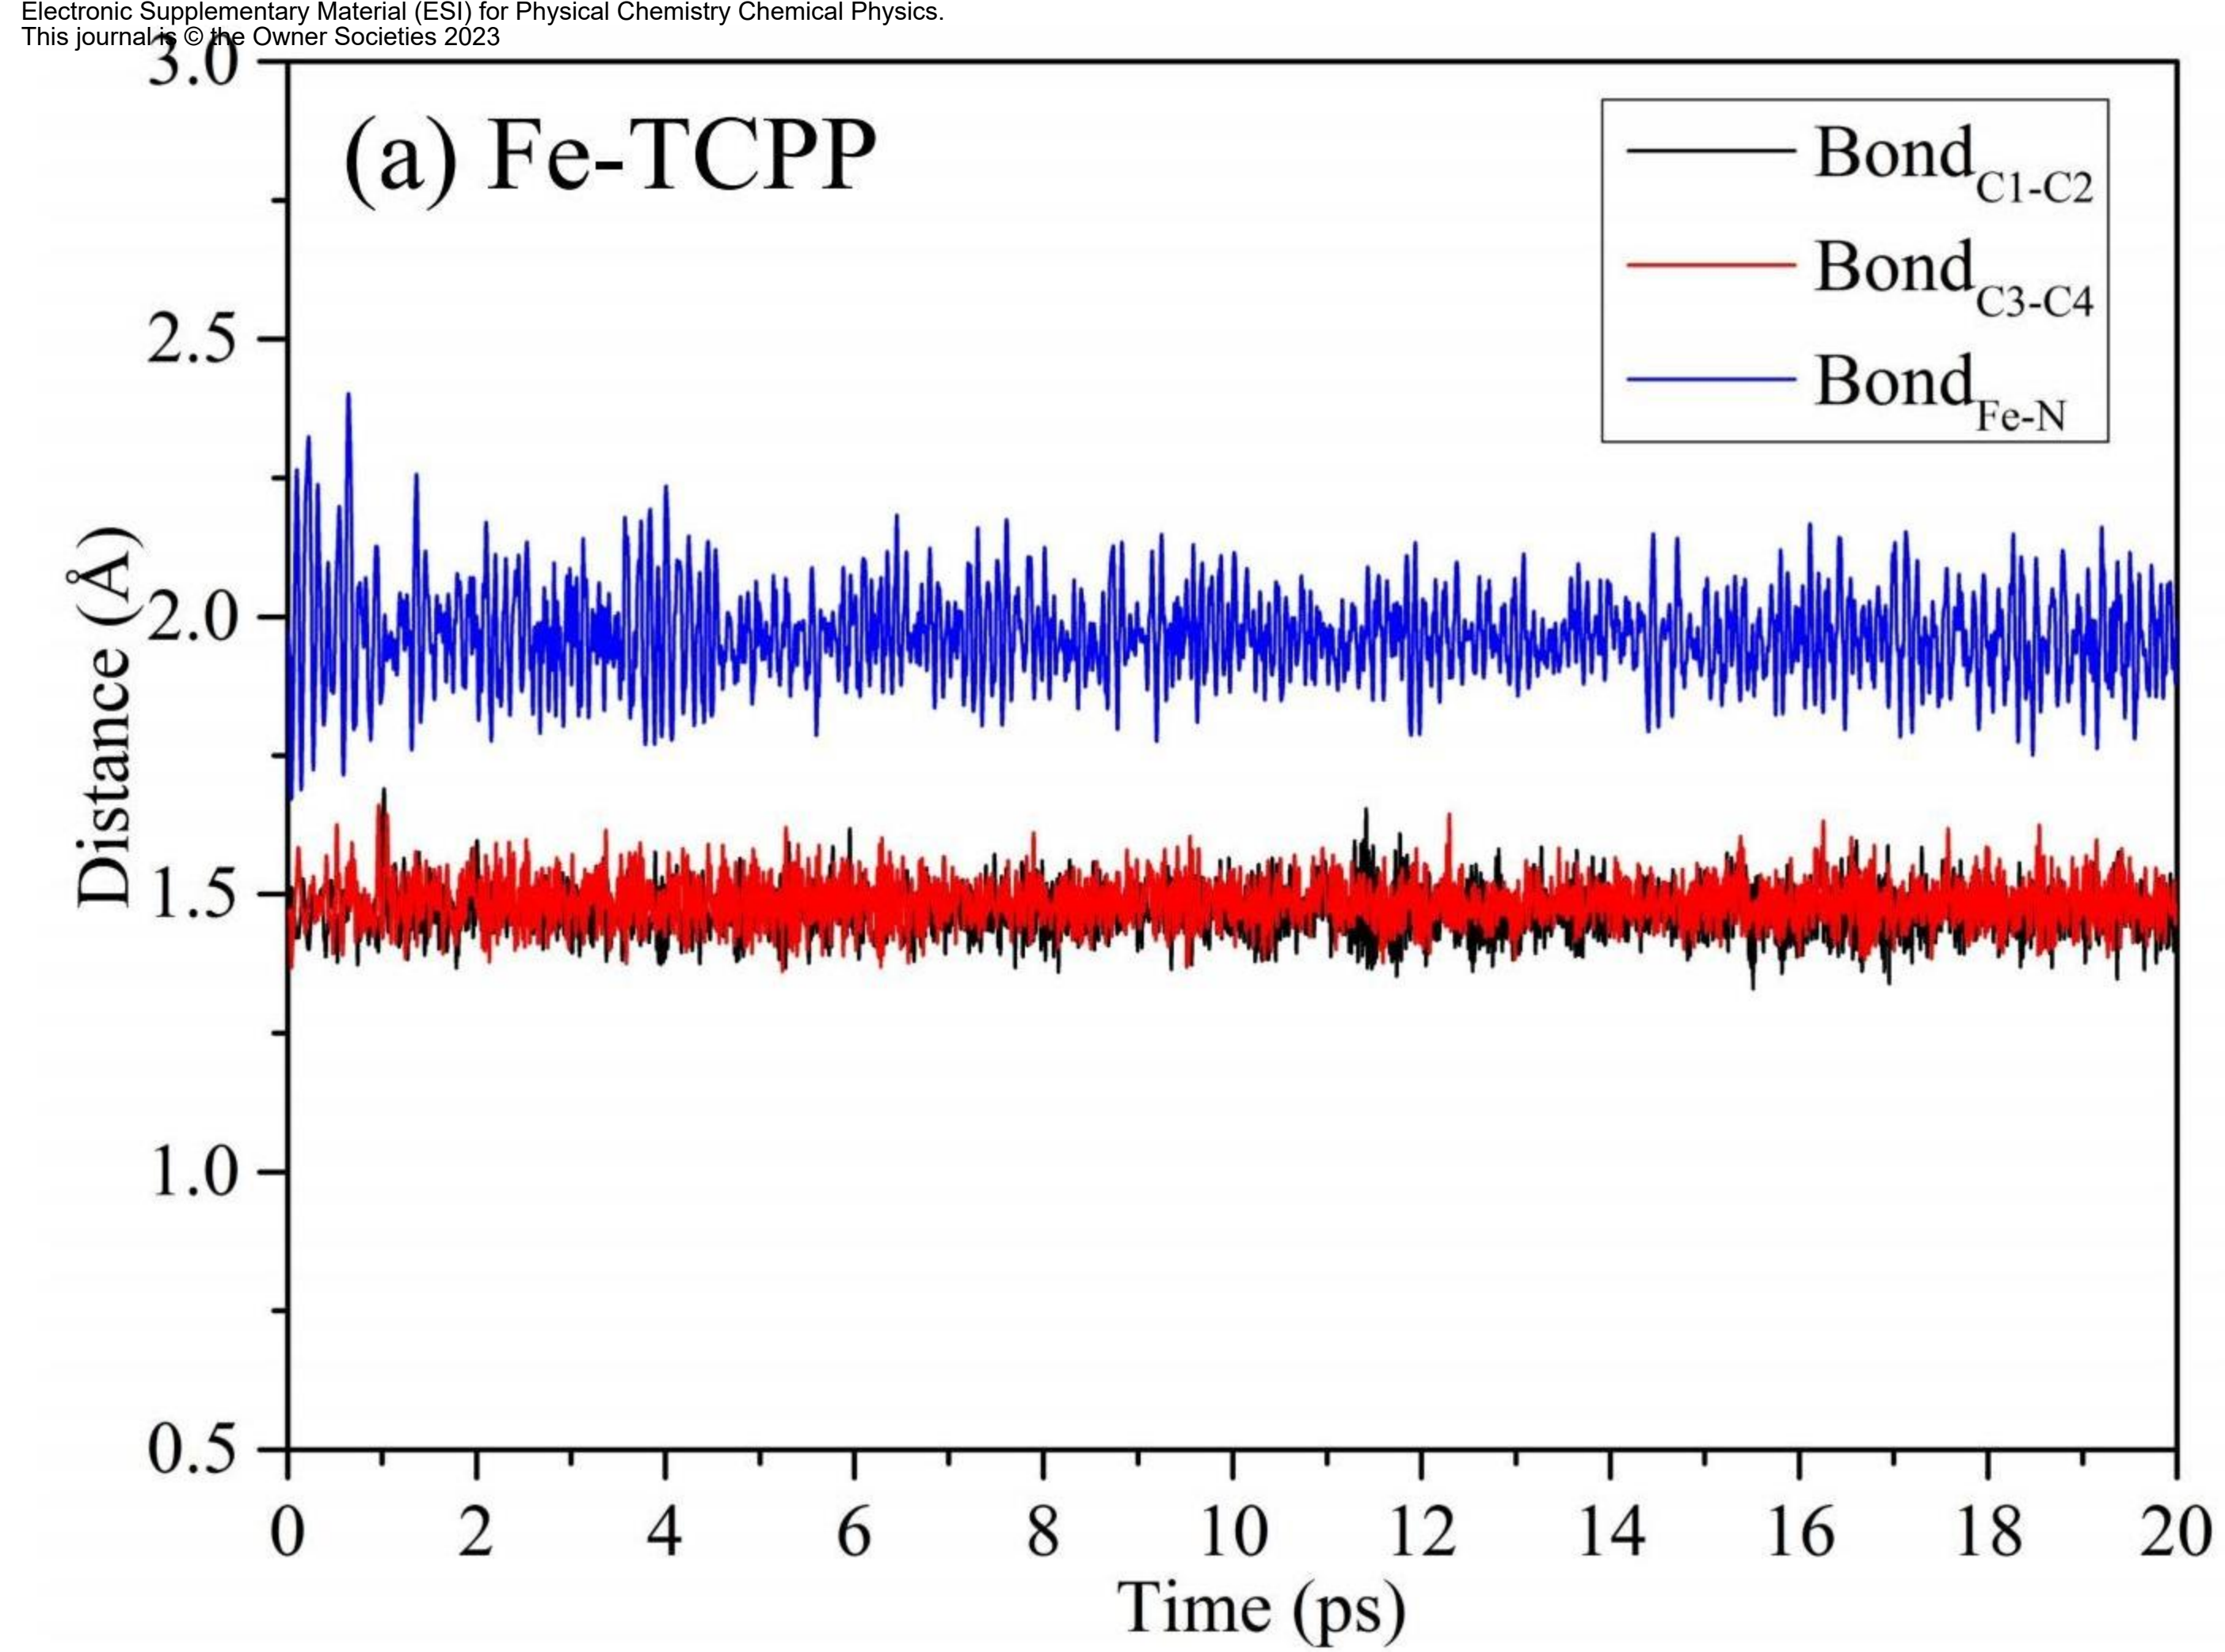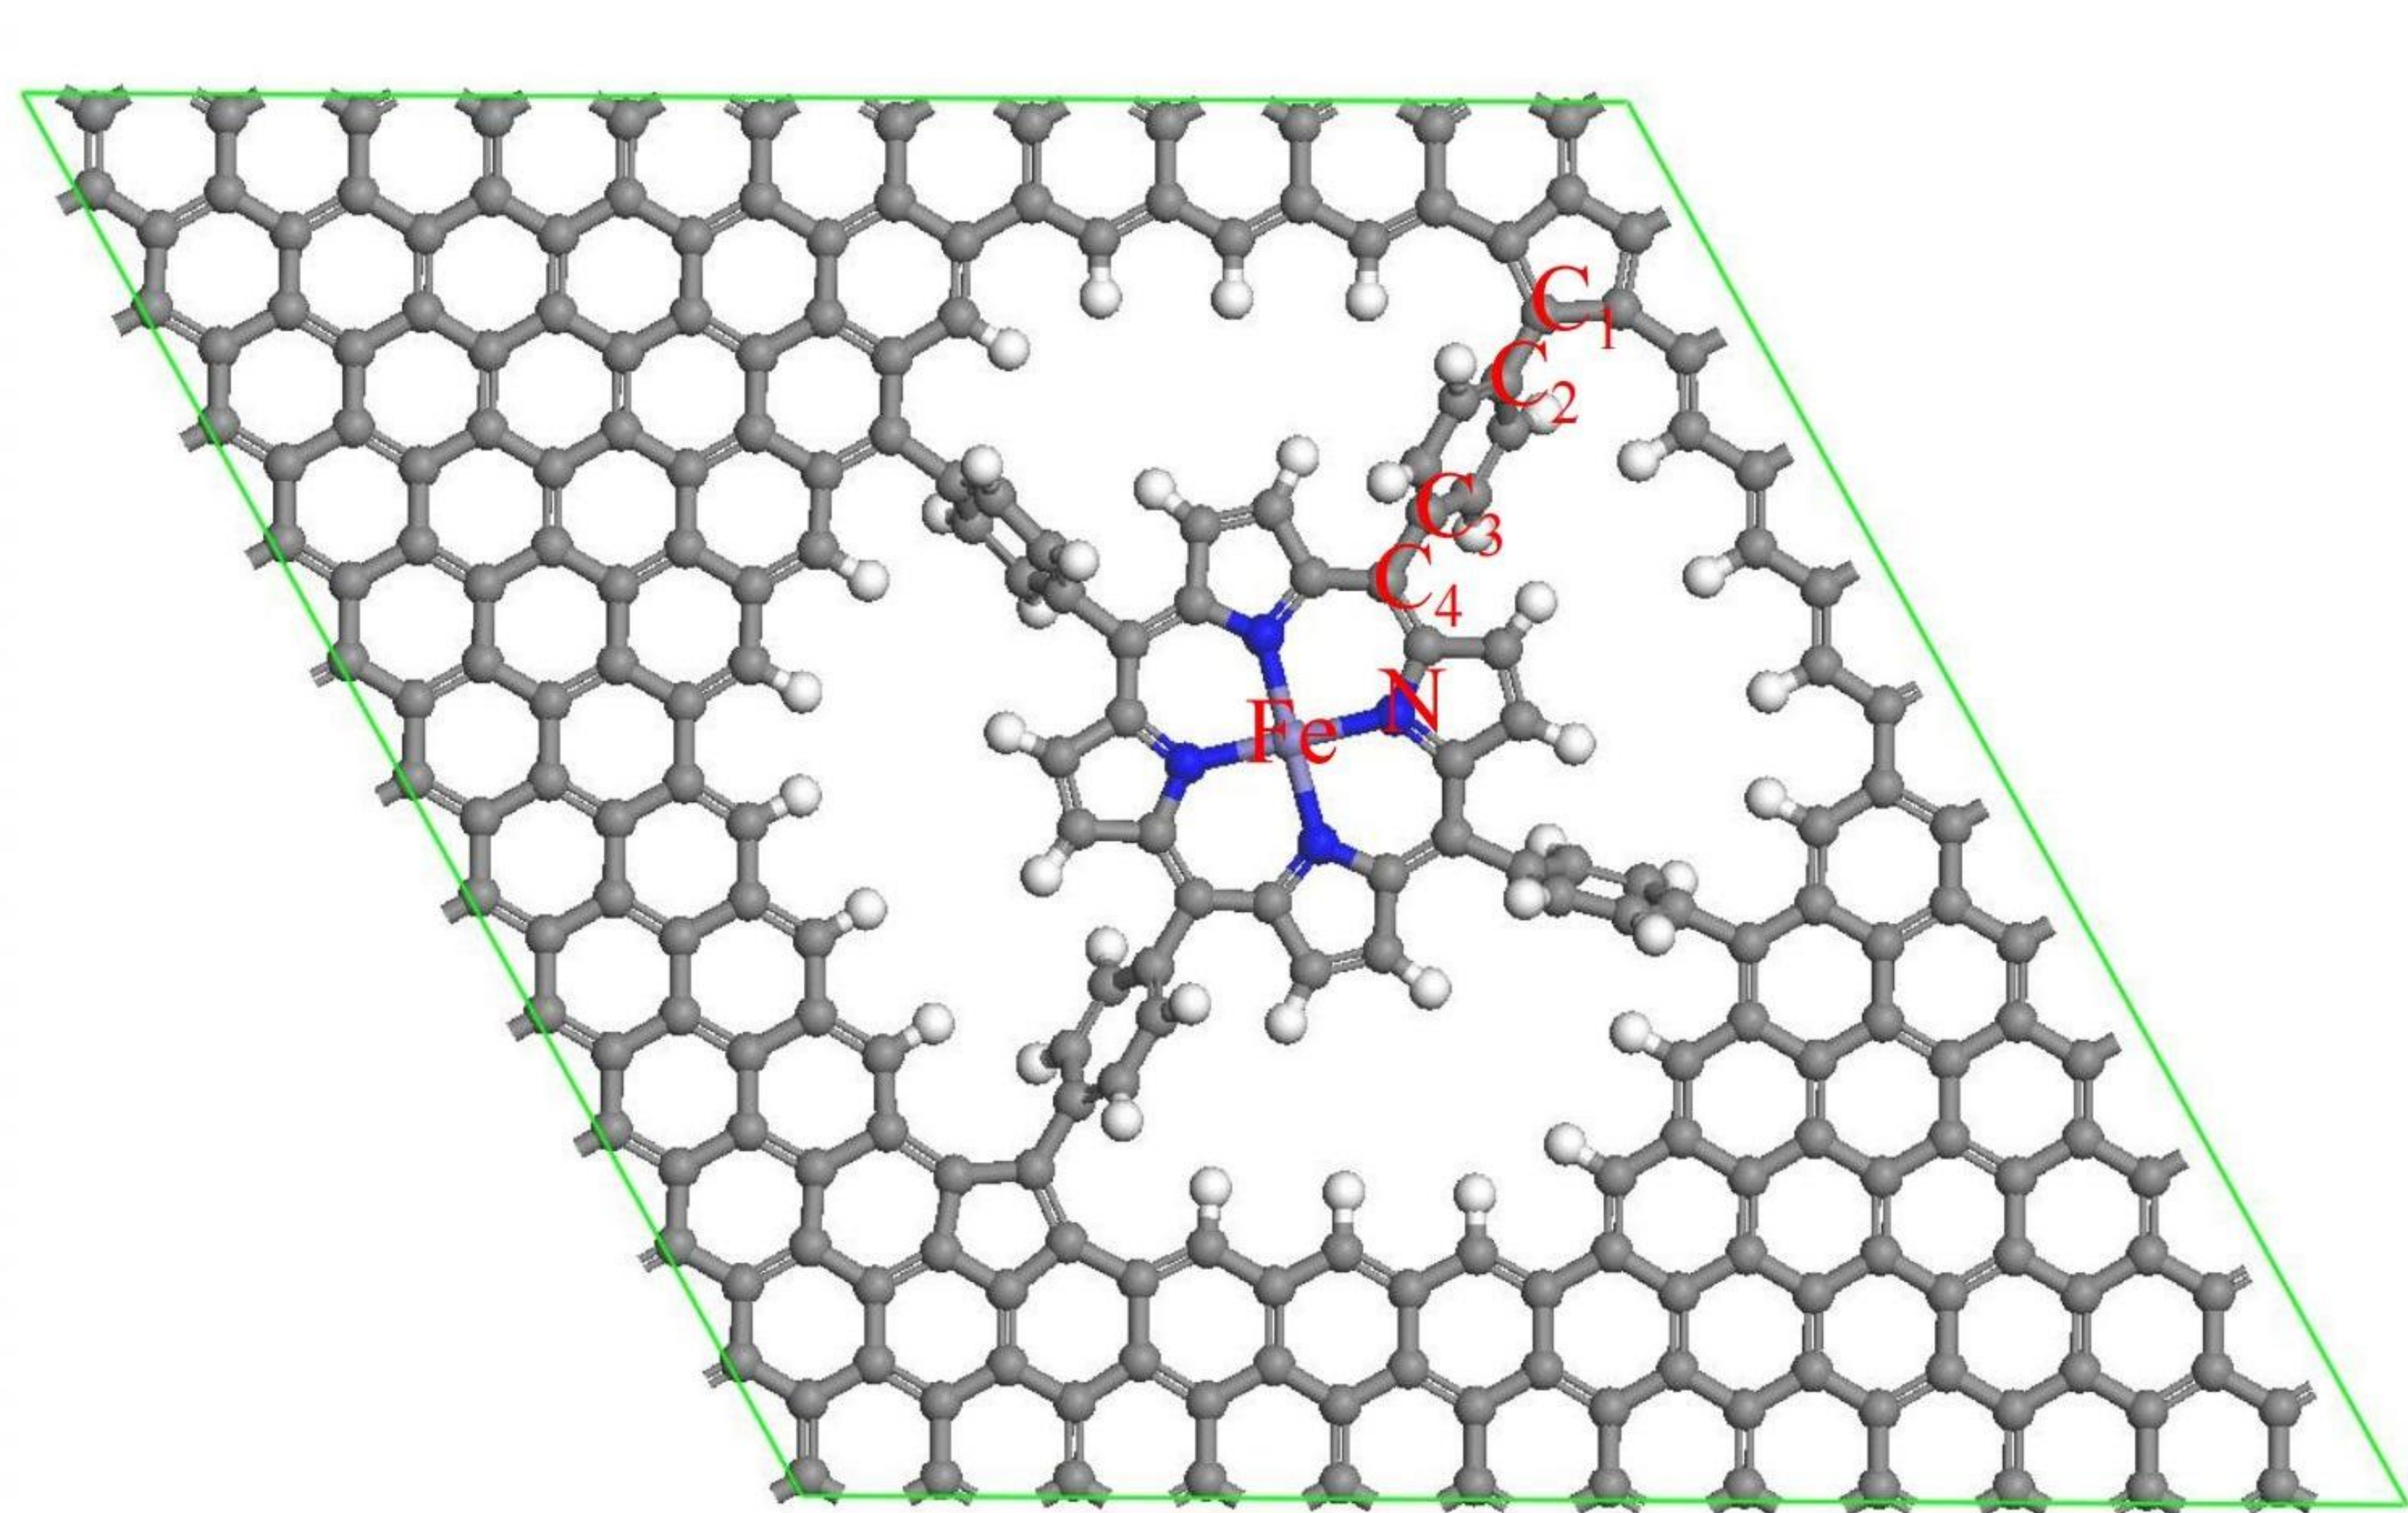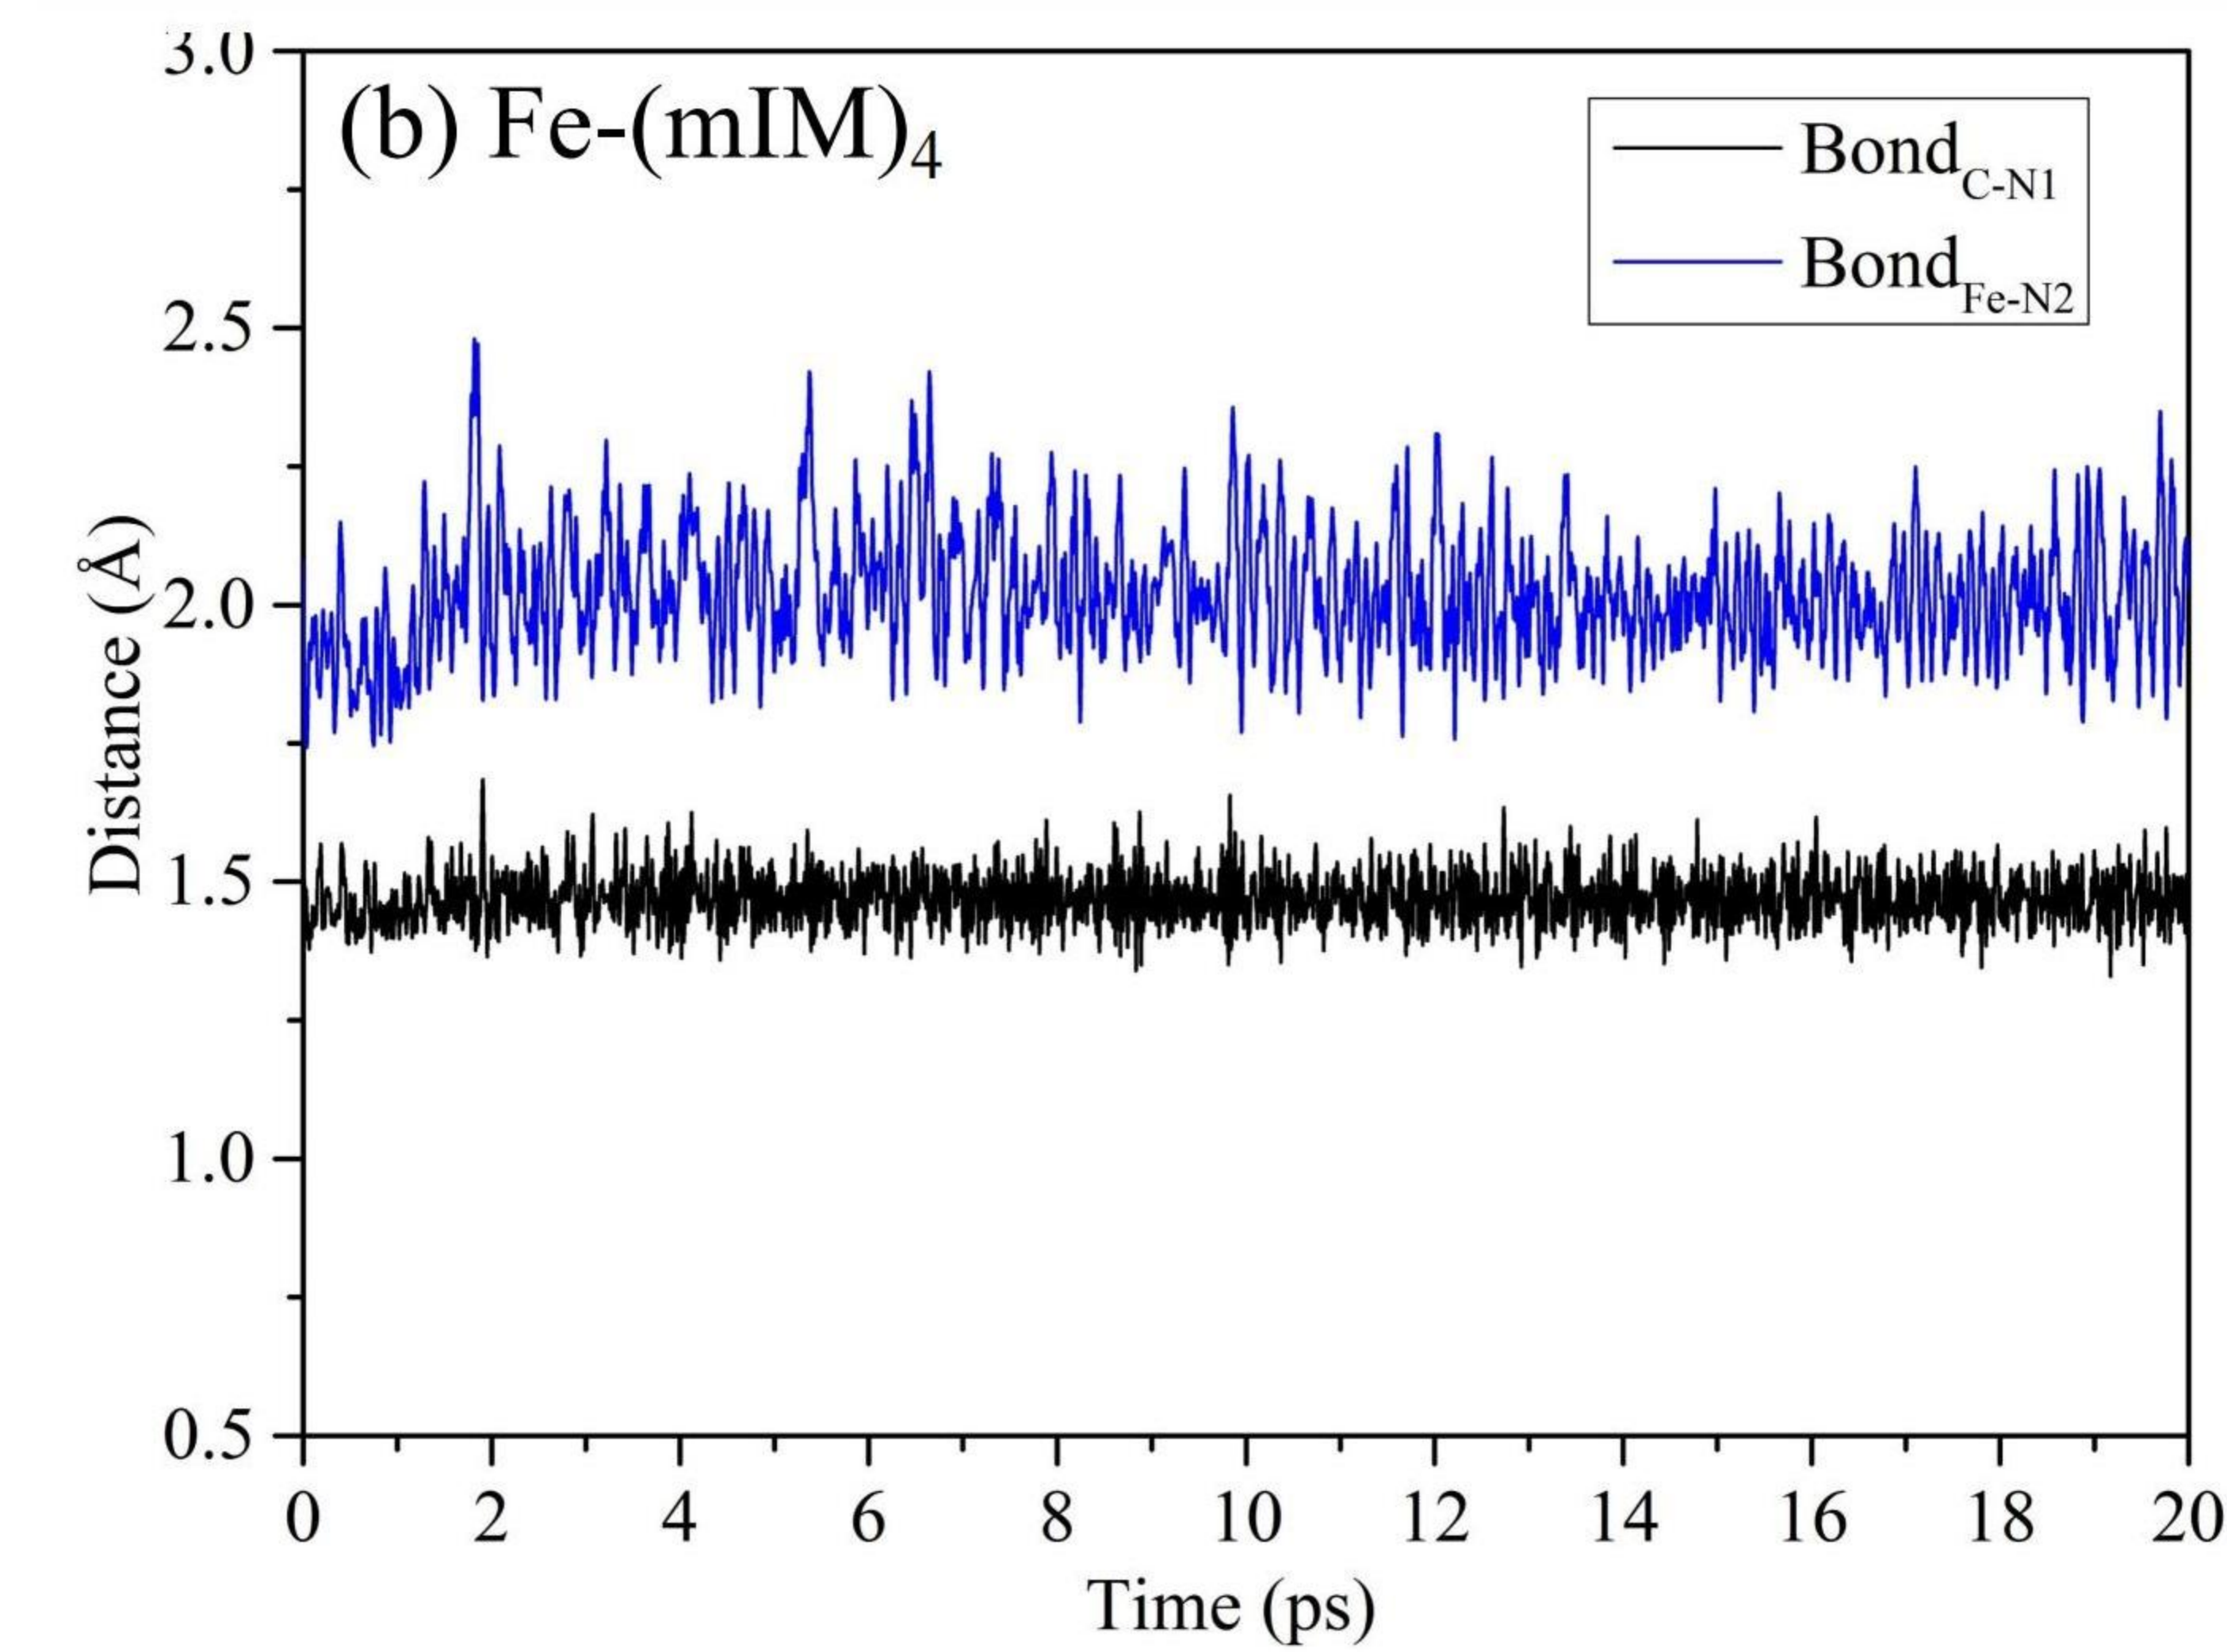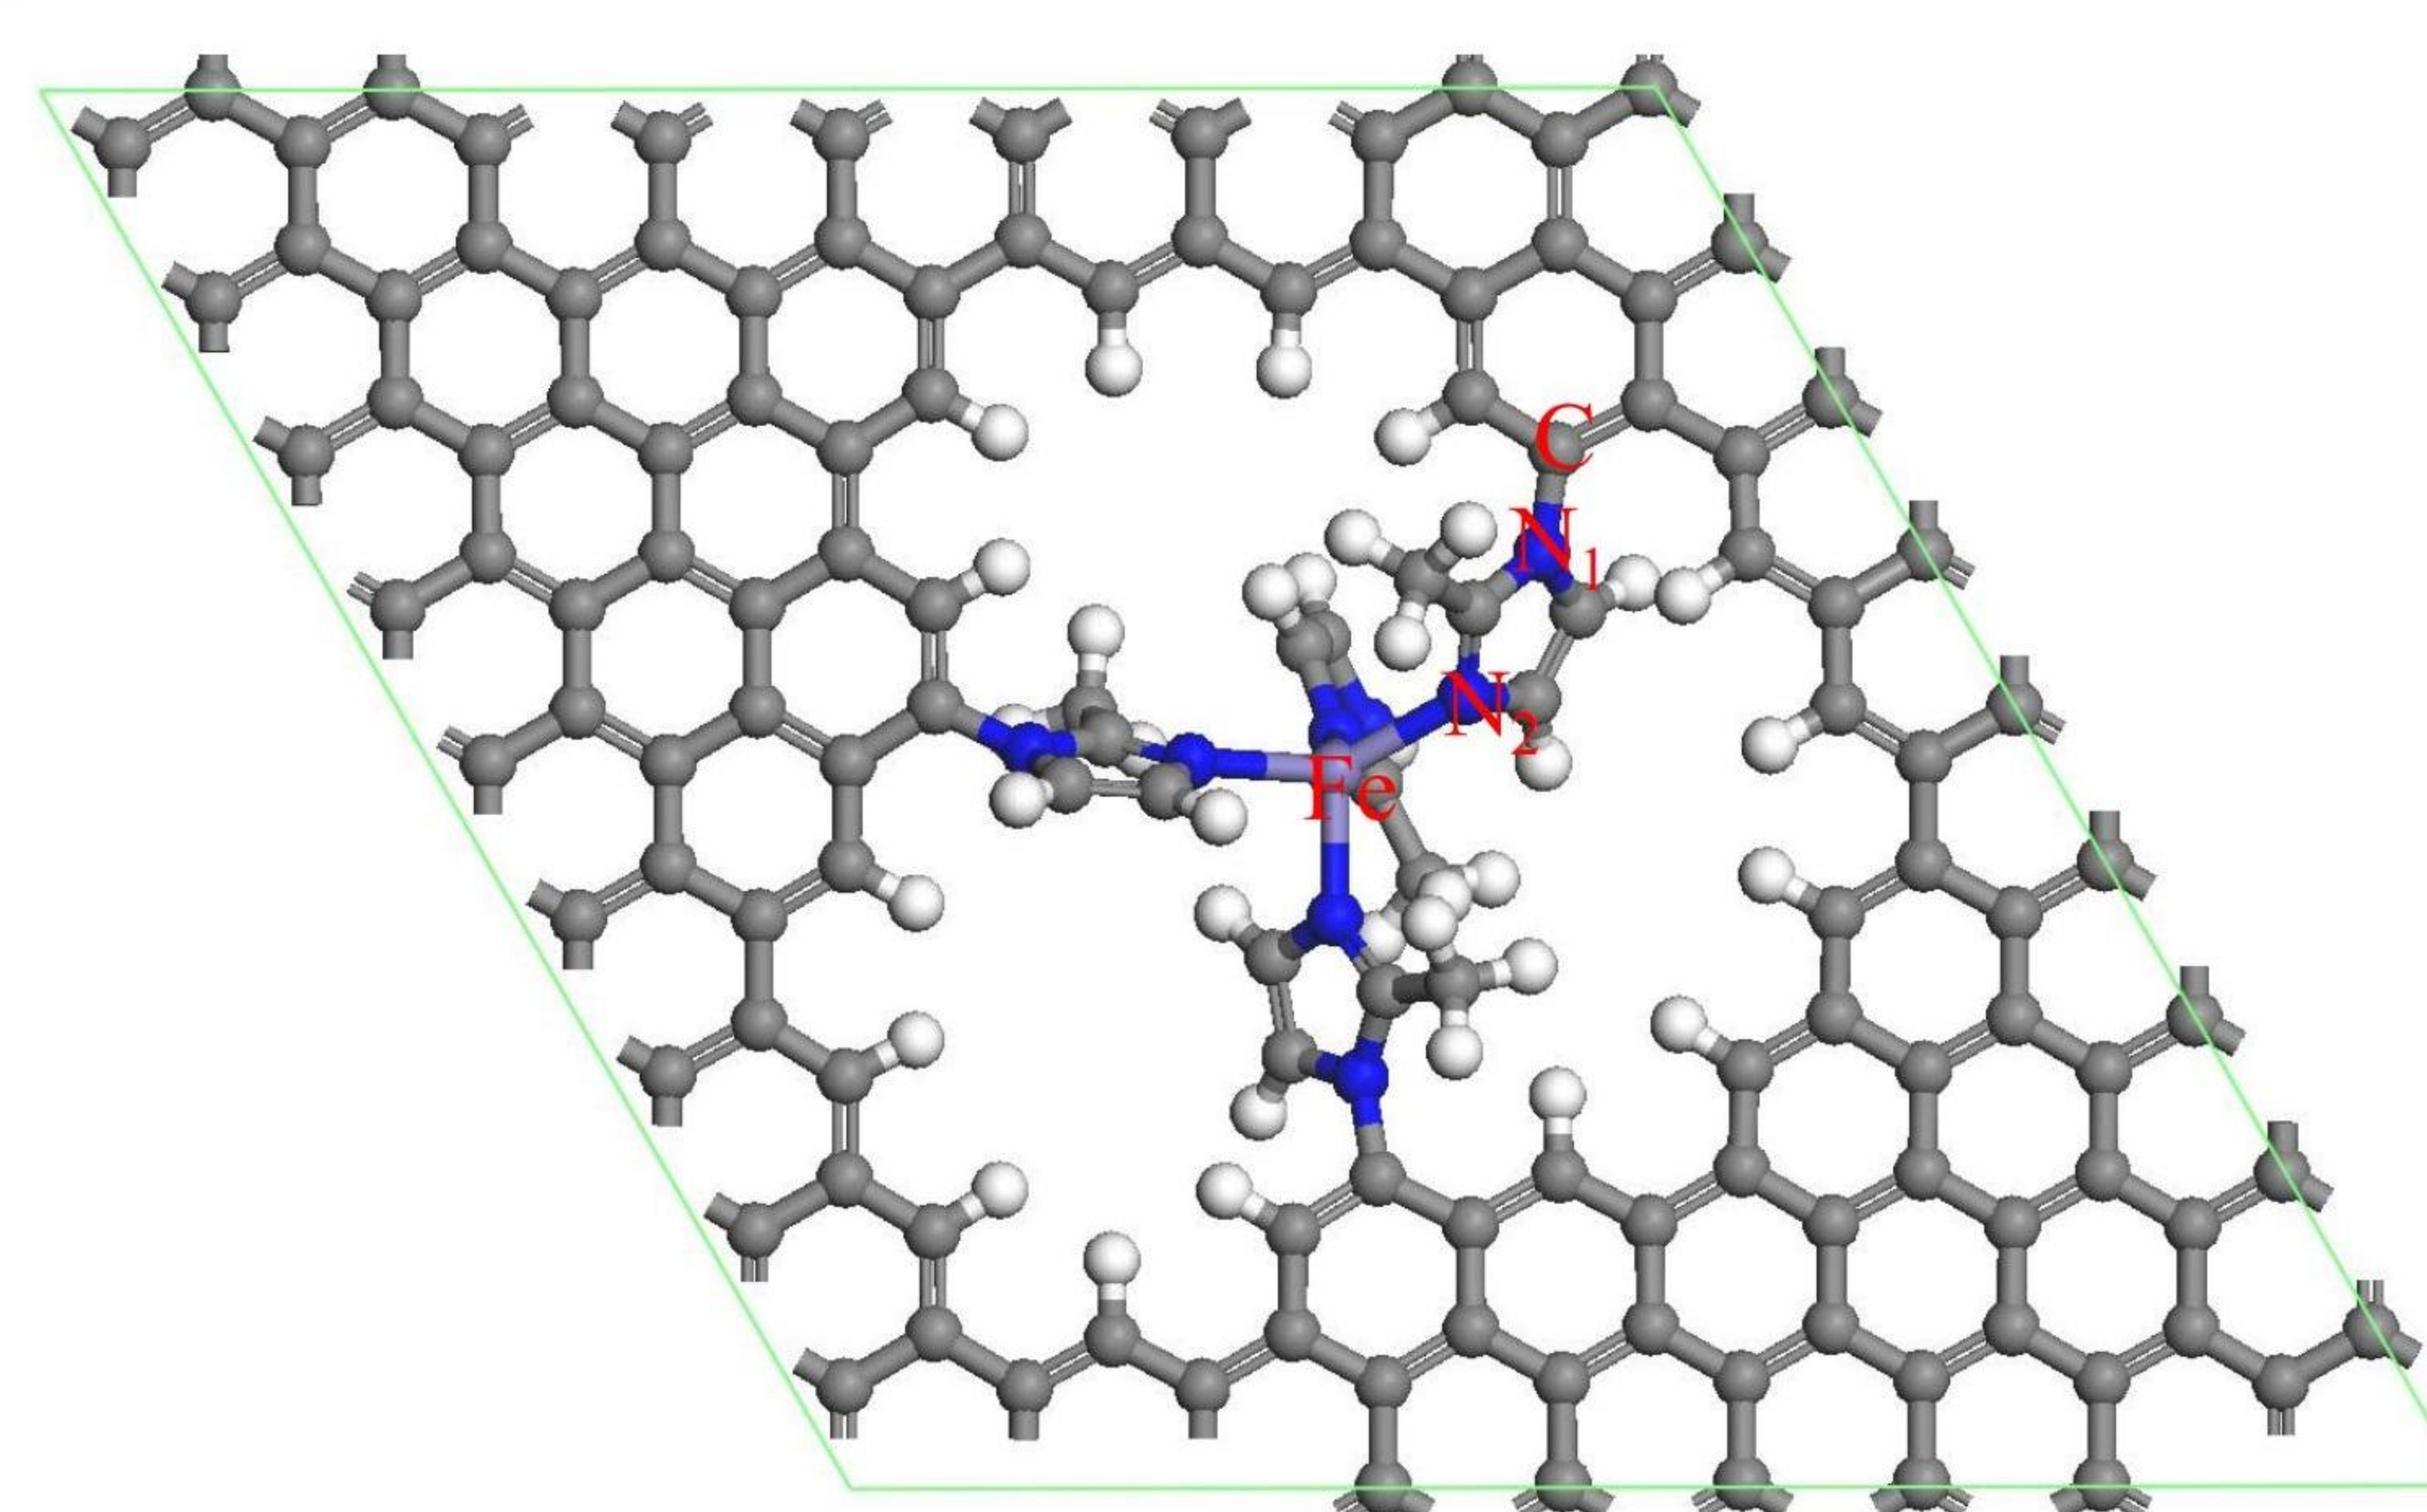

Supplement: d2cp06057d1.pdf [file d2cp06057d1.pdf]

(a) Fe-TCPP

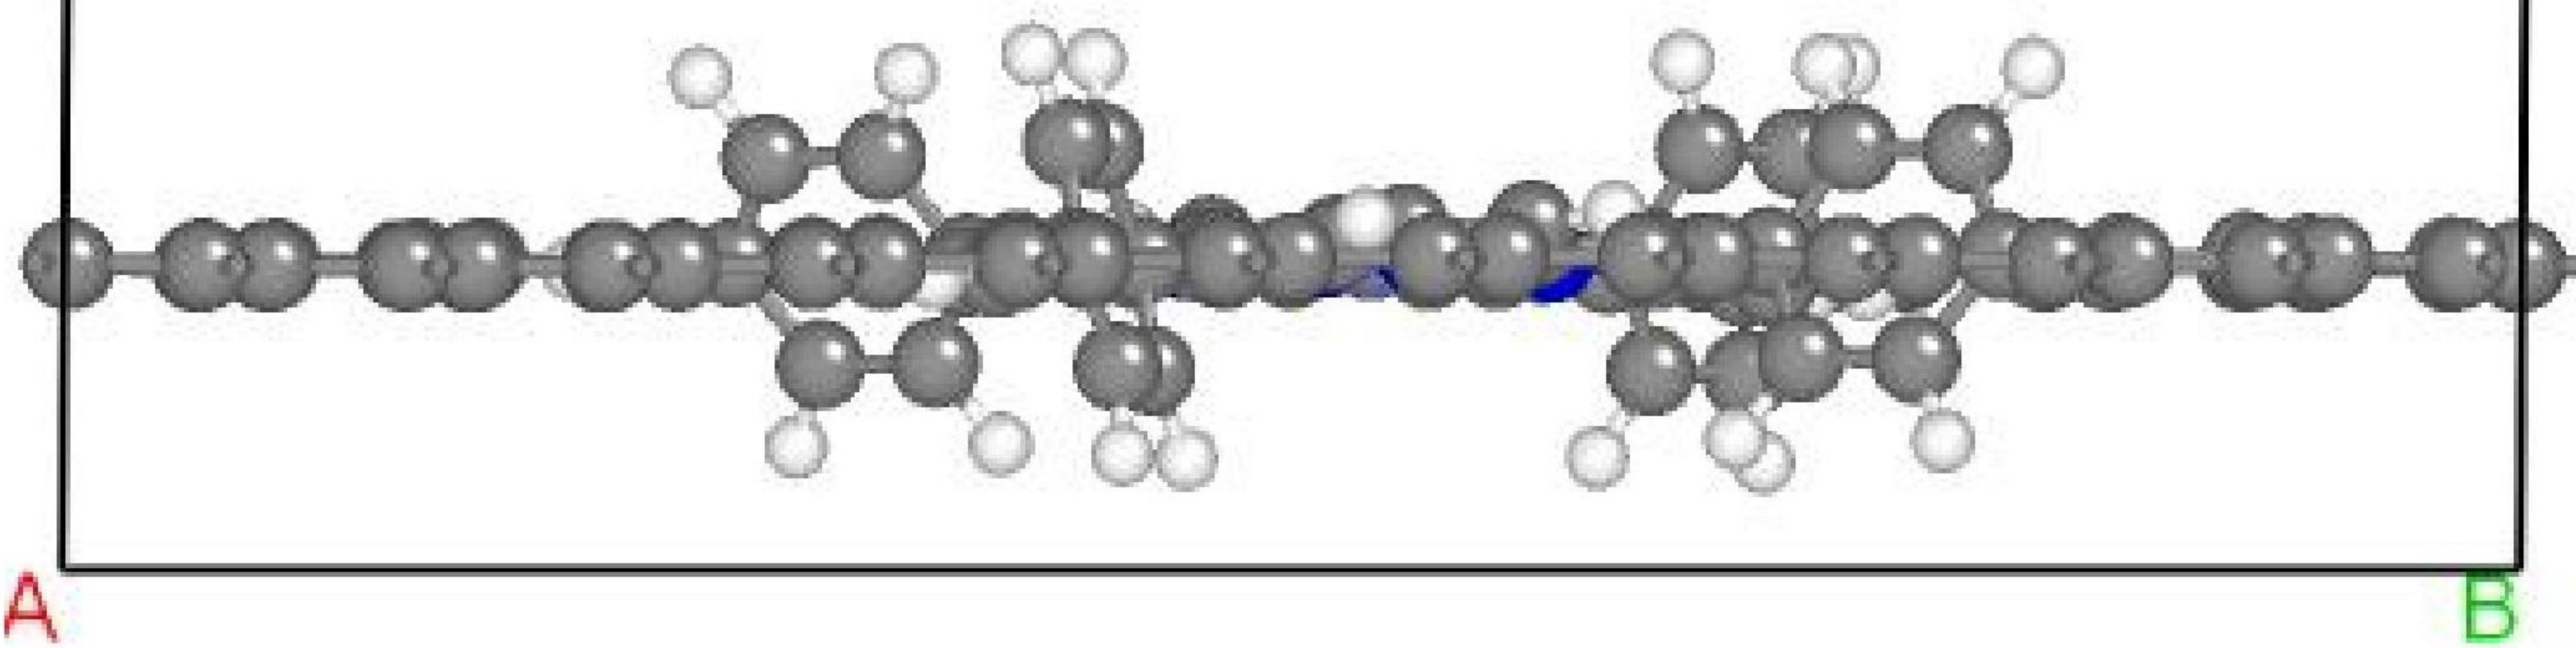

(b) Fe-(mIM)<sub>2</sub>

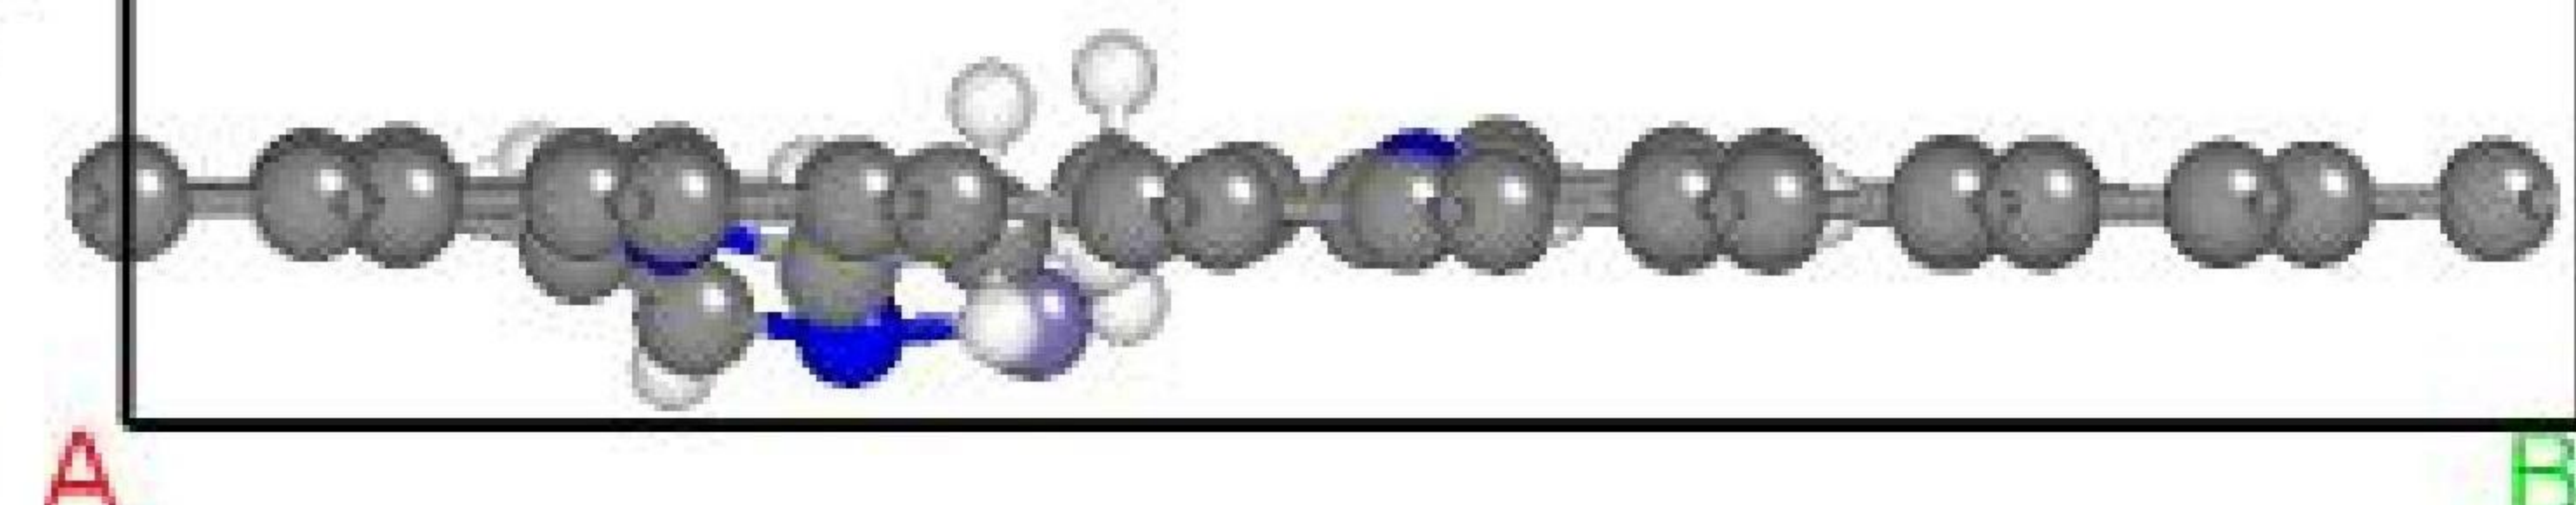

(c) Fe-(mIM)<sub>3</sub>

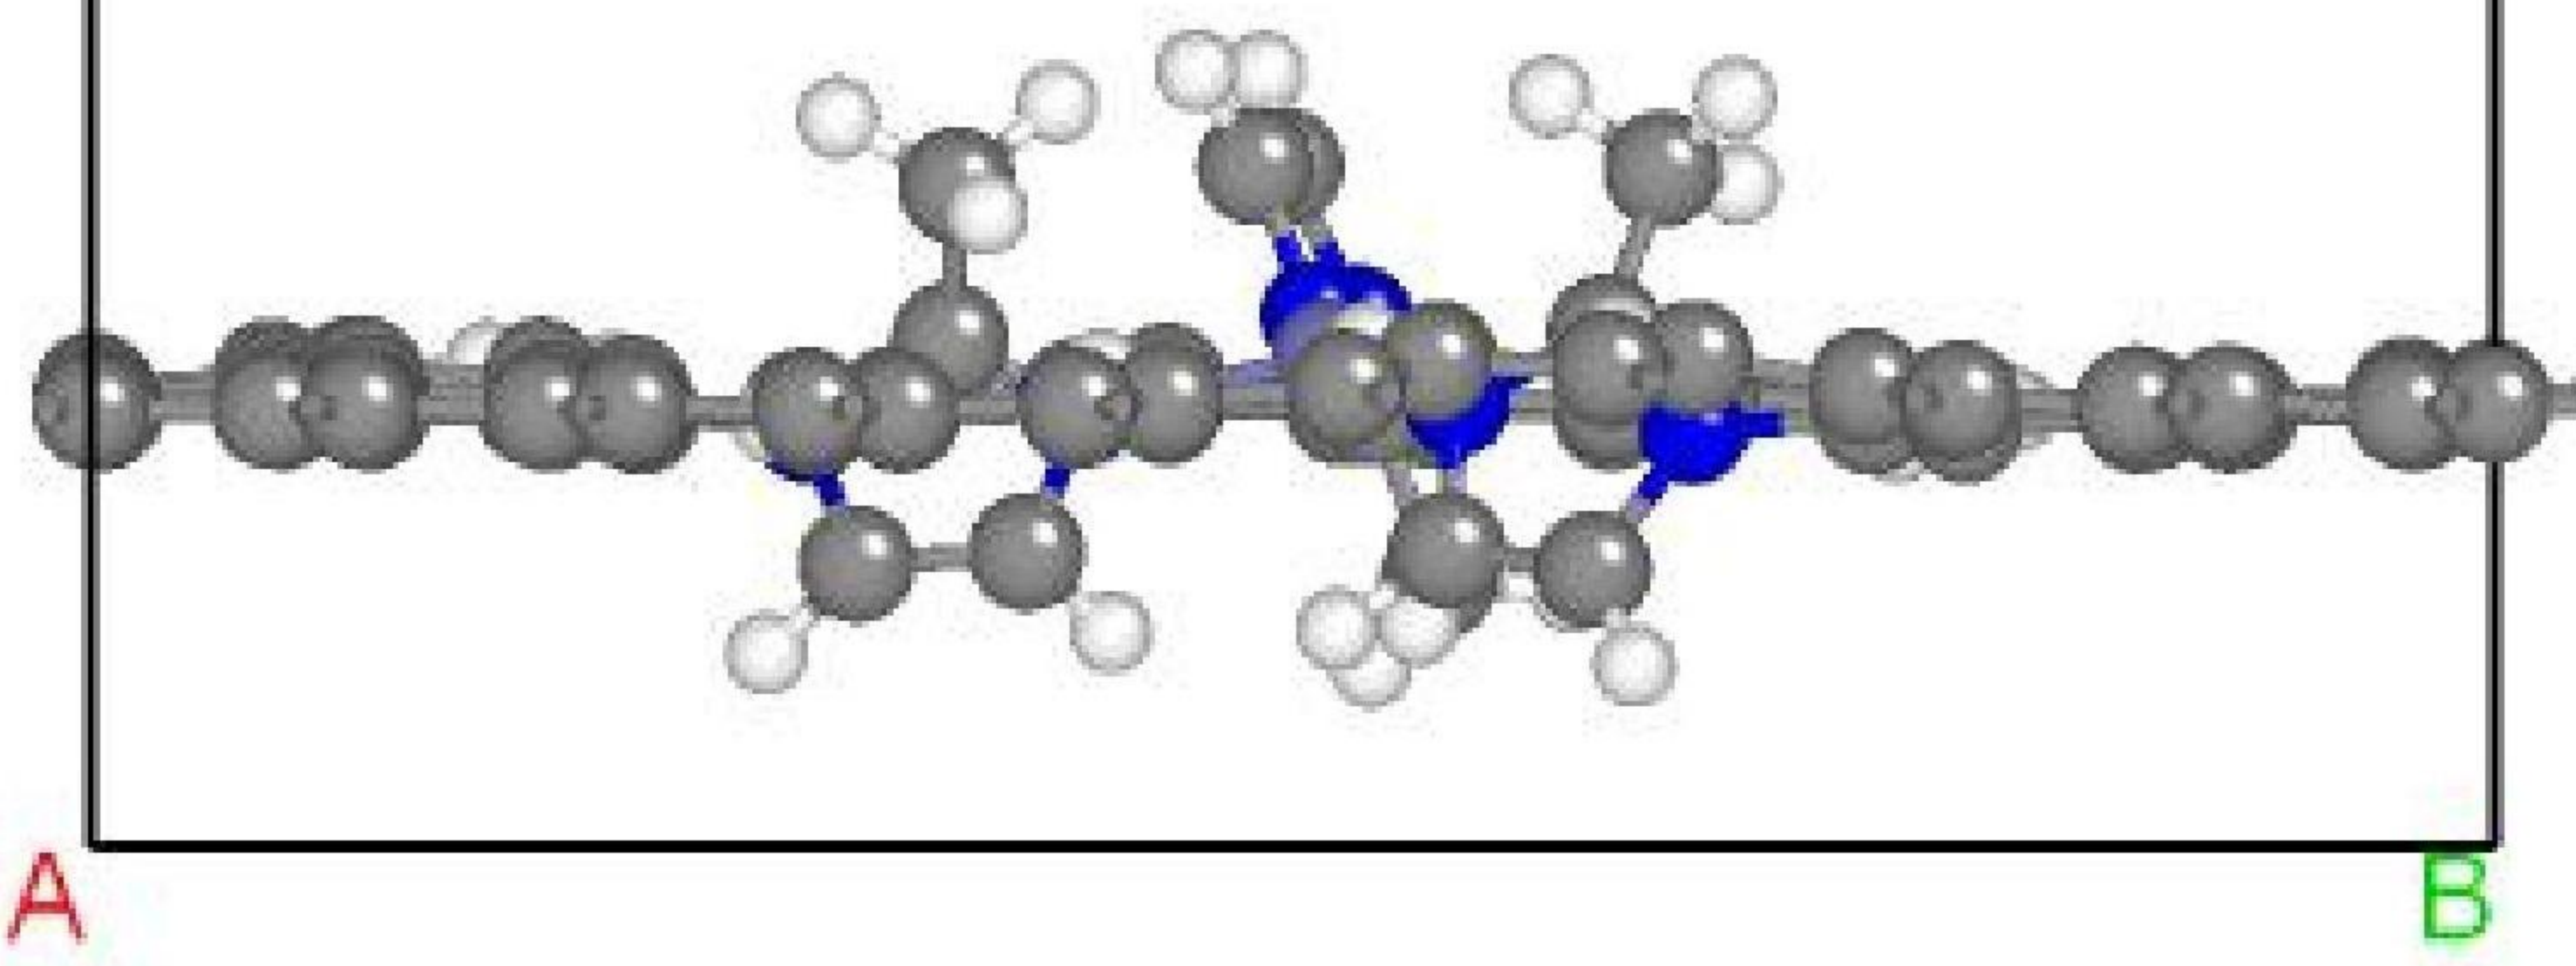

(d) Fe-(mIM)<sub>4</sub>

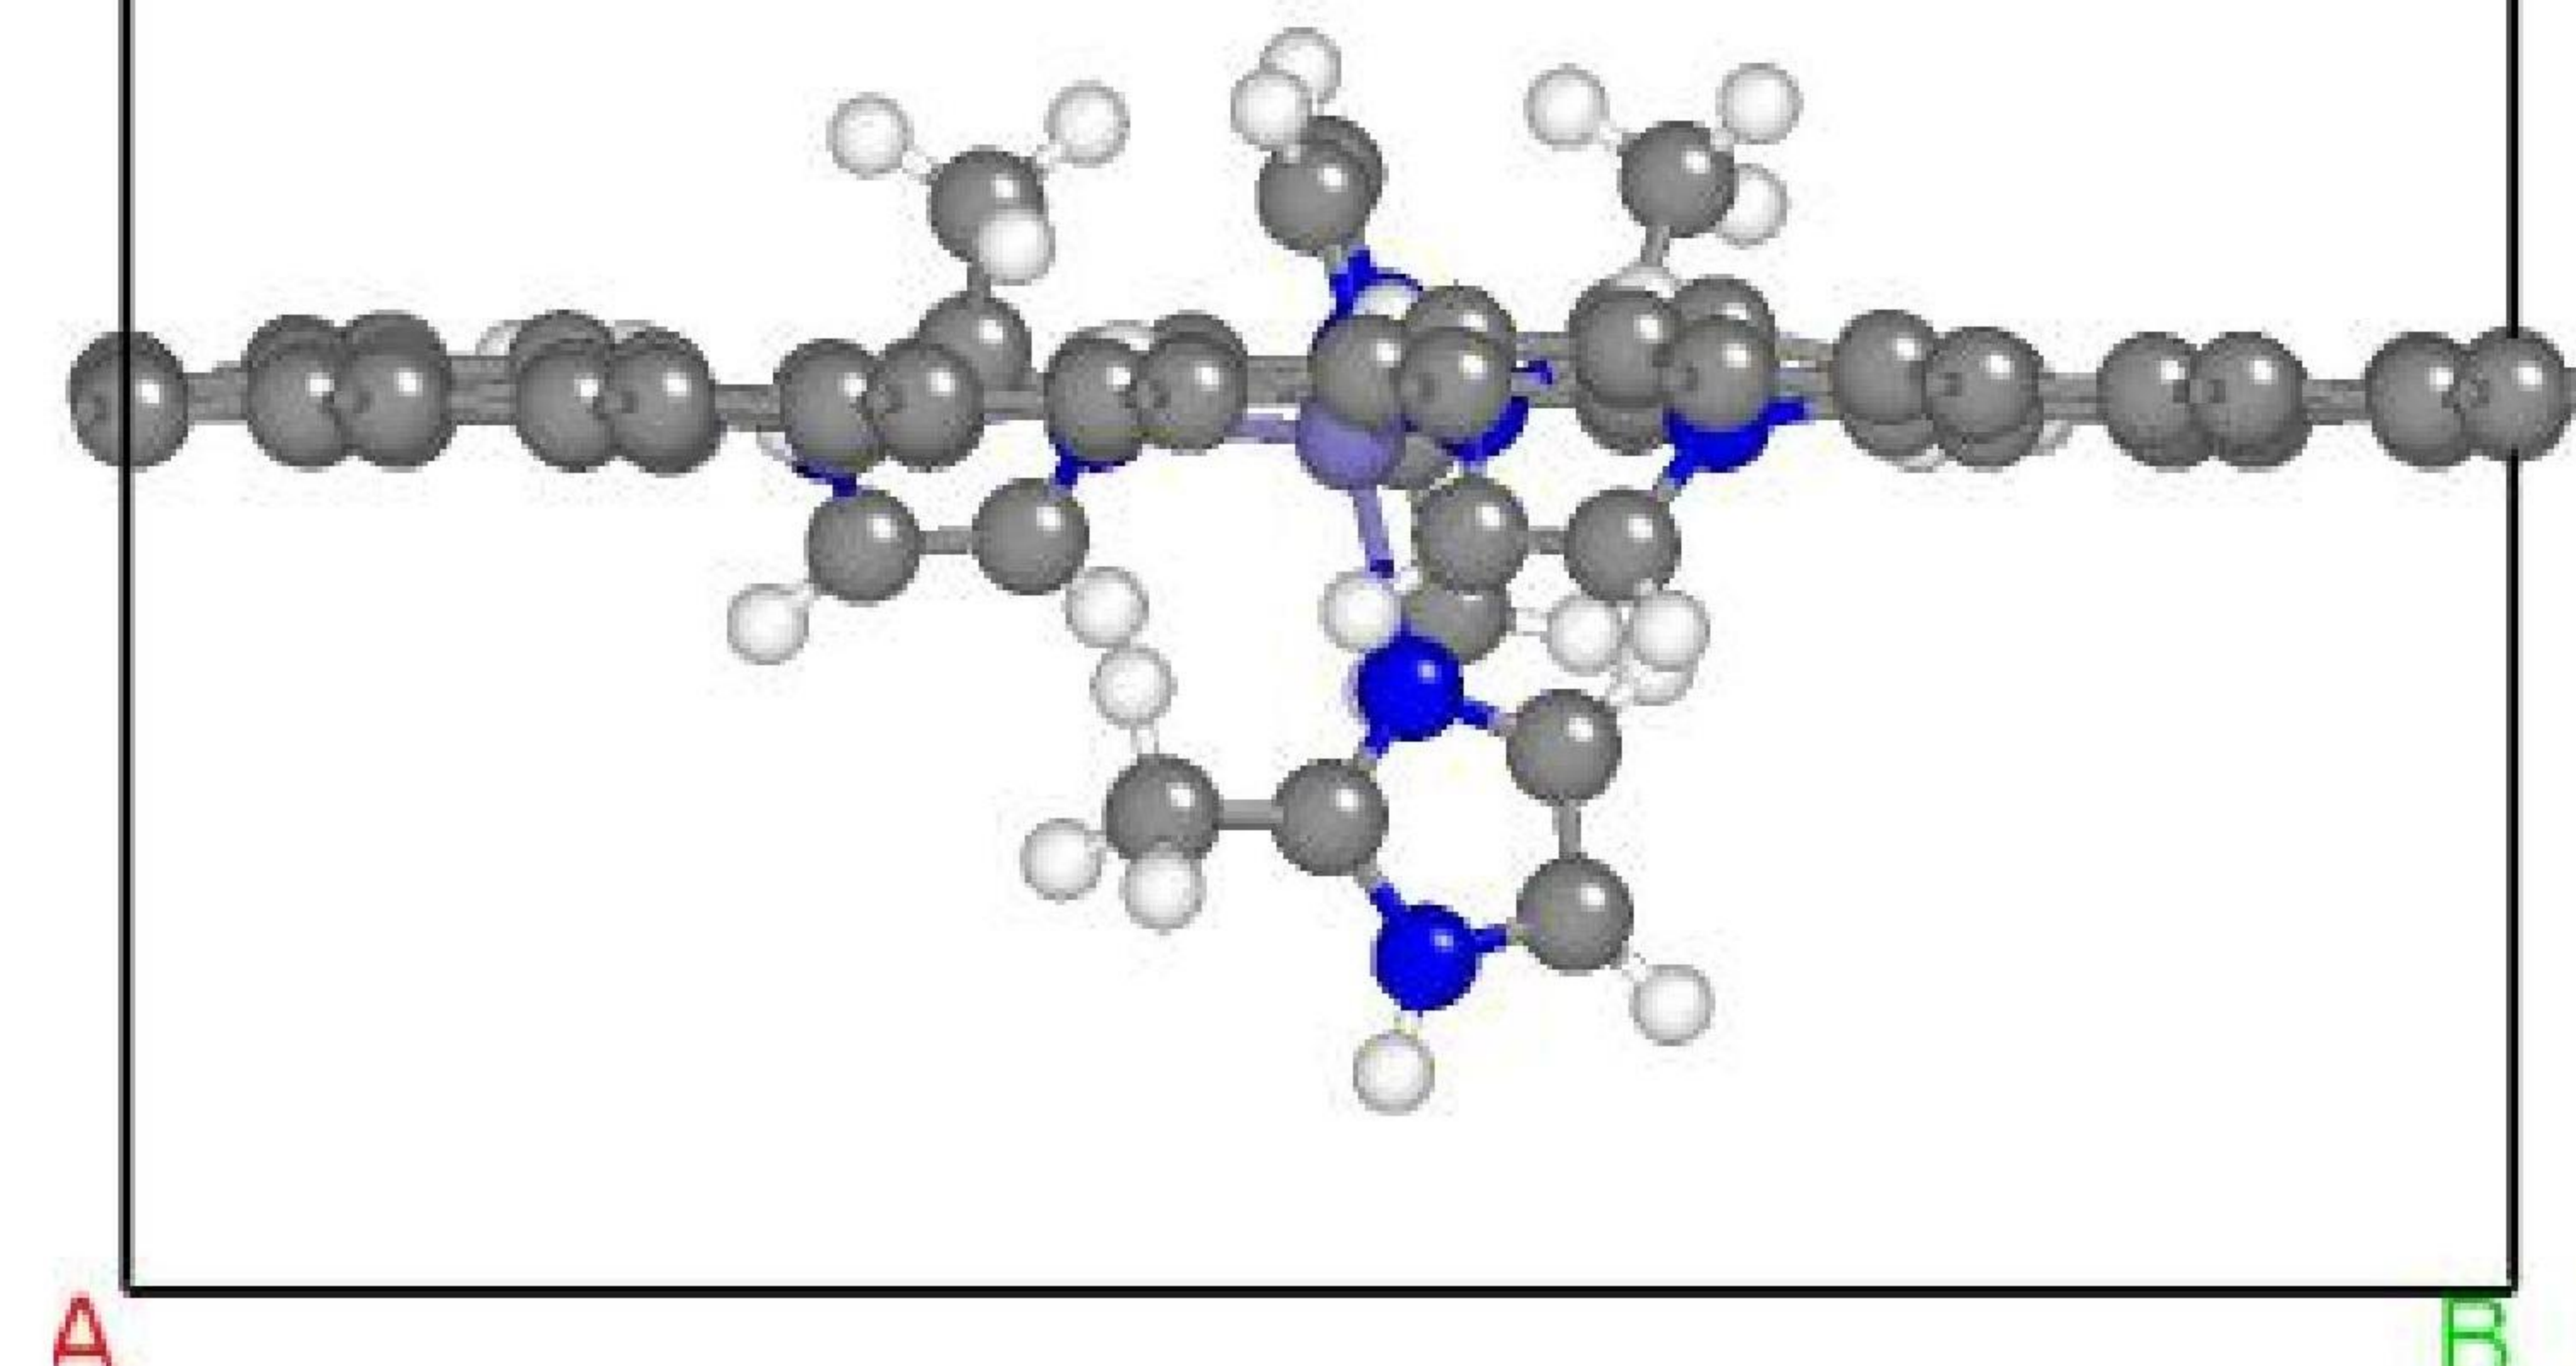

Supplement: d2cp06057d2.pdf [file d2cp06057d2.pdf]

(a) Fe-TCPP

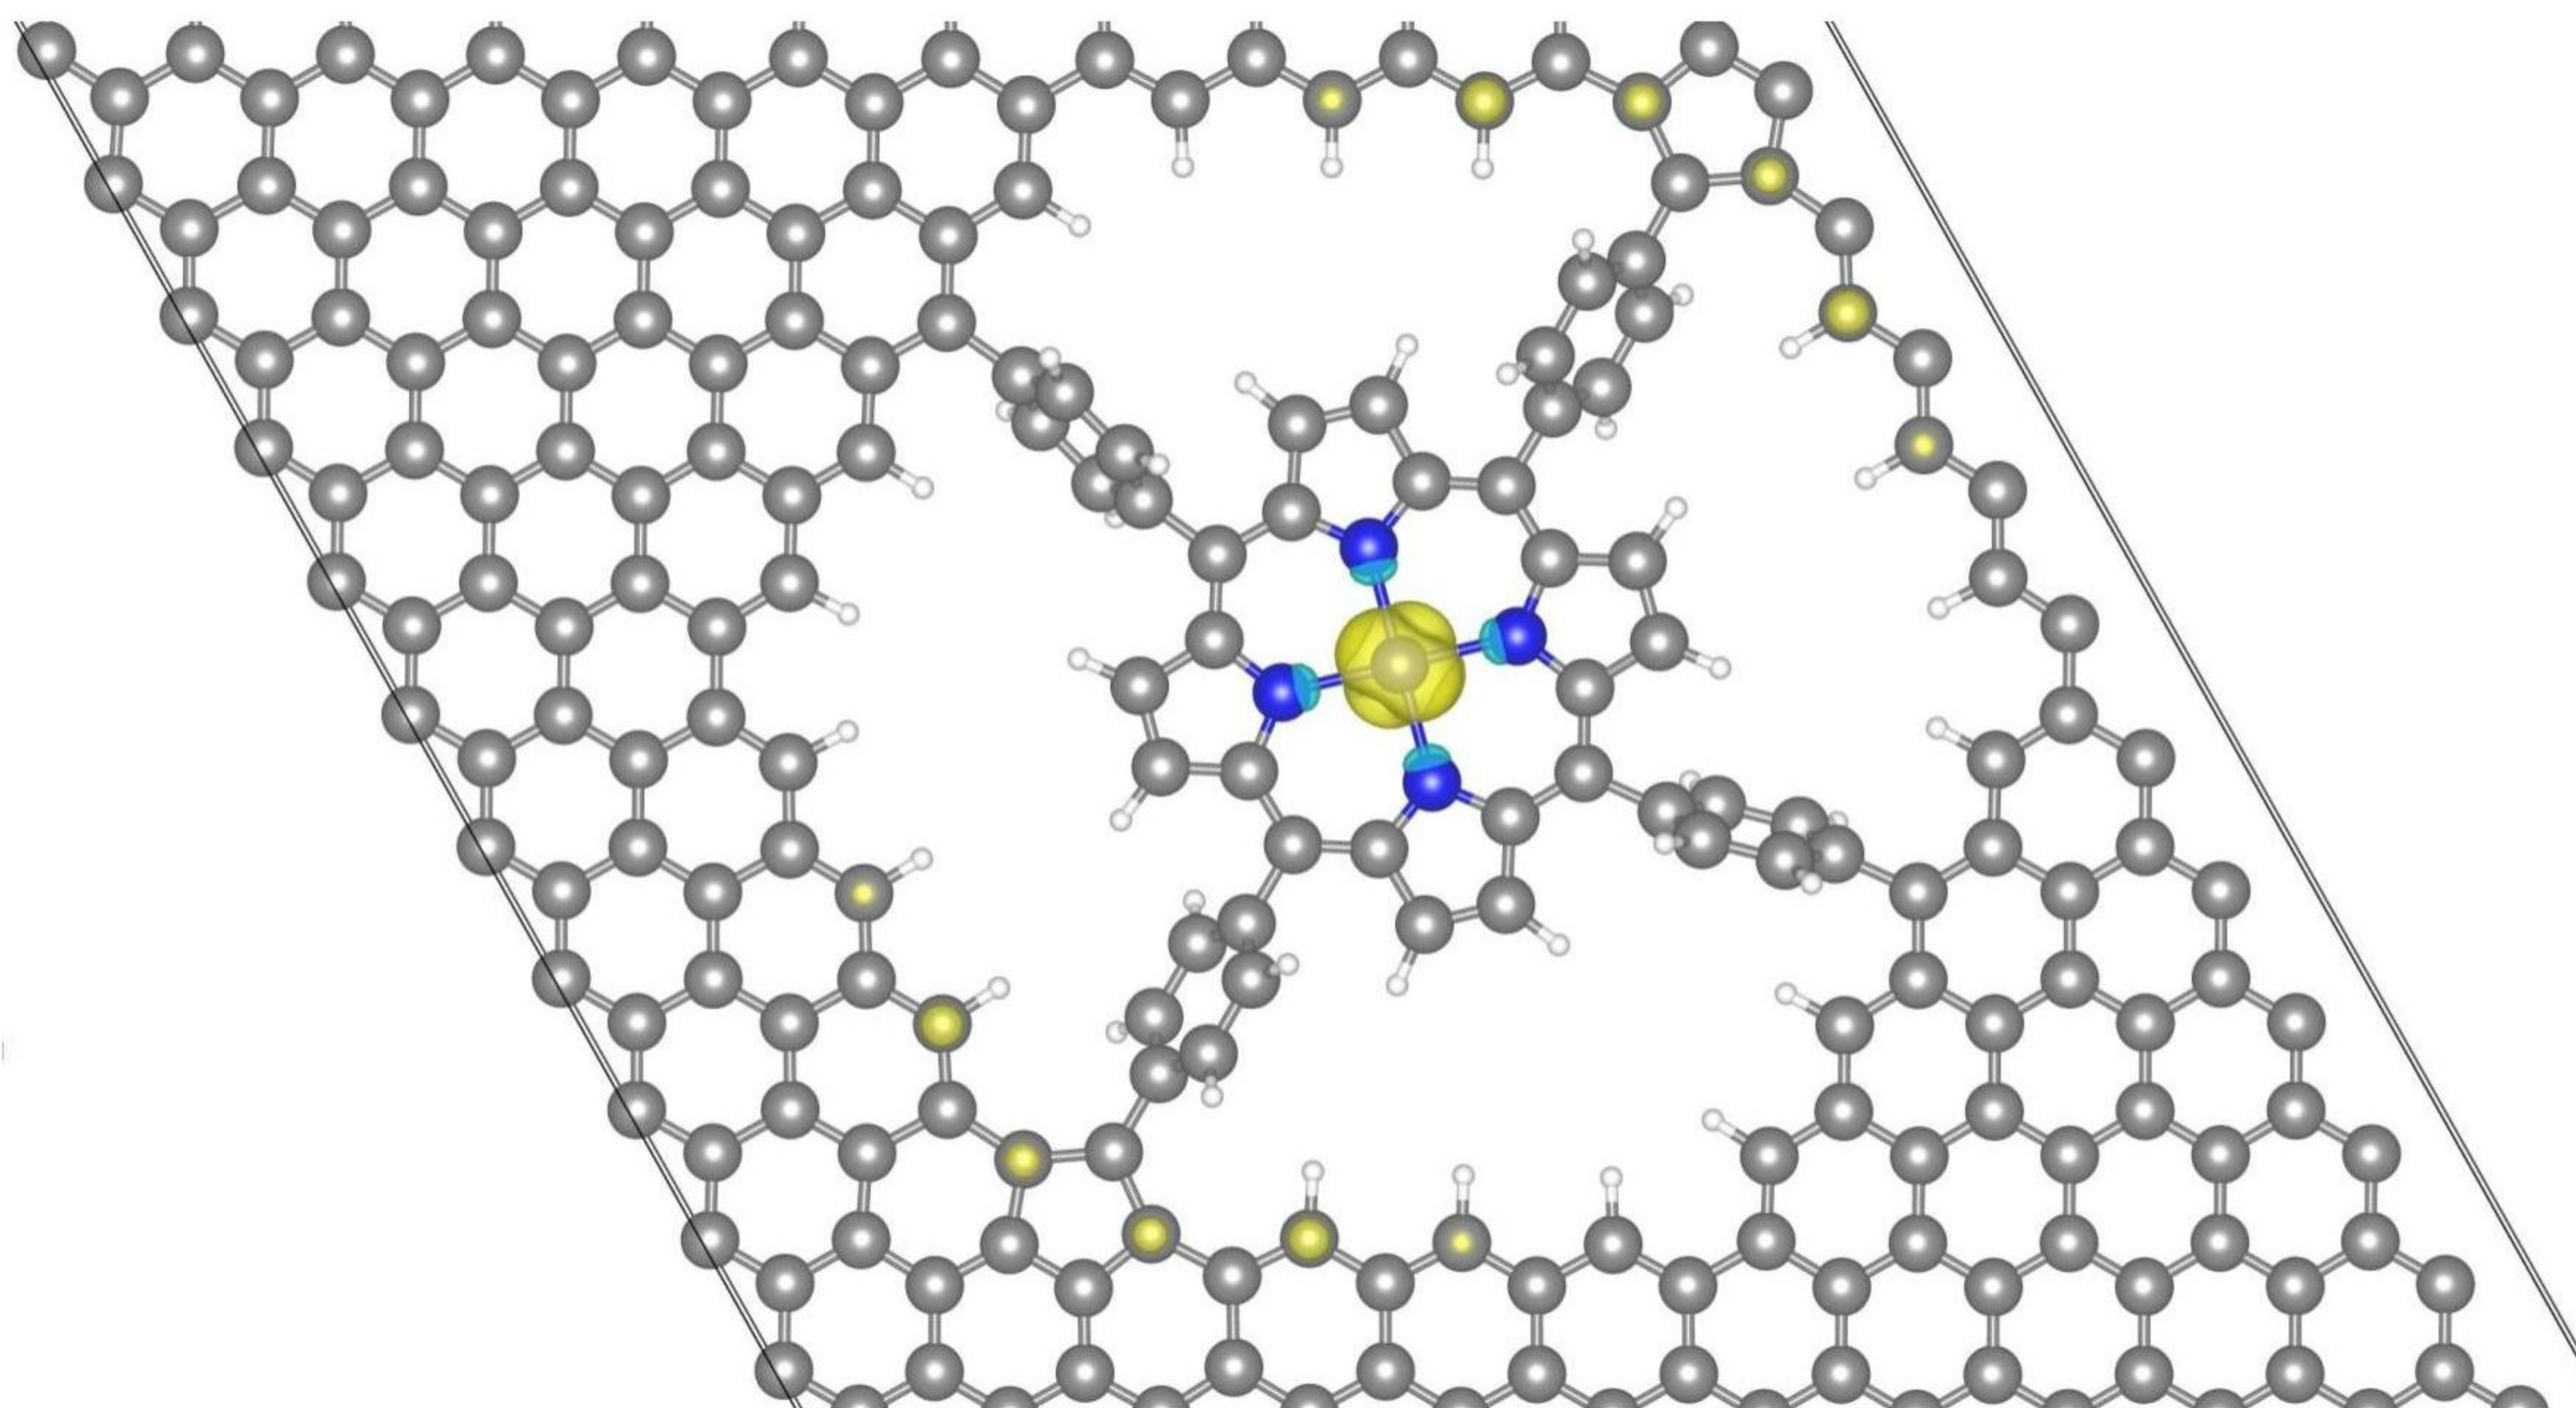

(b) Fe-(mIM)<sub>2</sub>

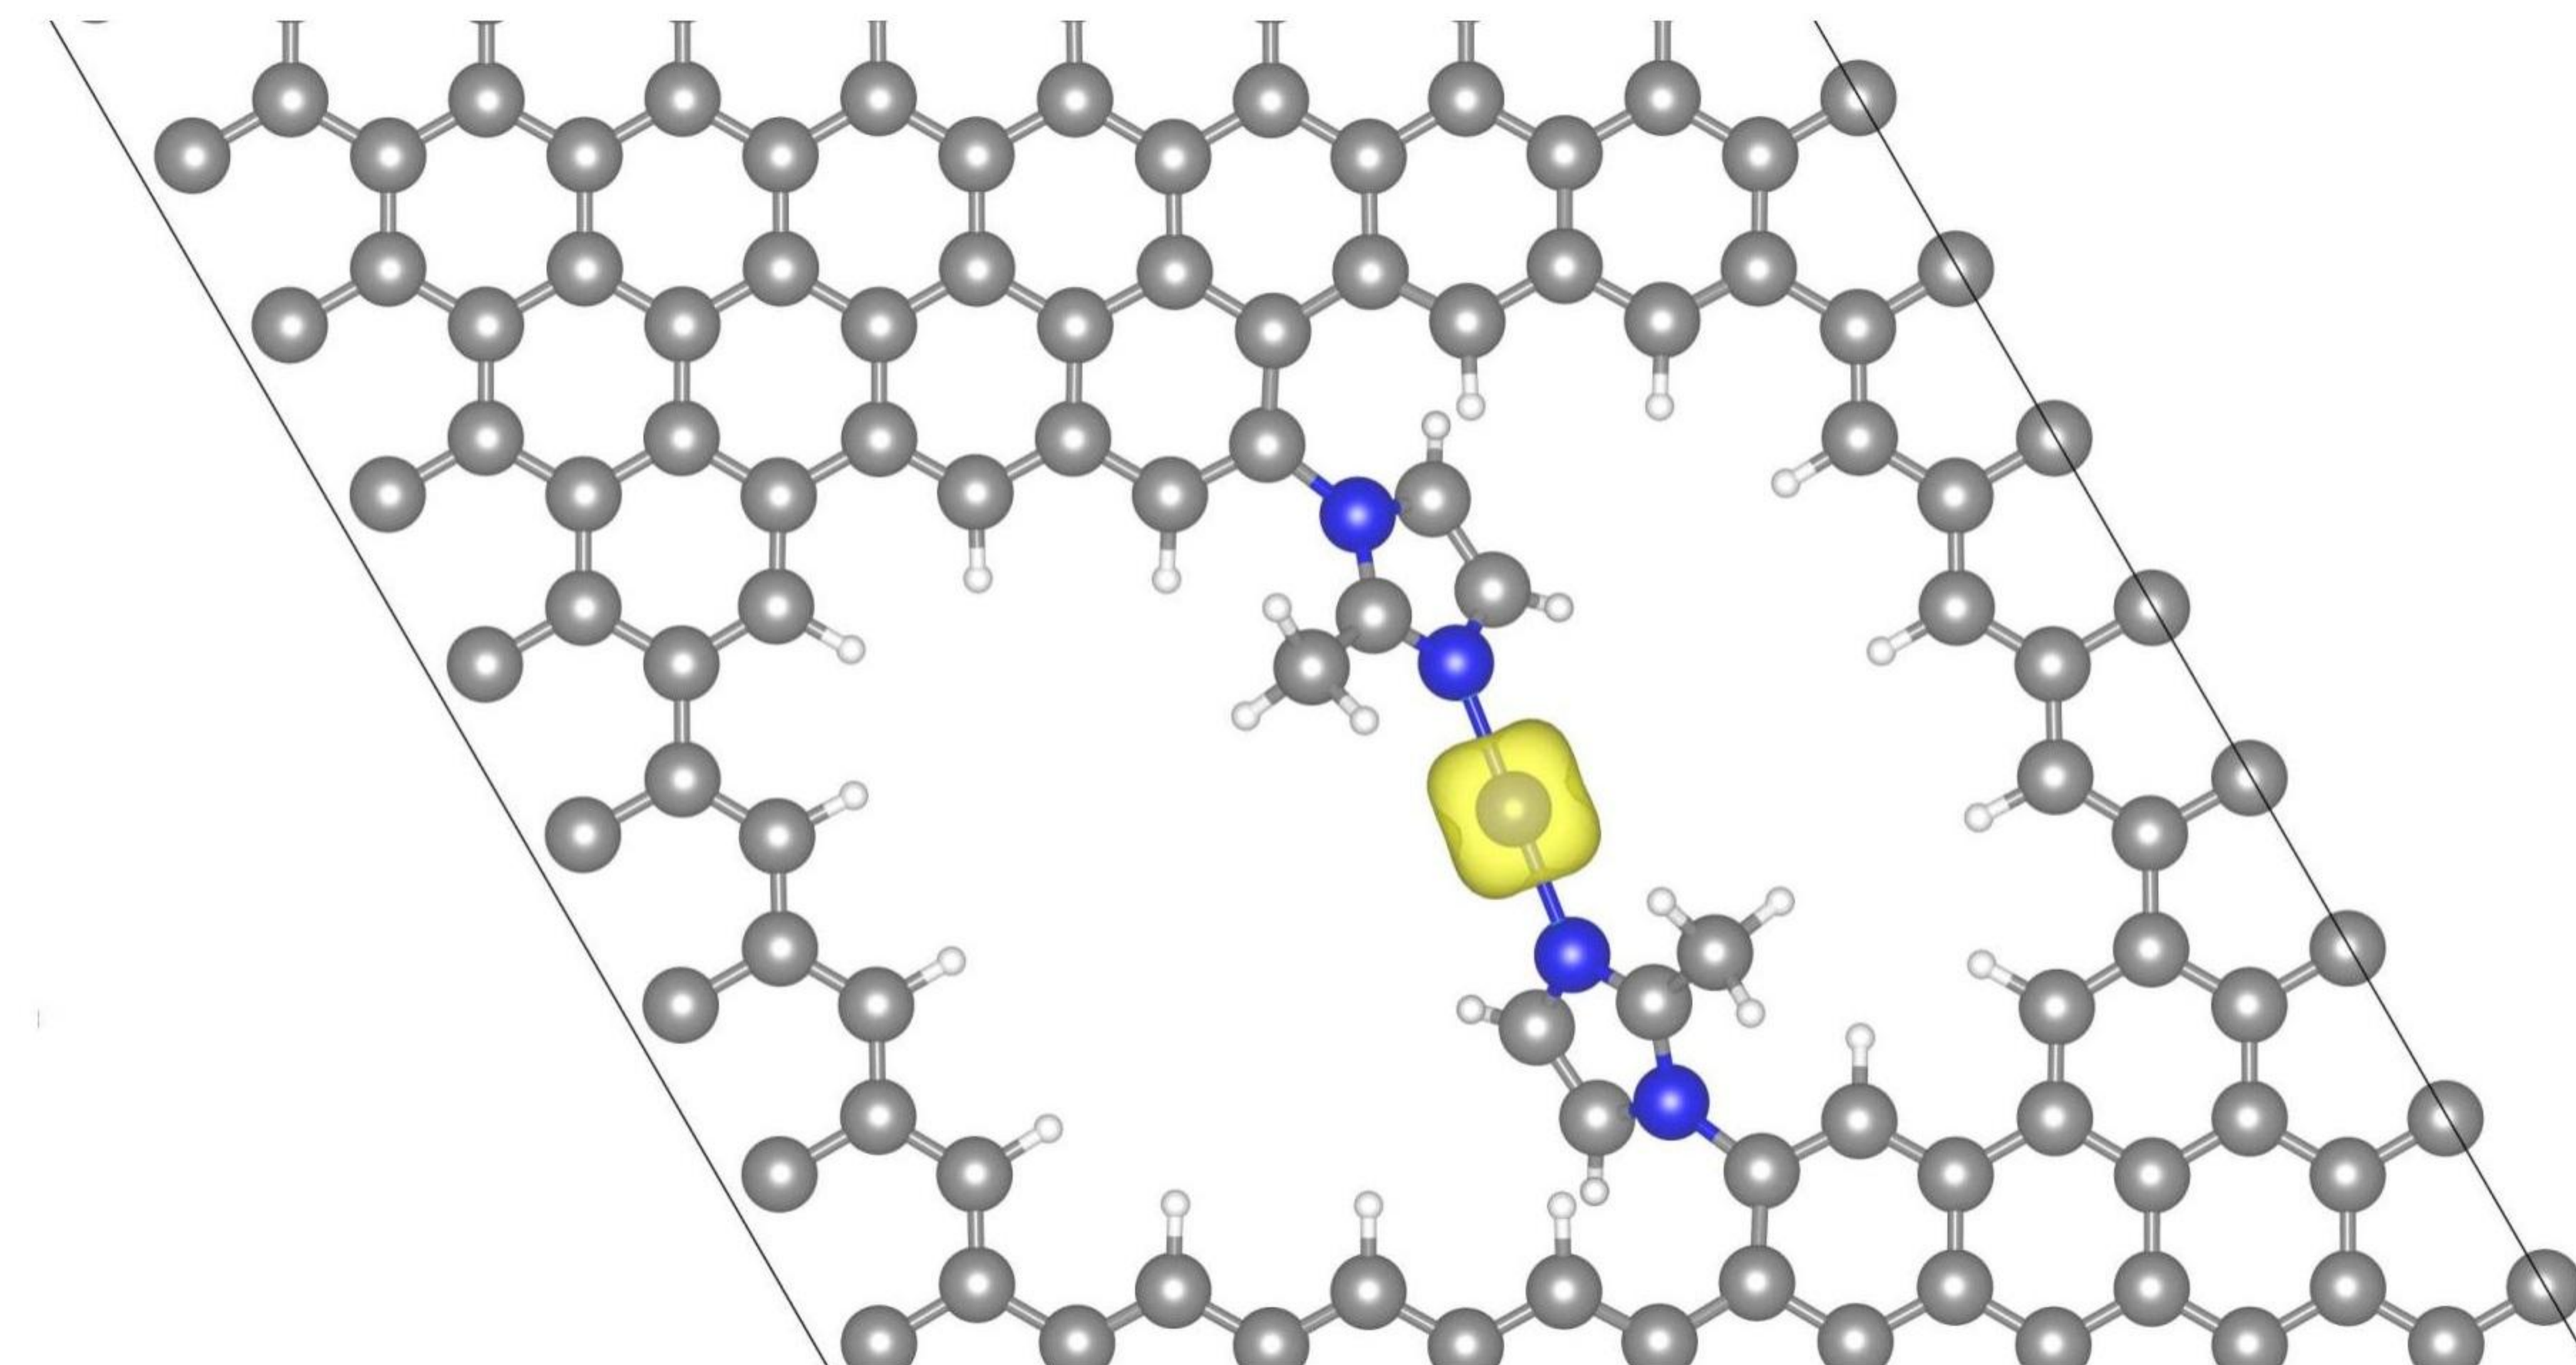

(c) Fe-(mIM)<sub>3</sub>

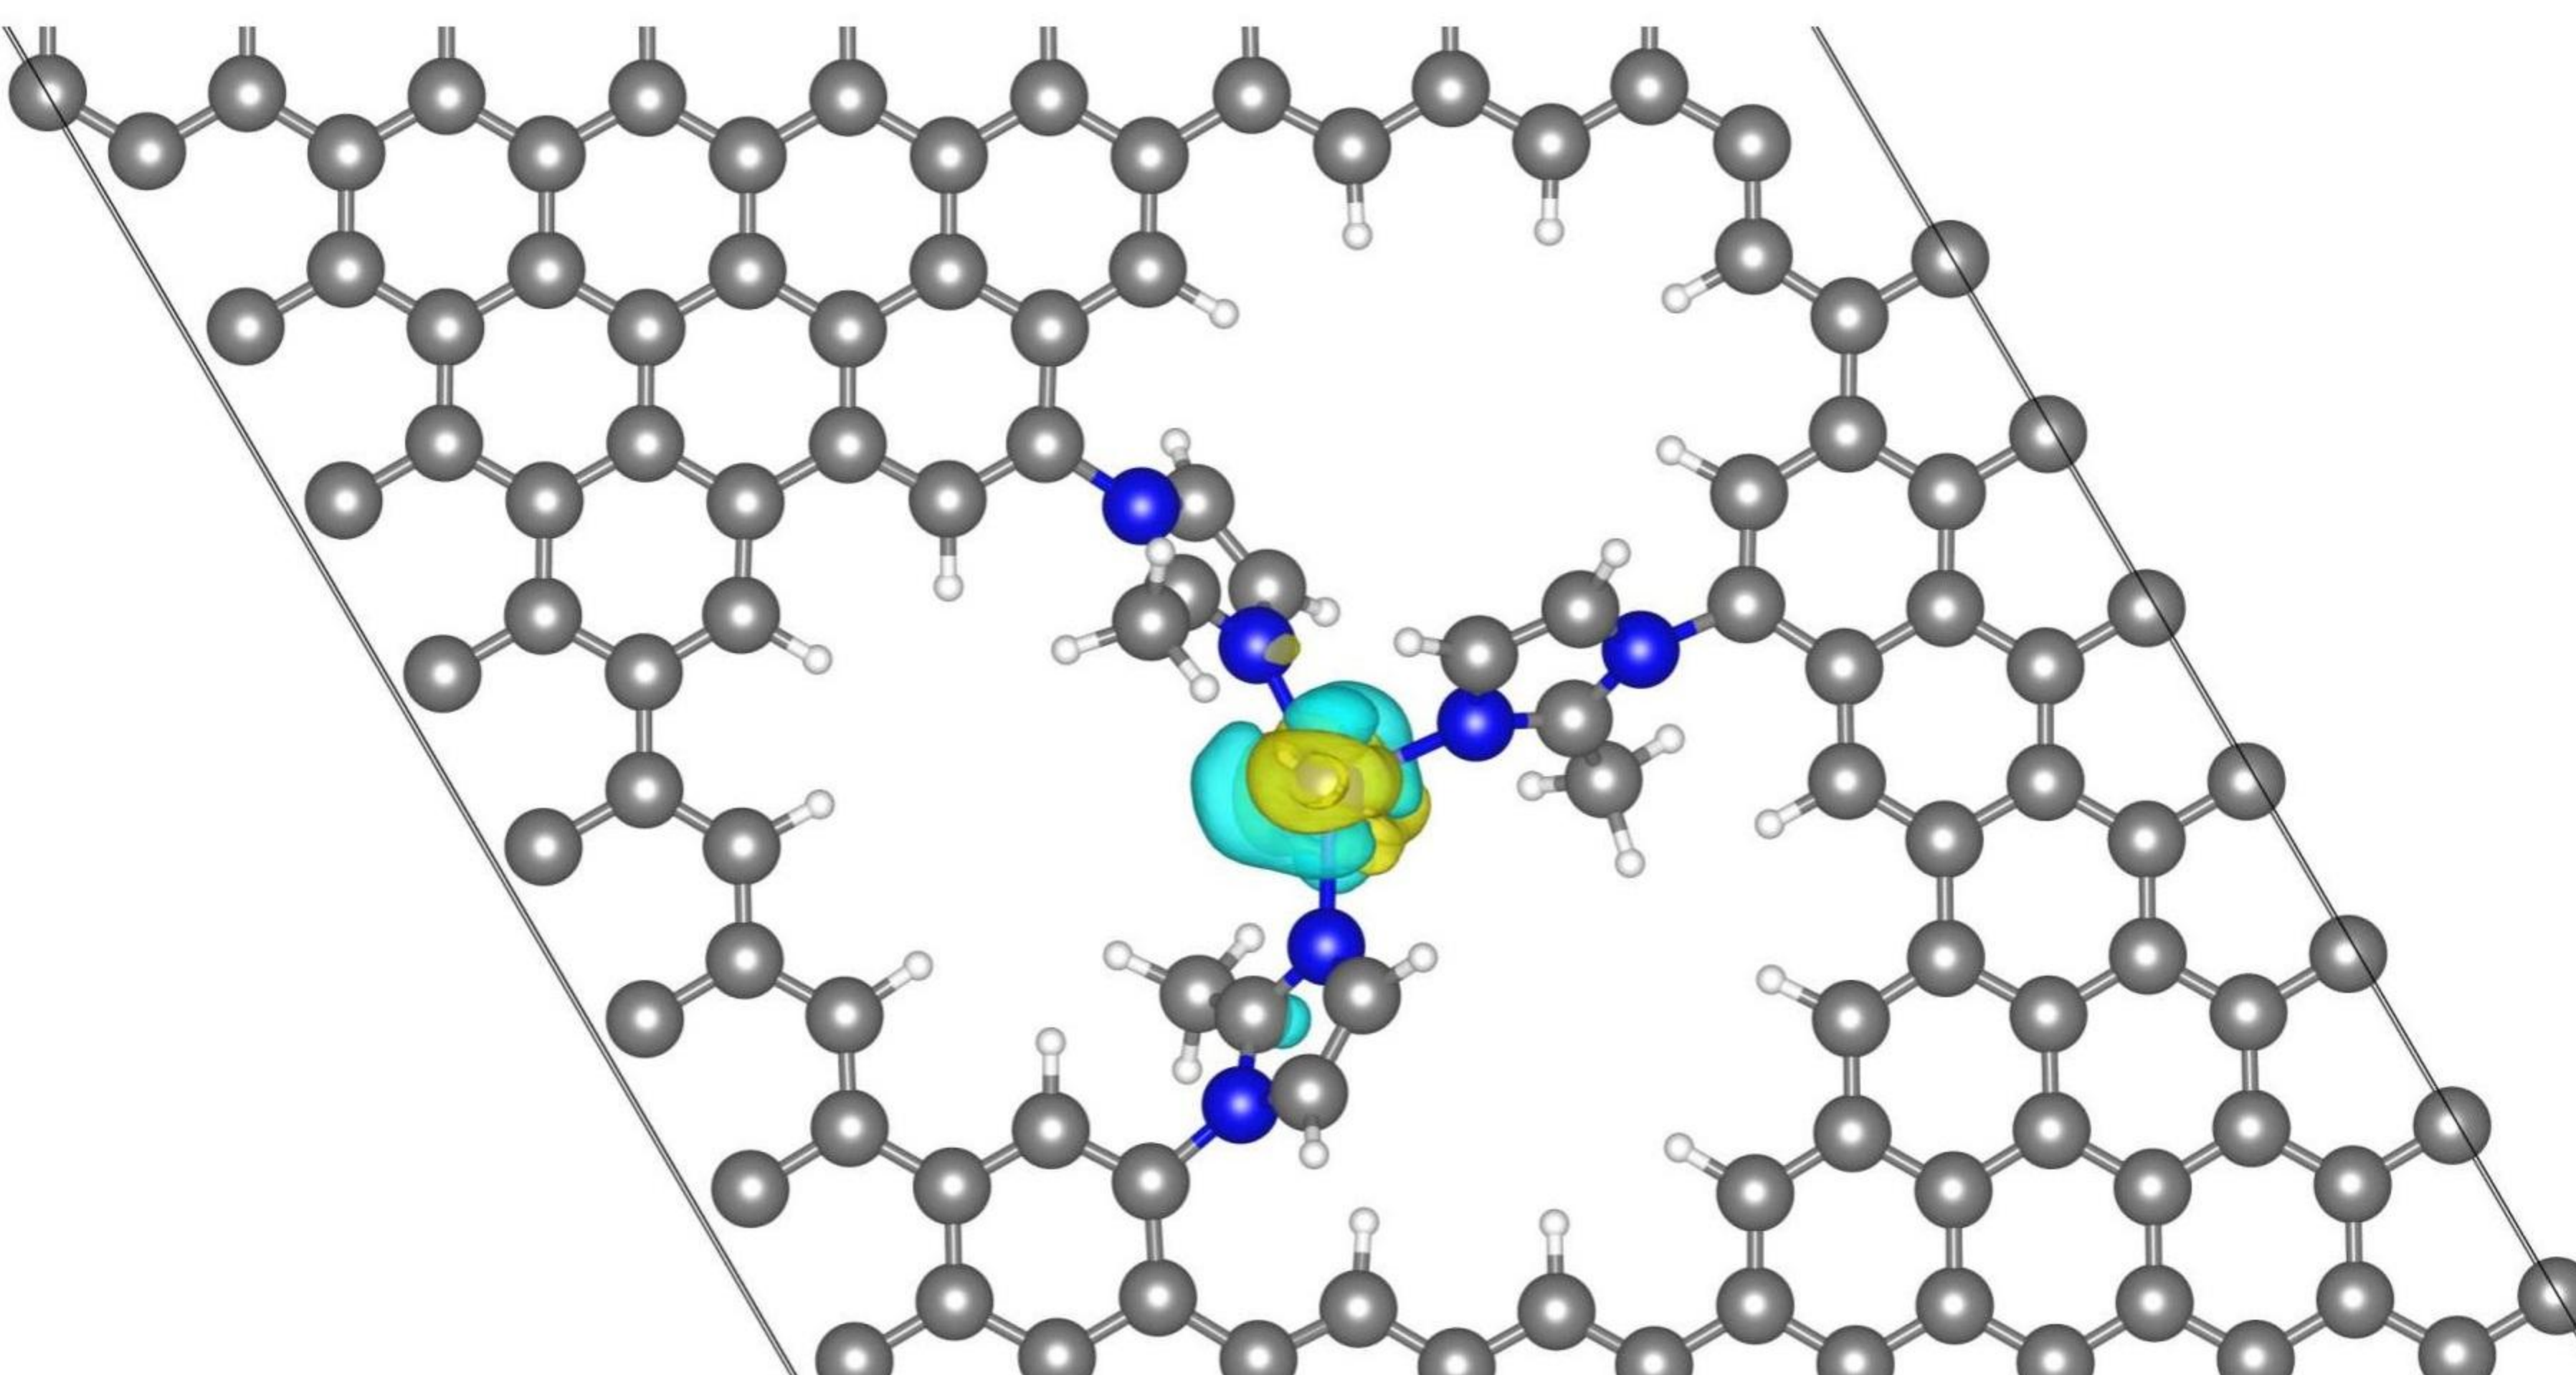

(d) Fe-(mIM)<sub>4</sub>

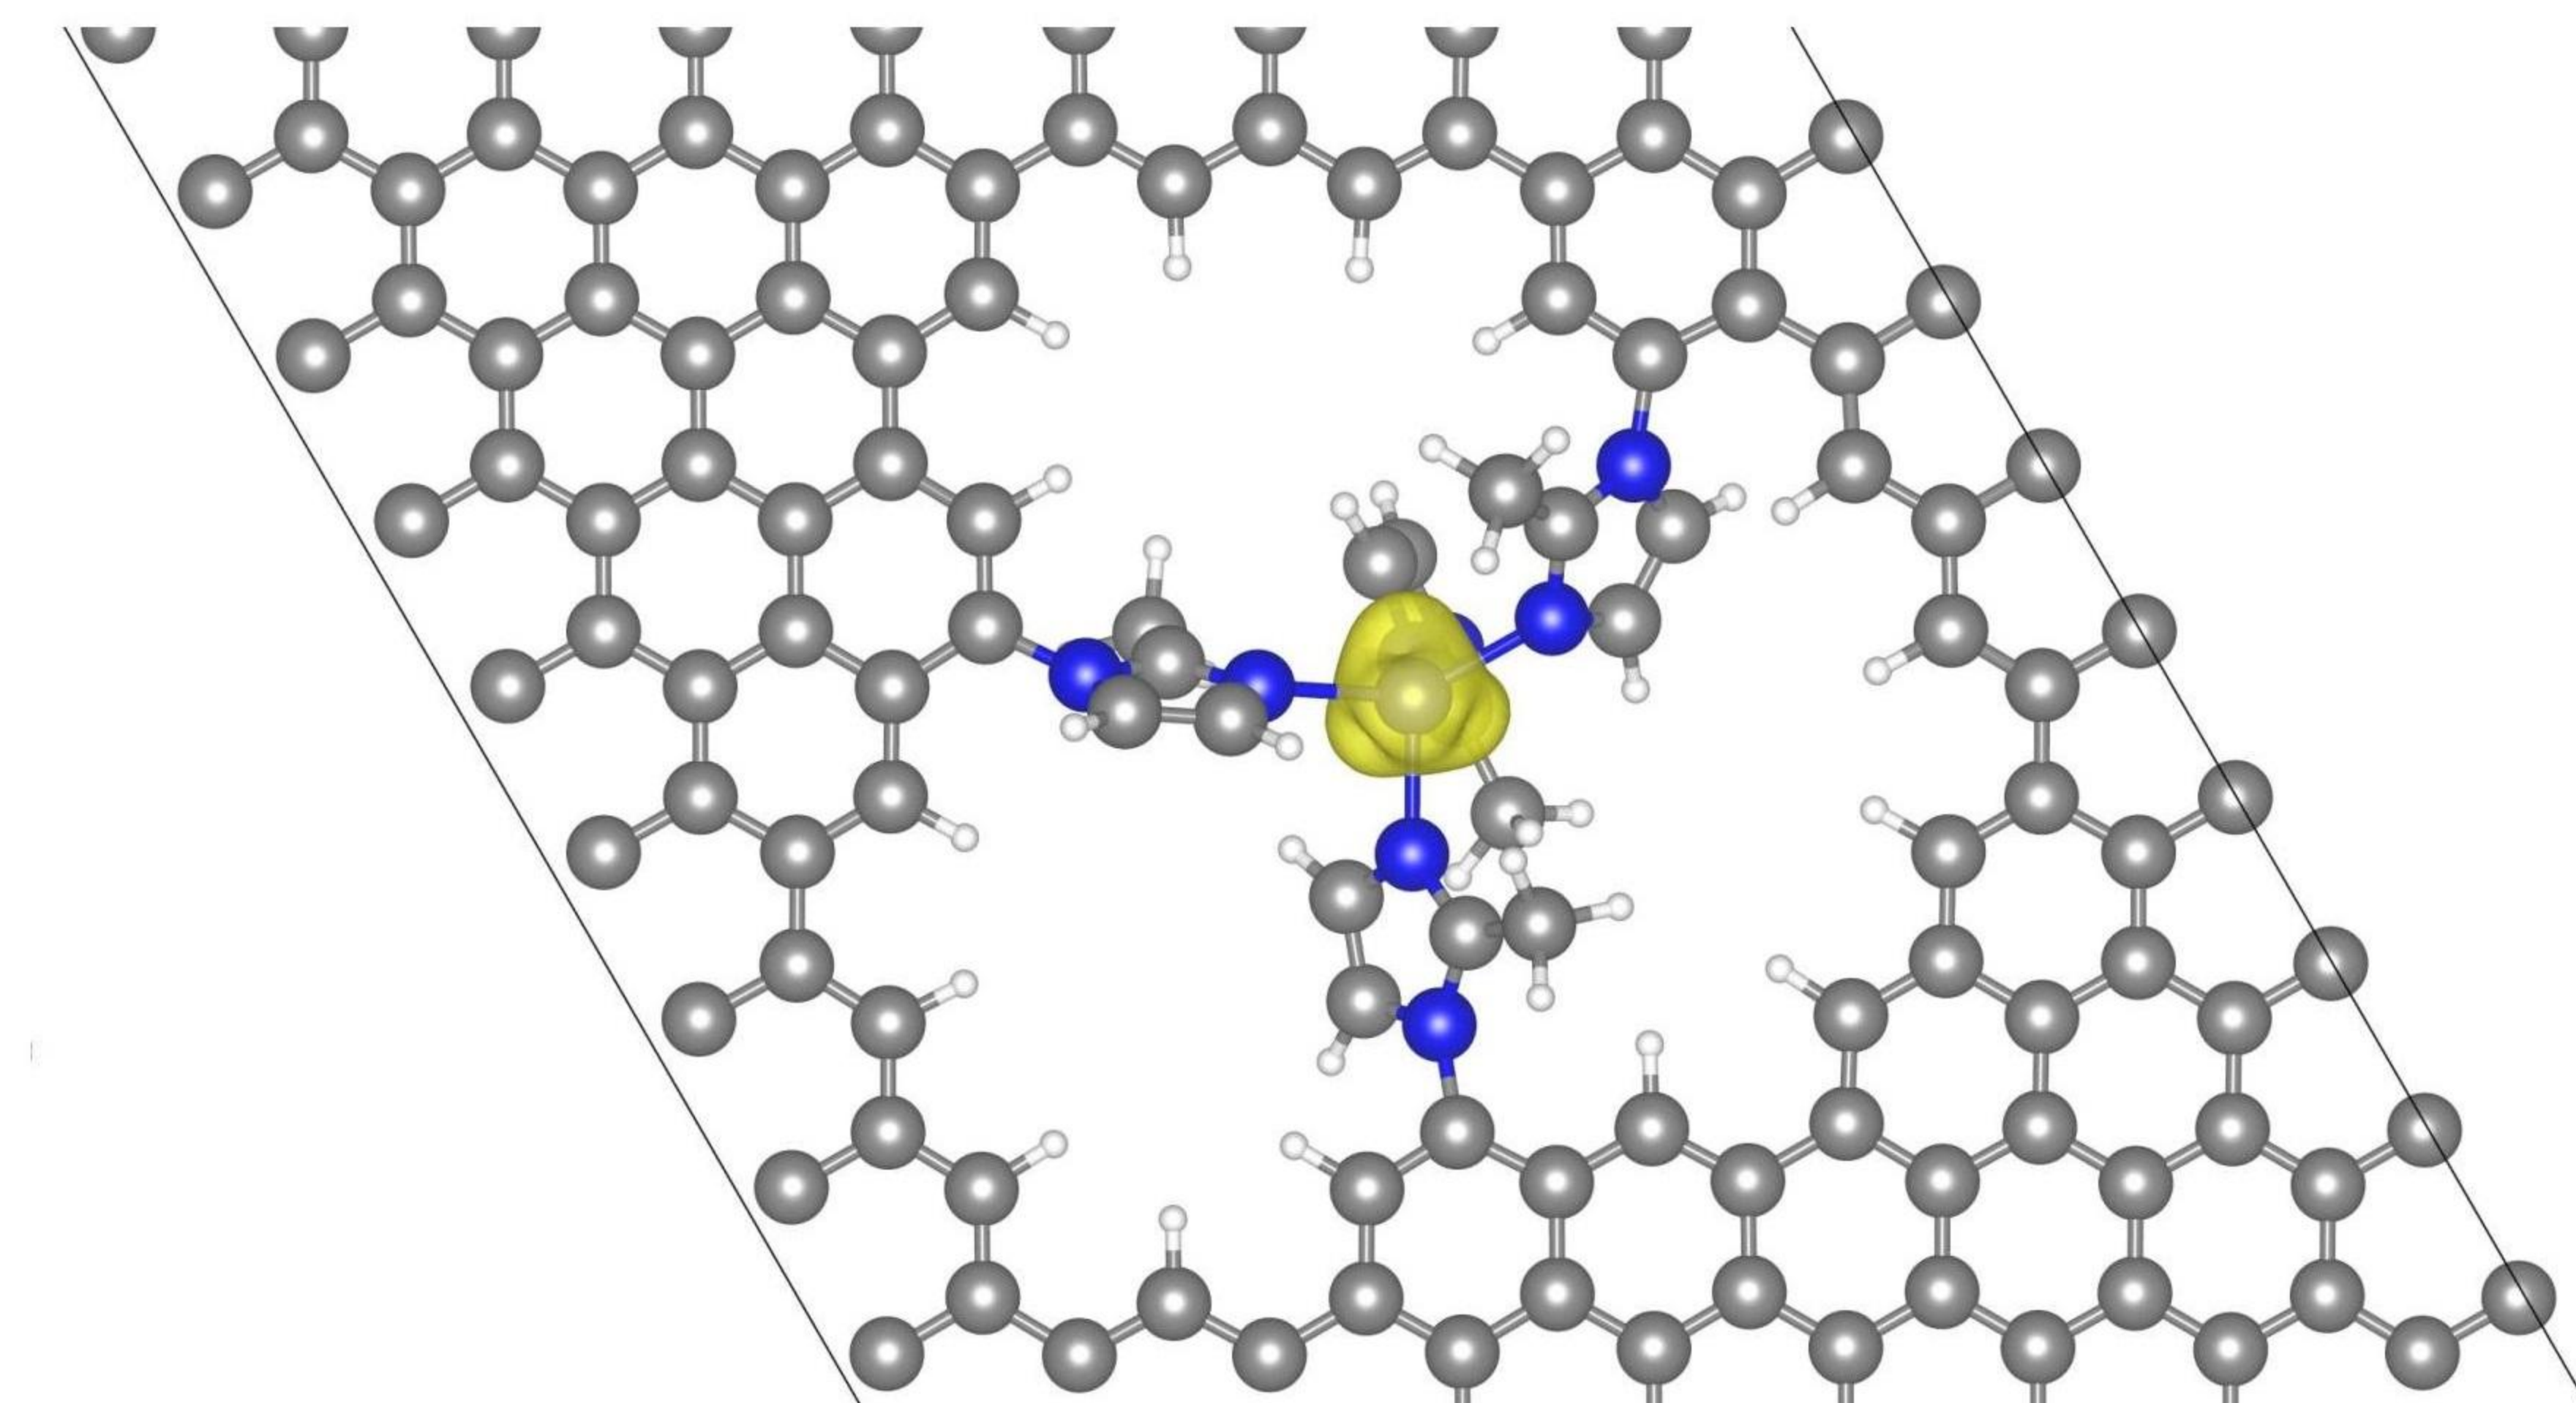

Supplement: d2cp06057d3.pdf [file d2cp06057d3.pdf]

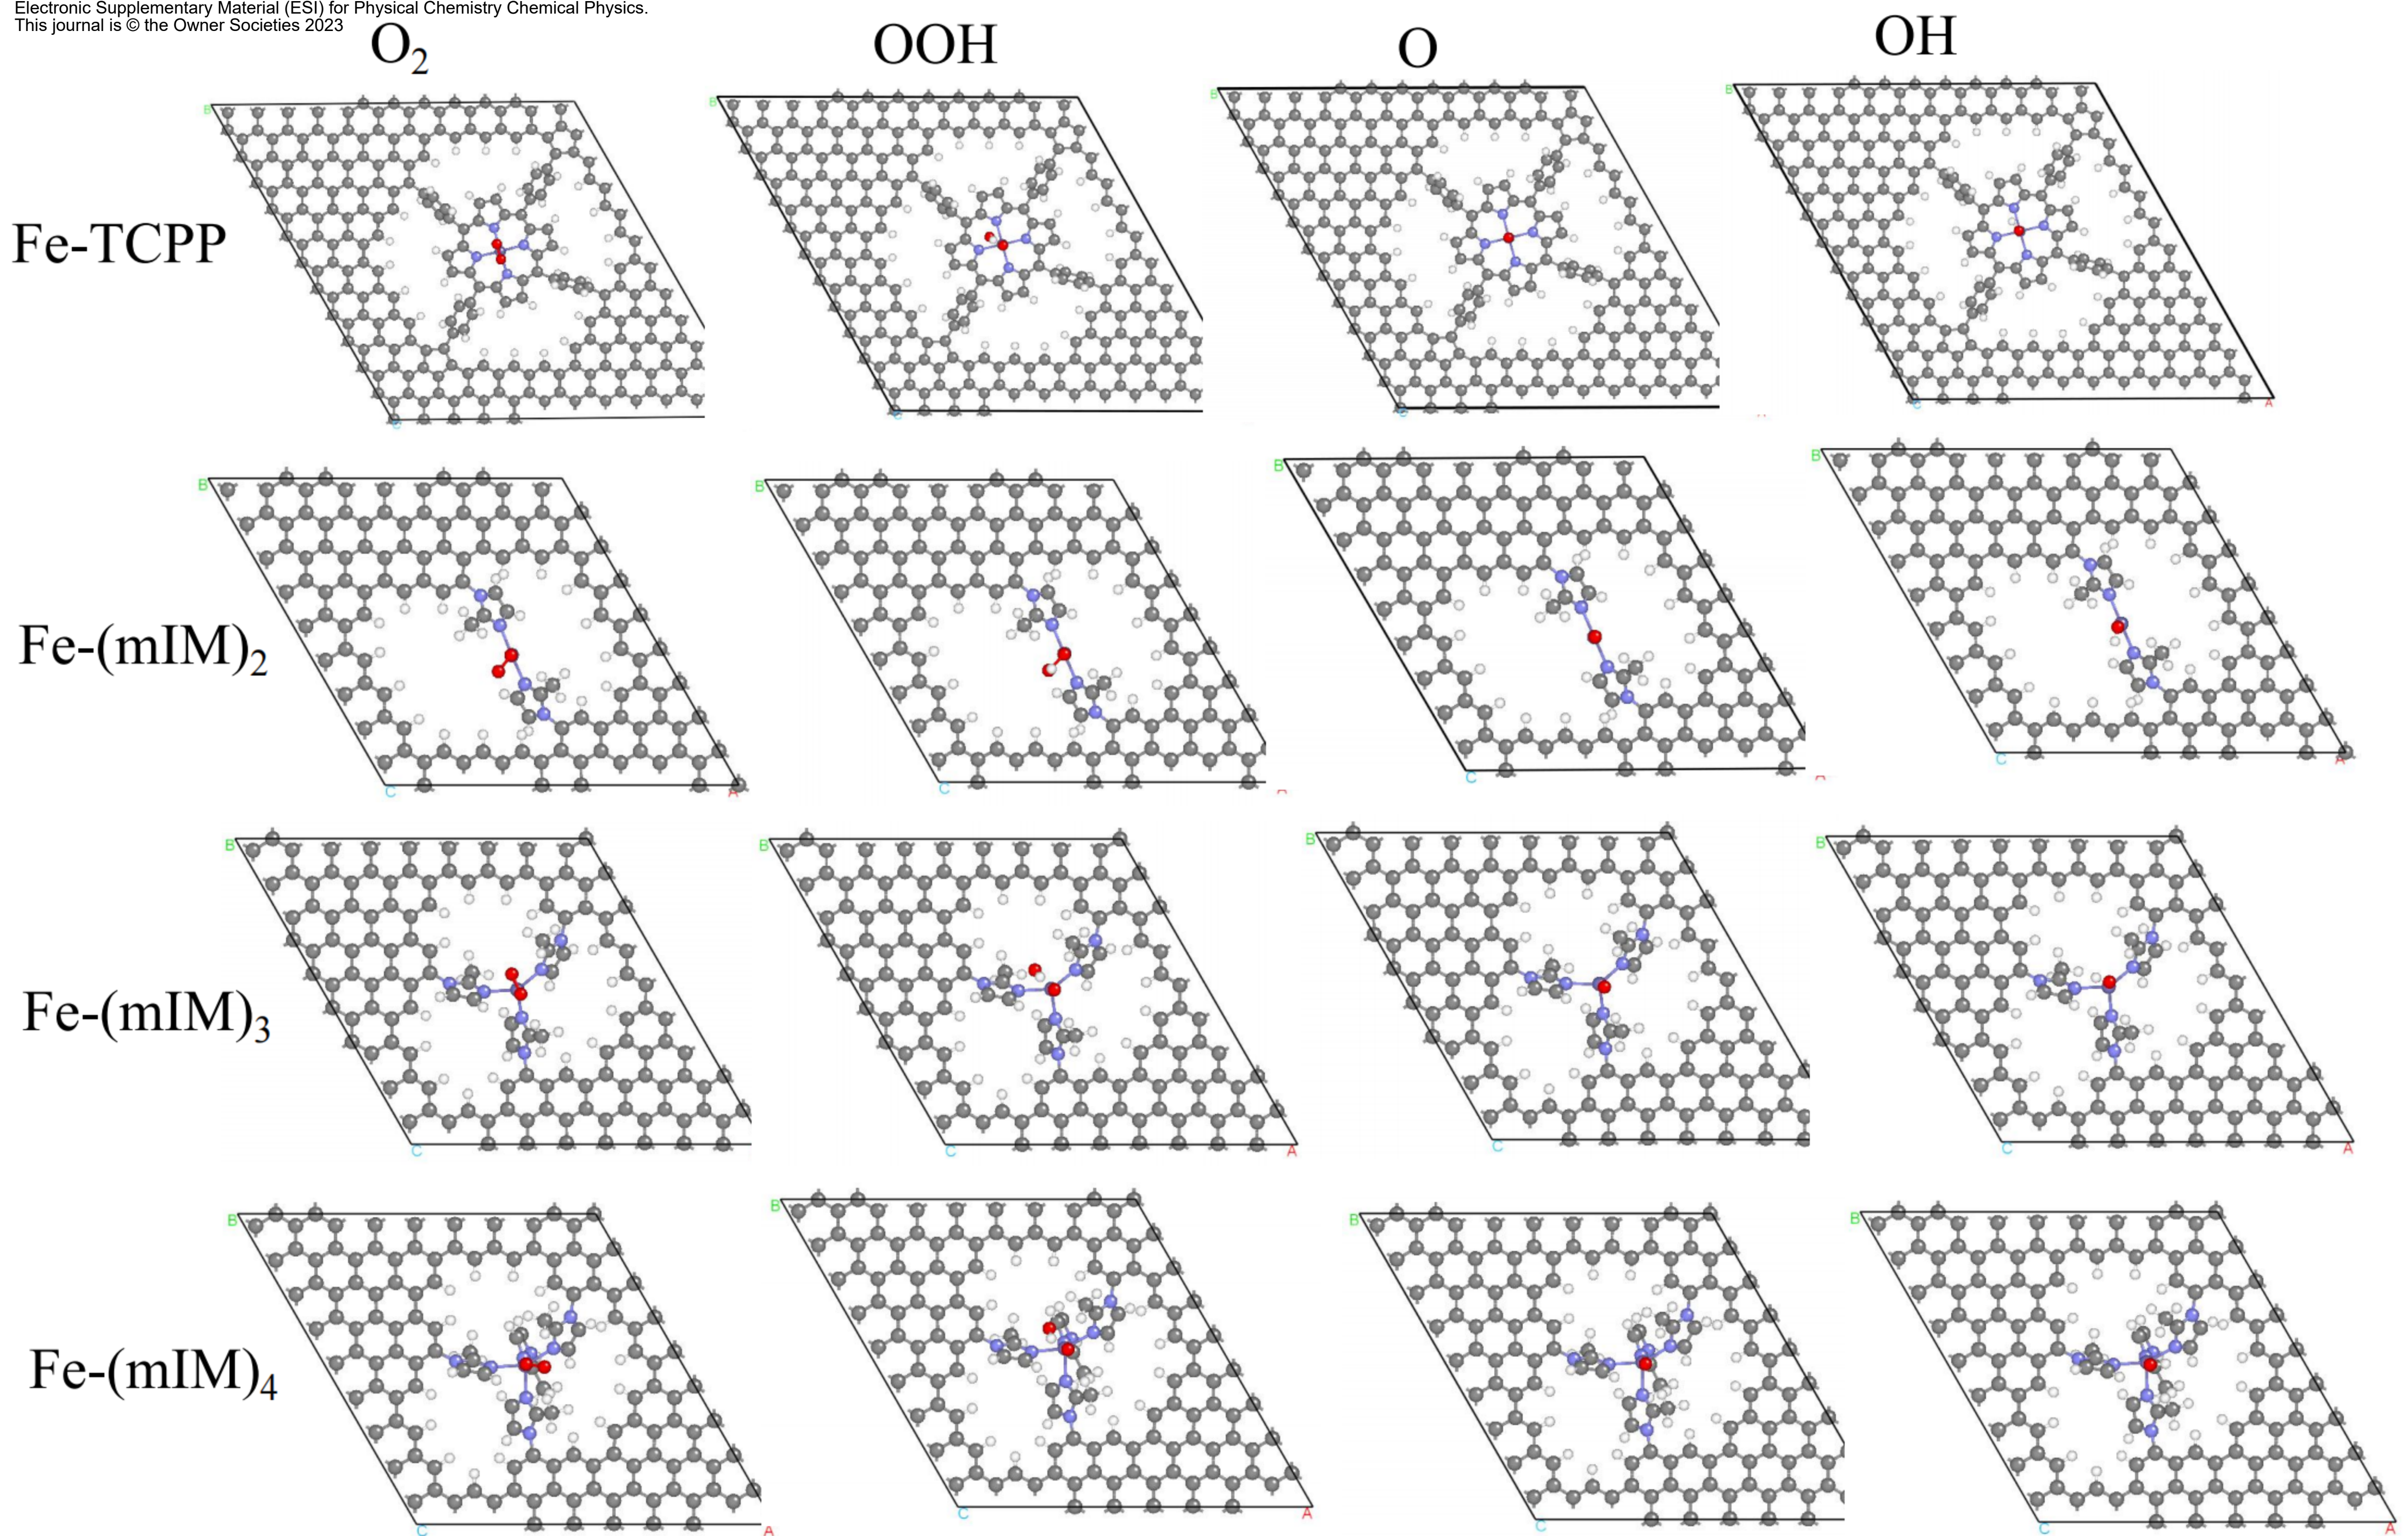

Supplement: d2cp06057d4.pdf [file d2cp06057d4.pdf]

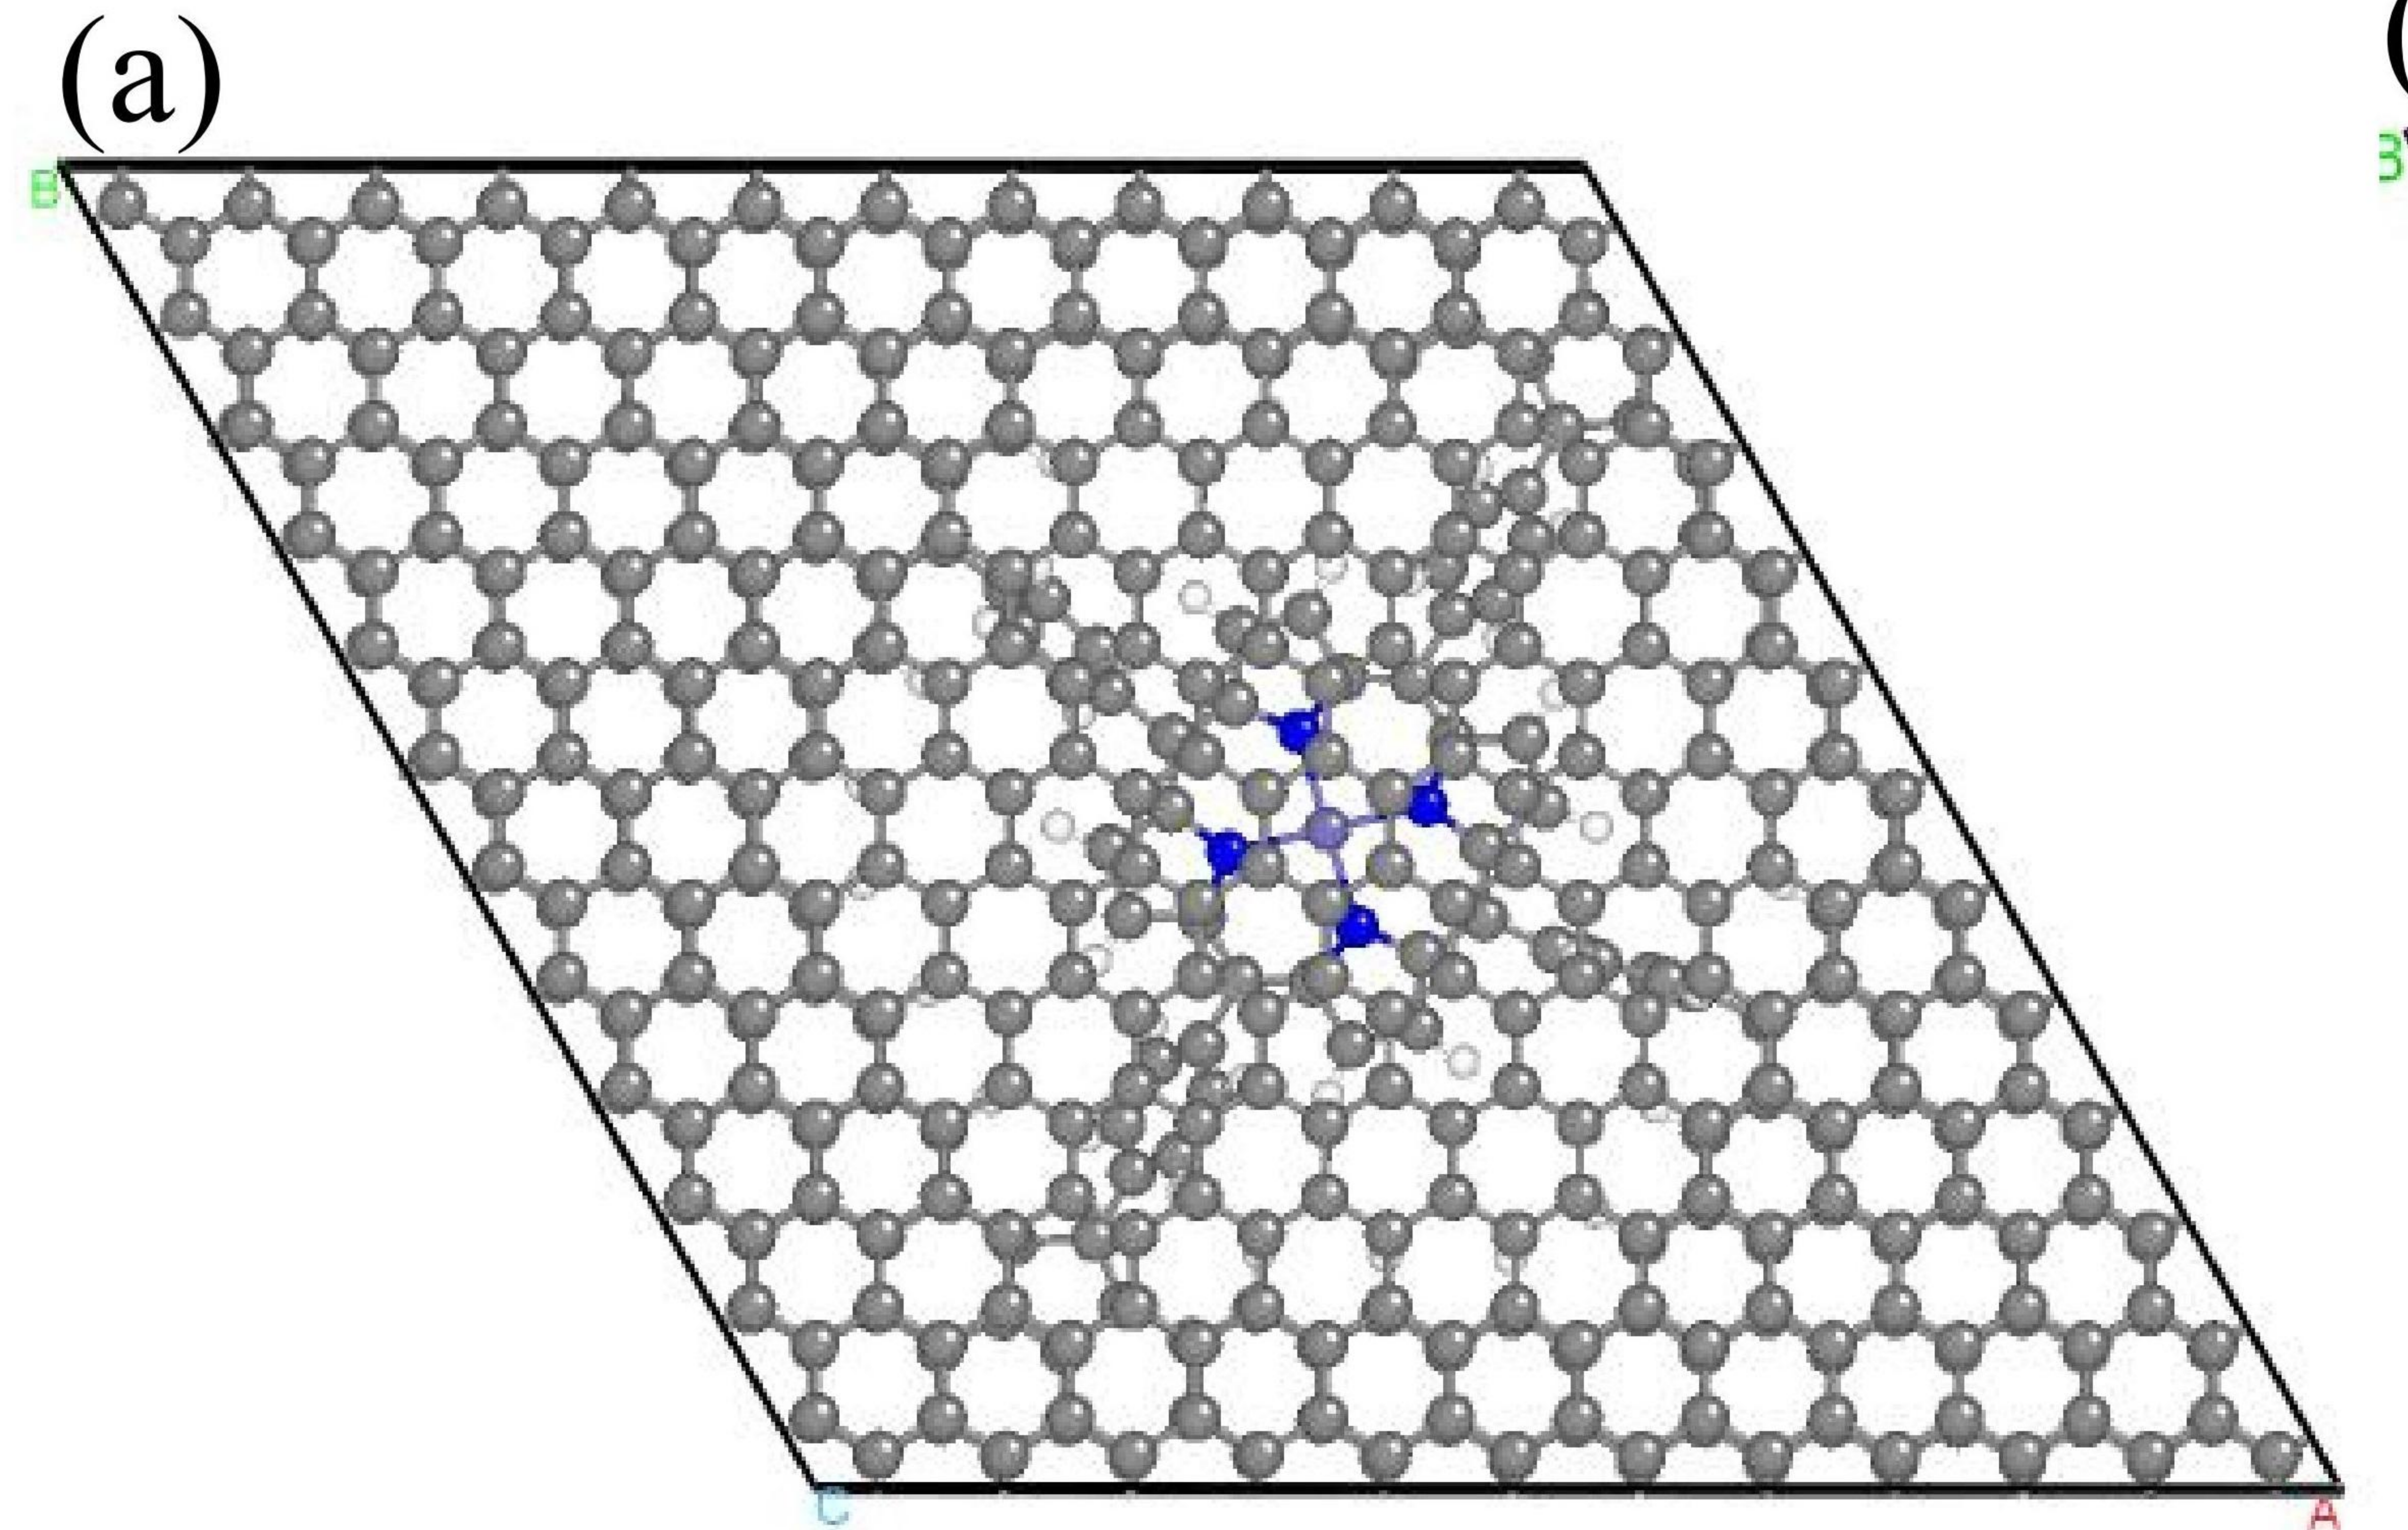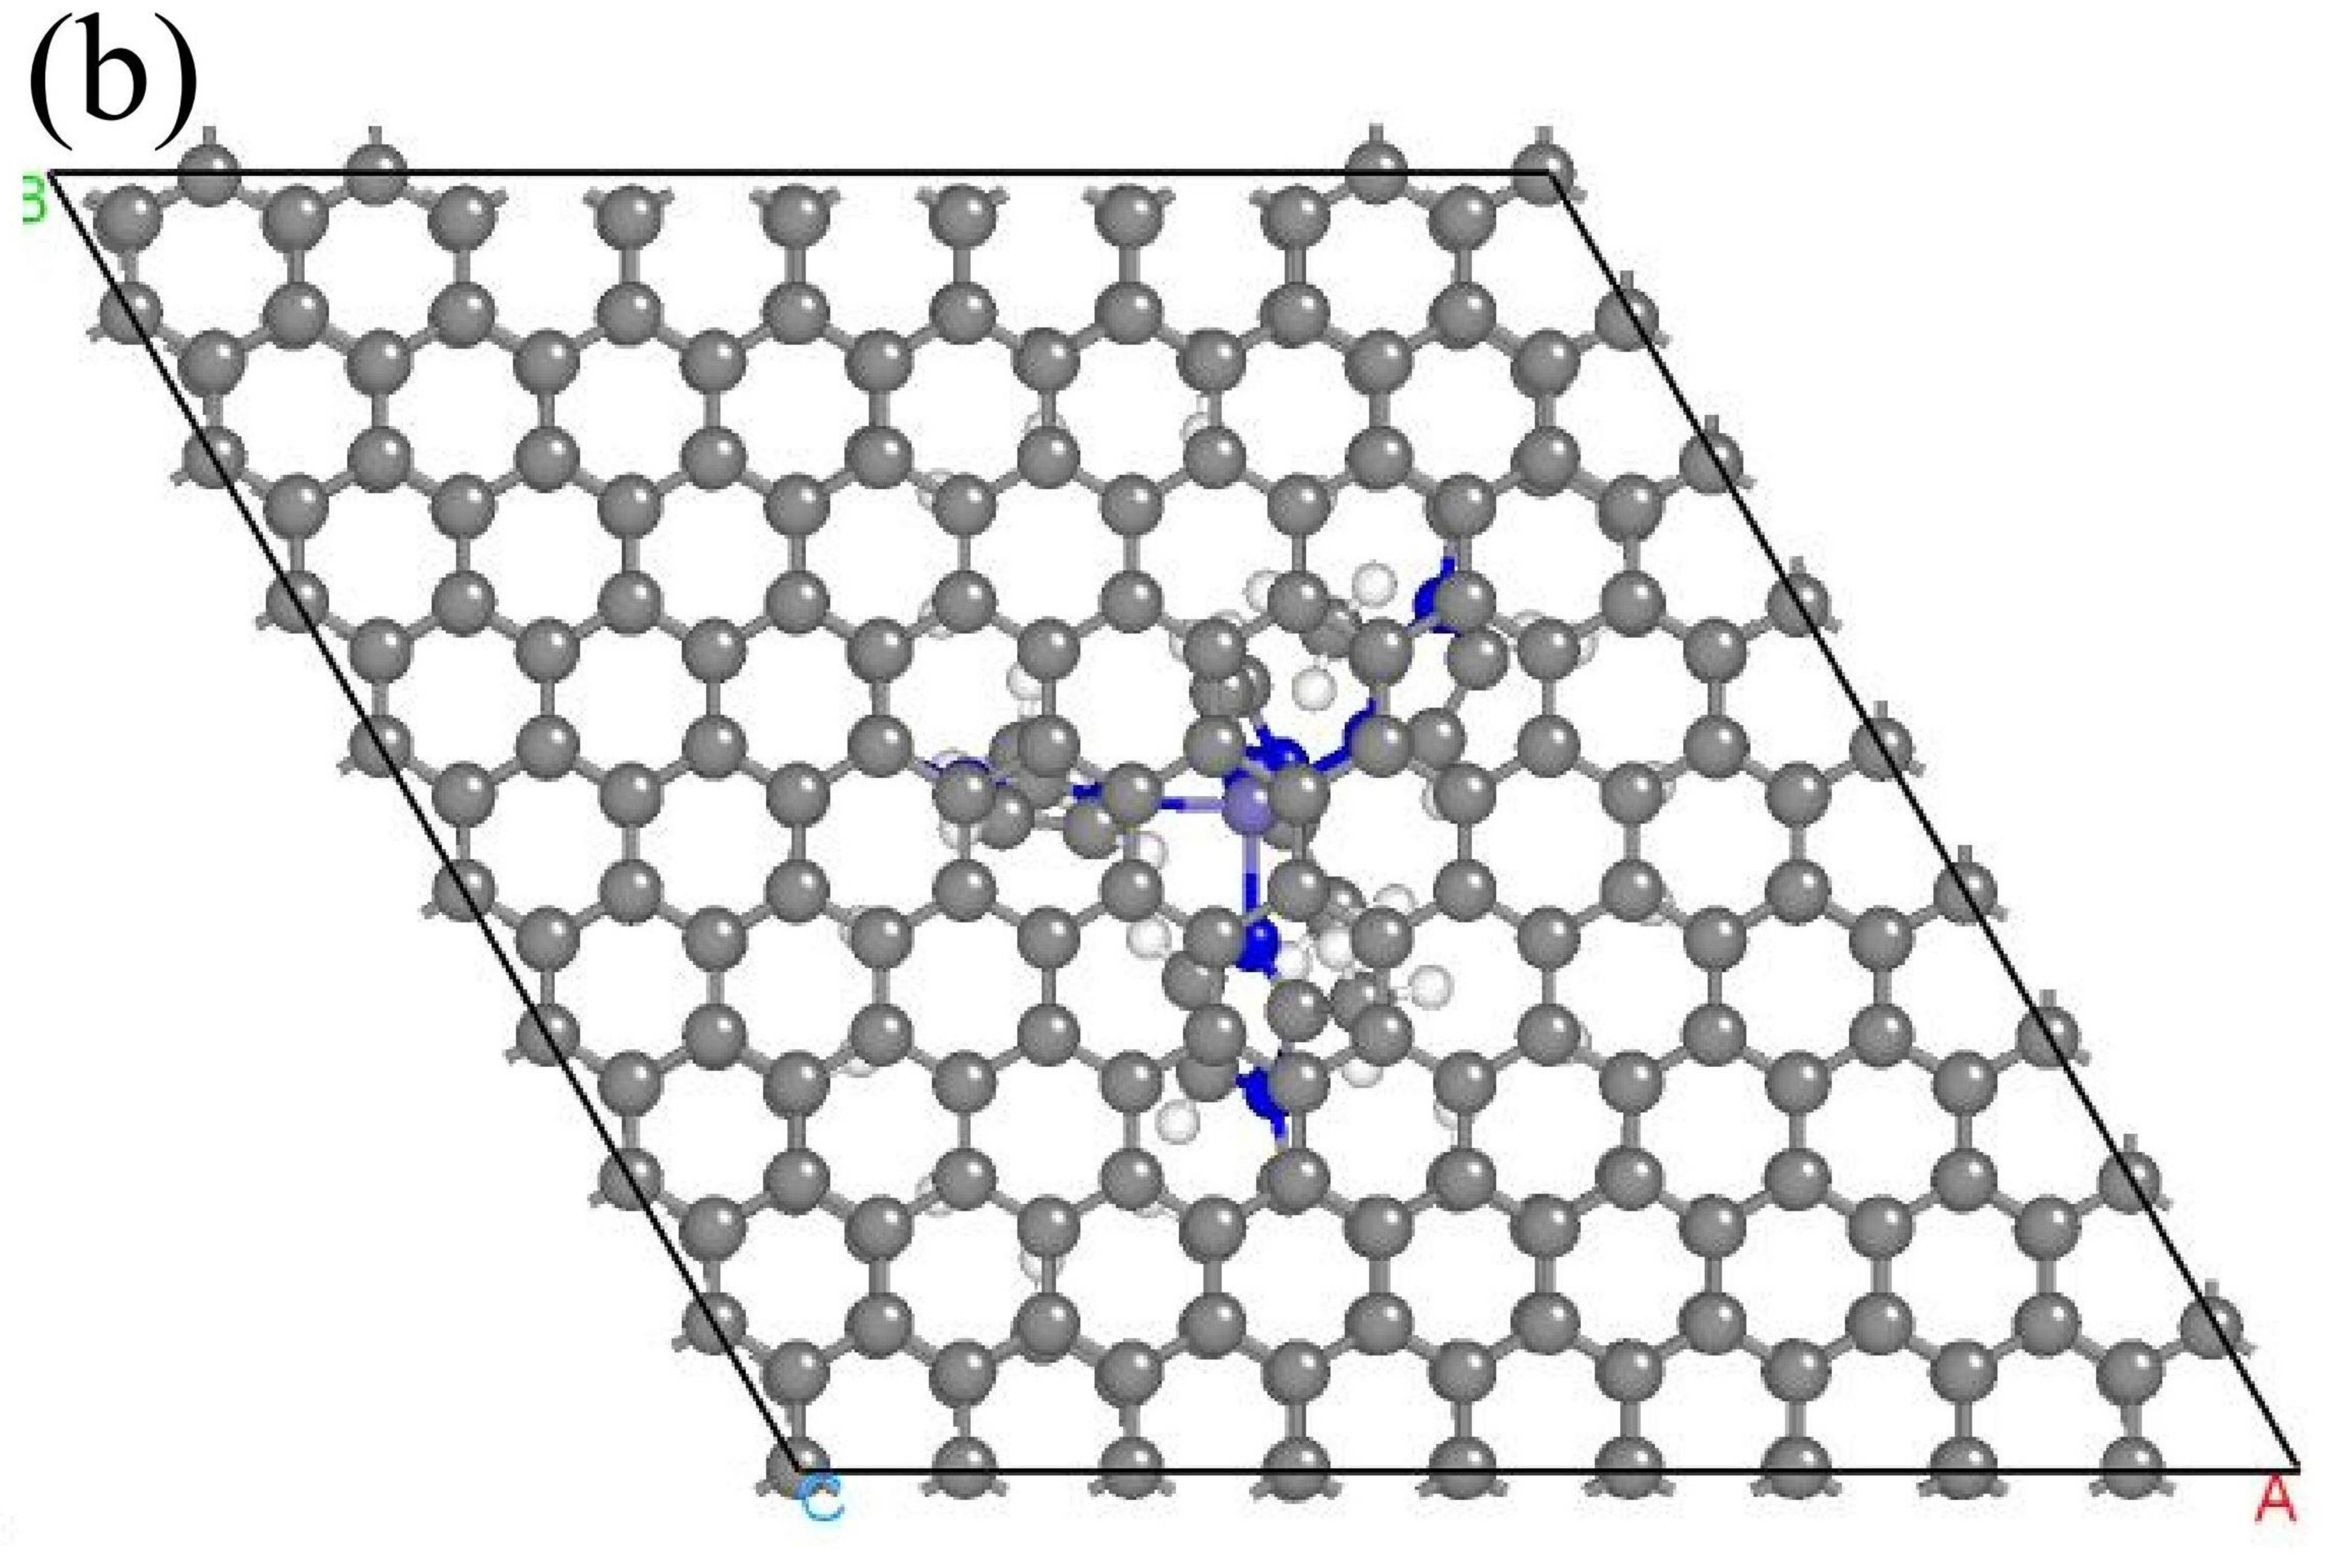

Supplement: d2cp06057d5.pdf [file d2cp06057d5.pdf]

(a) Fe-TCPP\_bpy

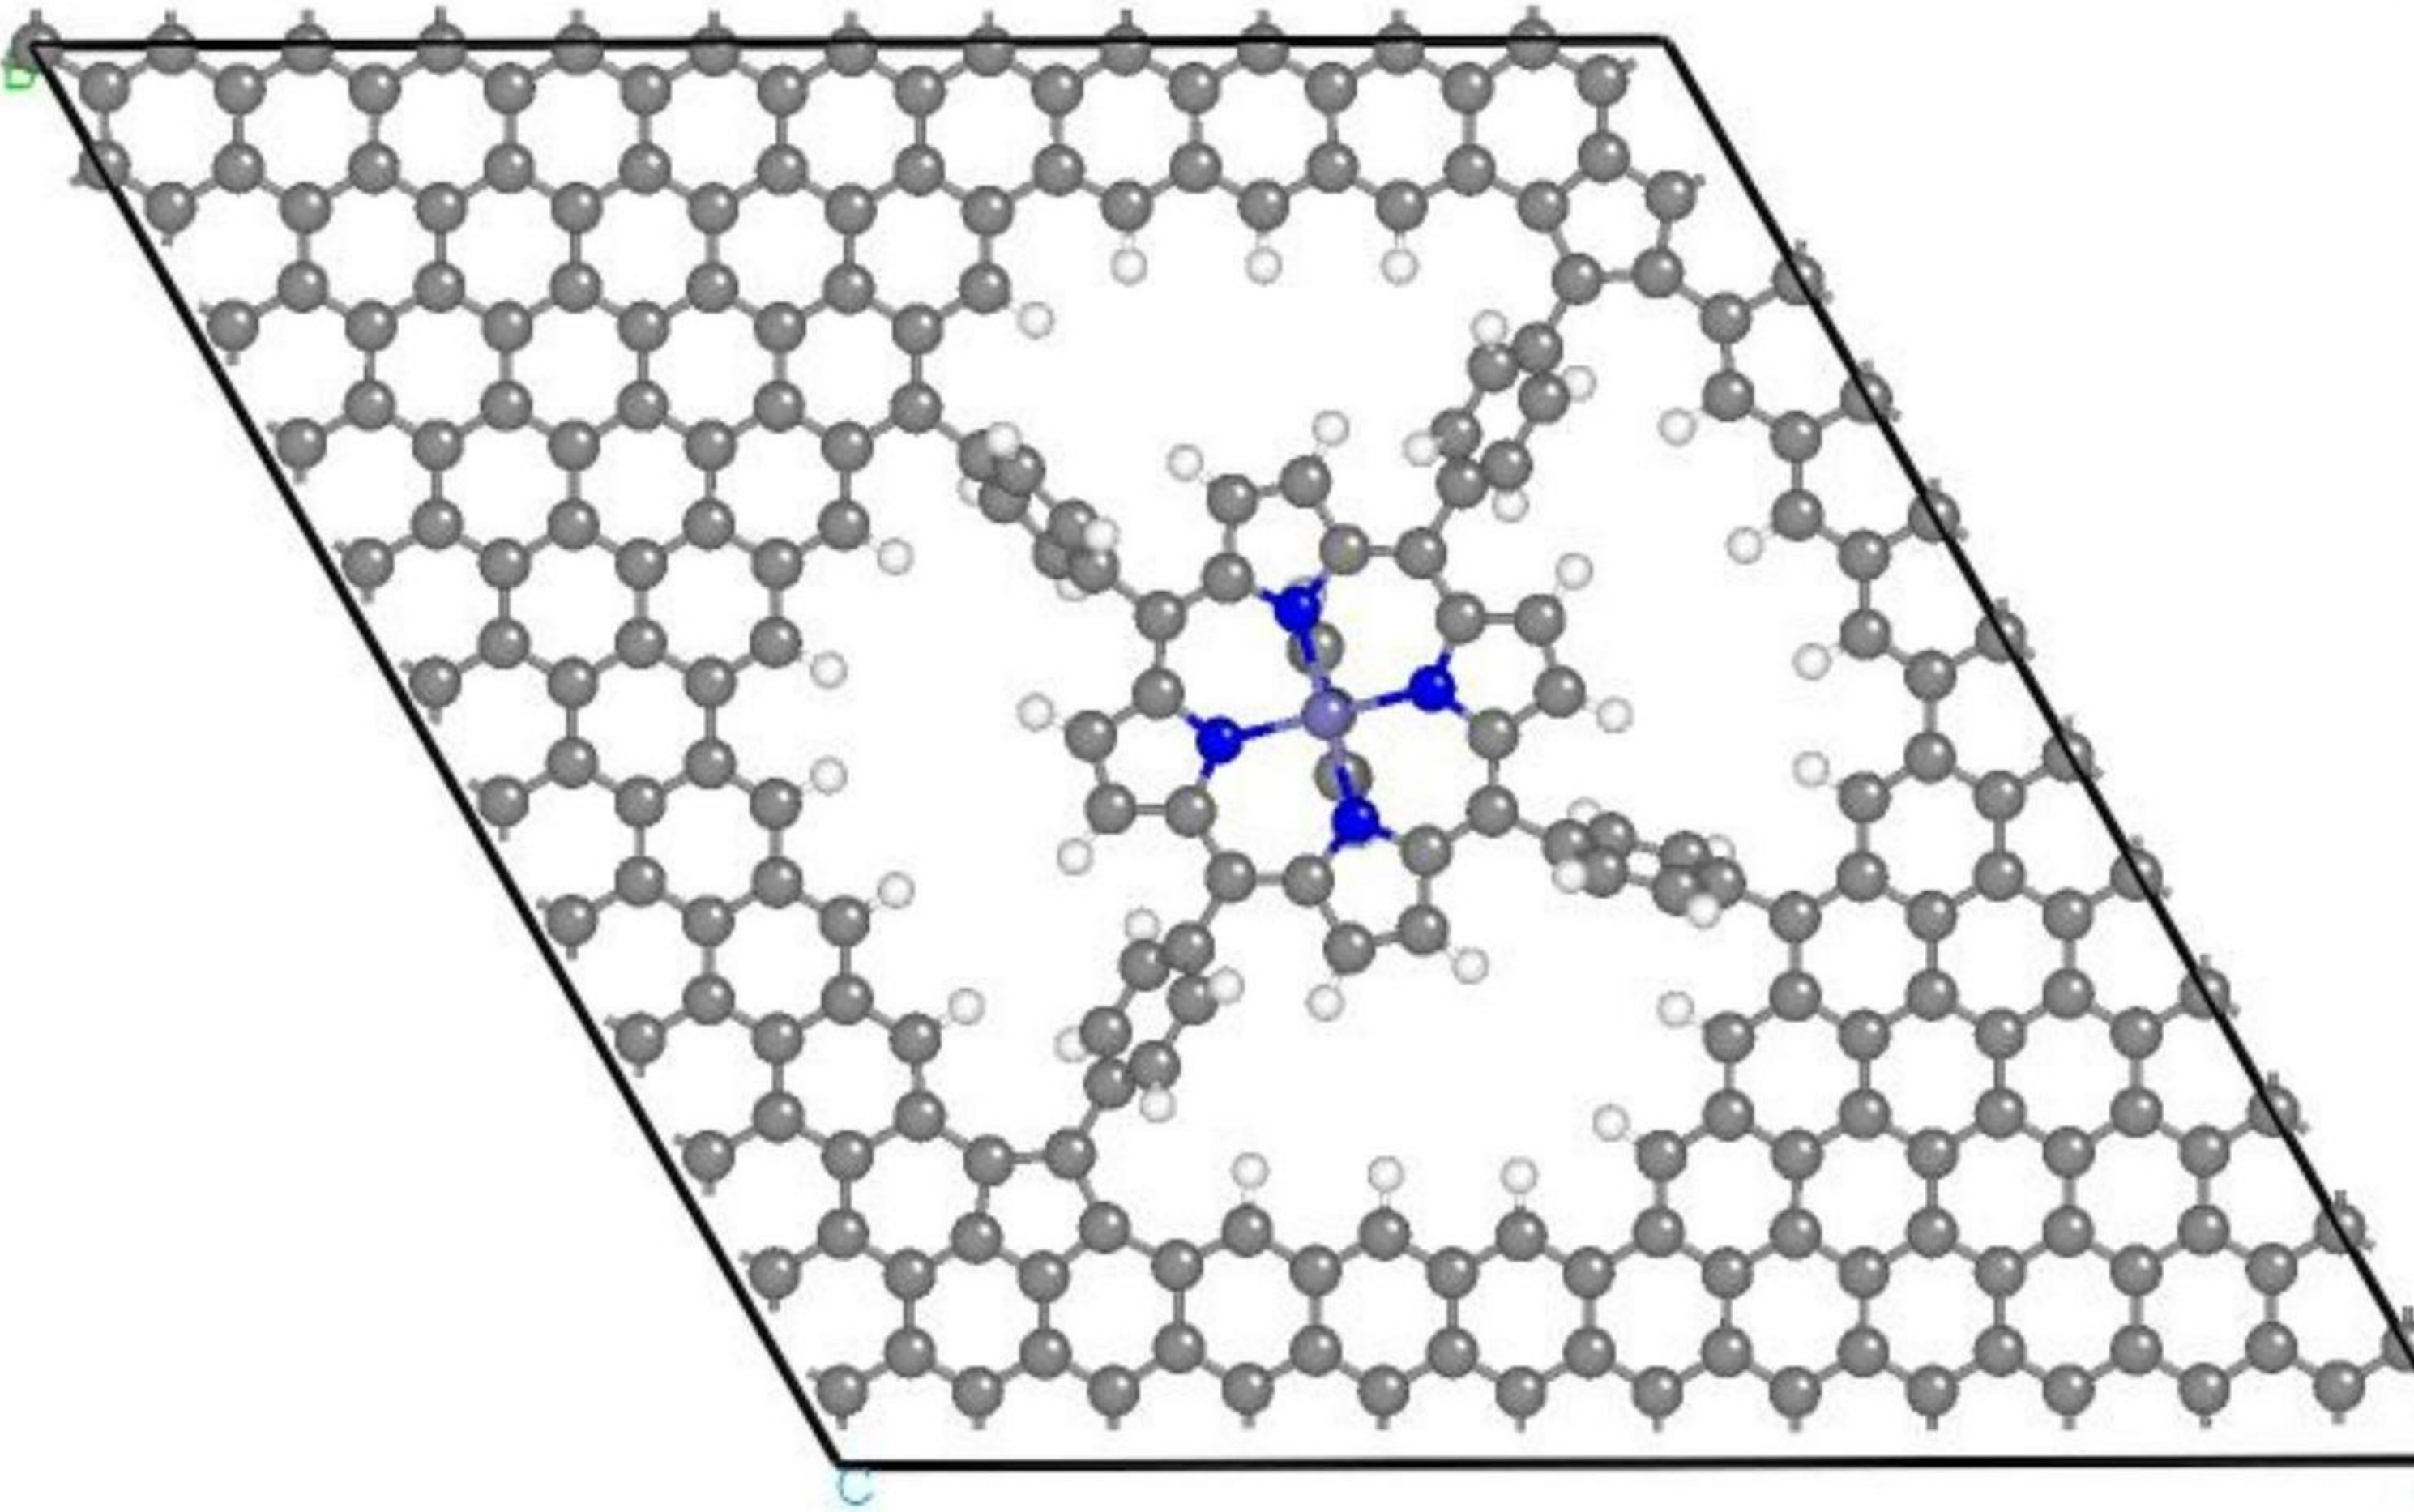

(b) Fe-TCPP\_pya

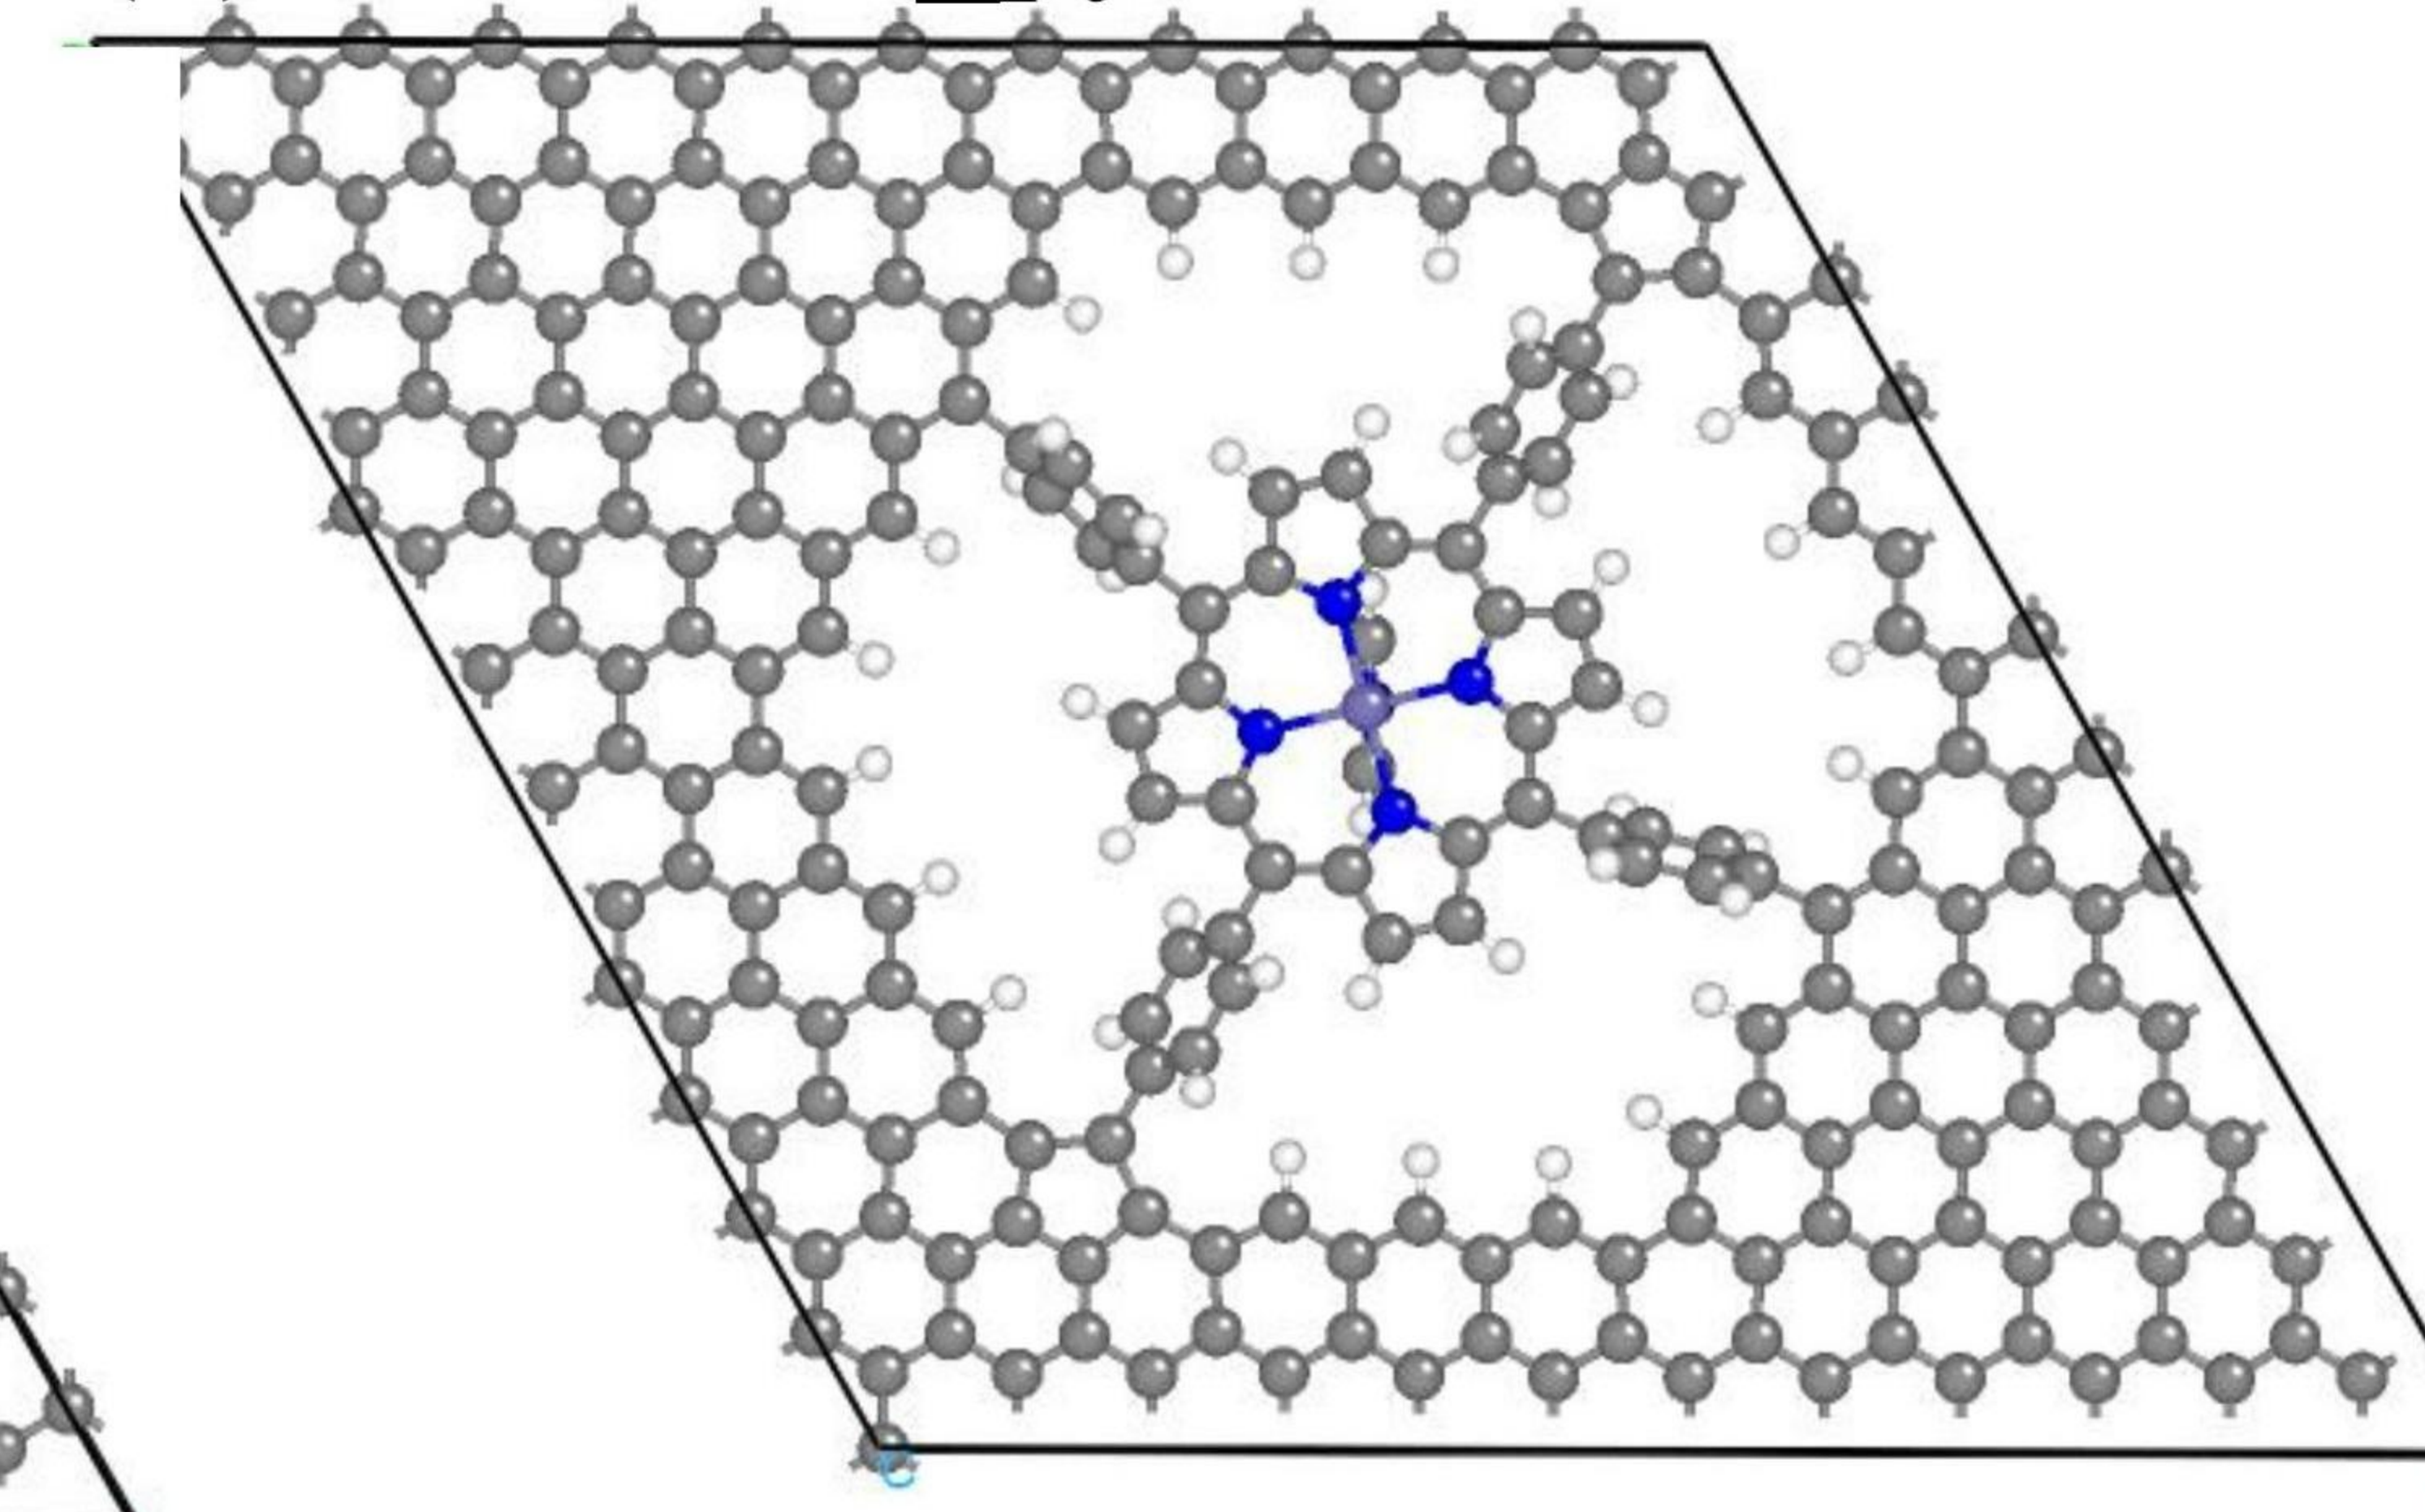

(c) Fe-TCPP\_CH<sub>3</sub>

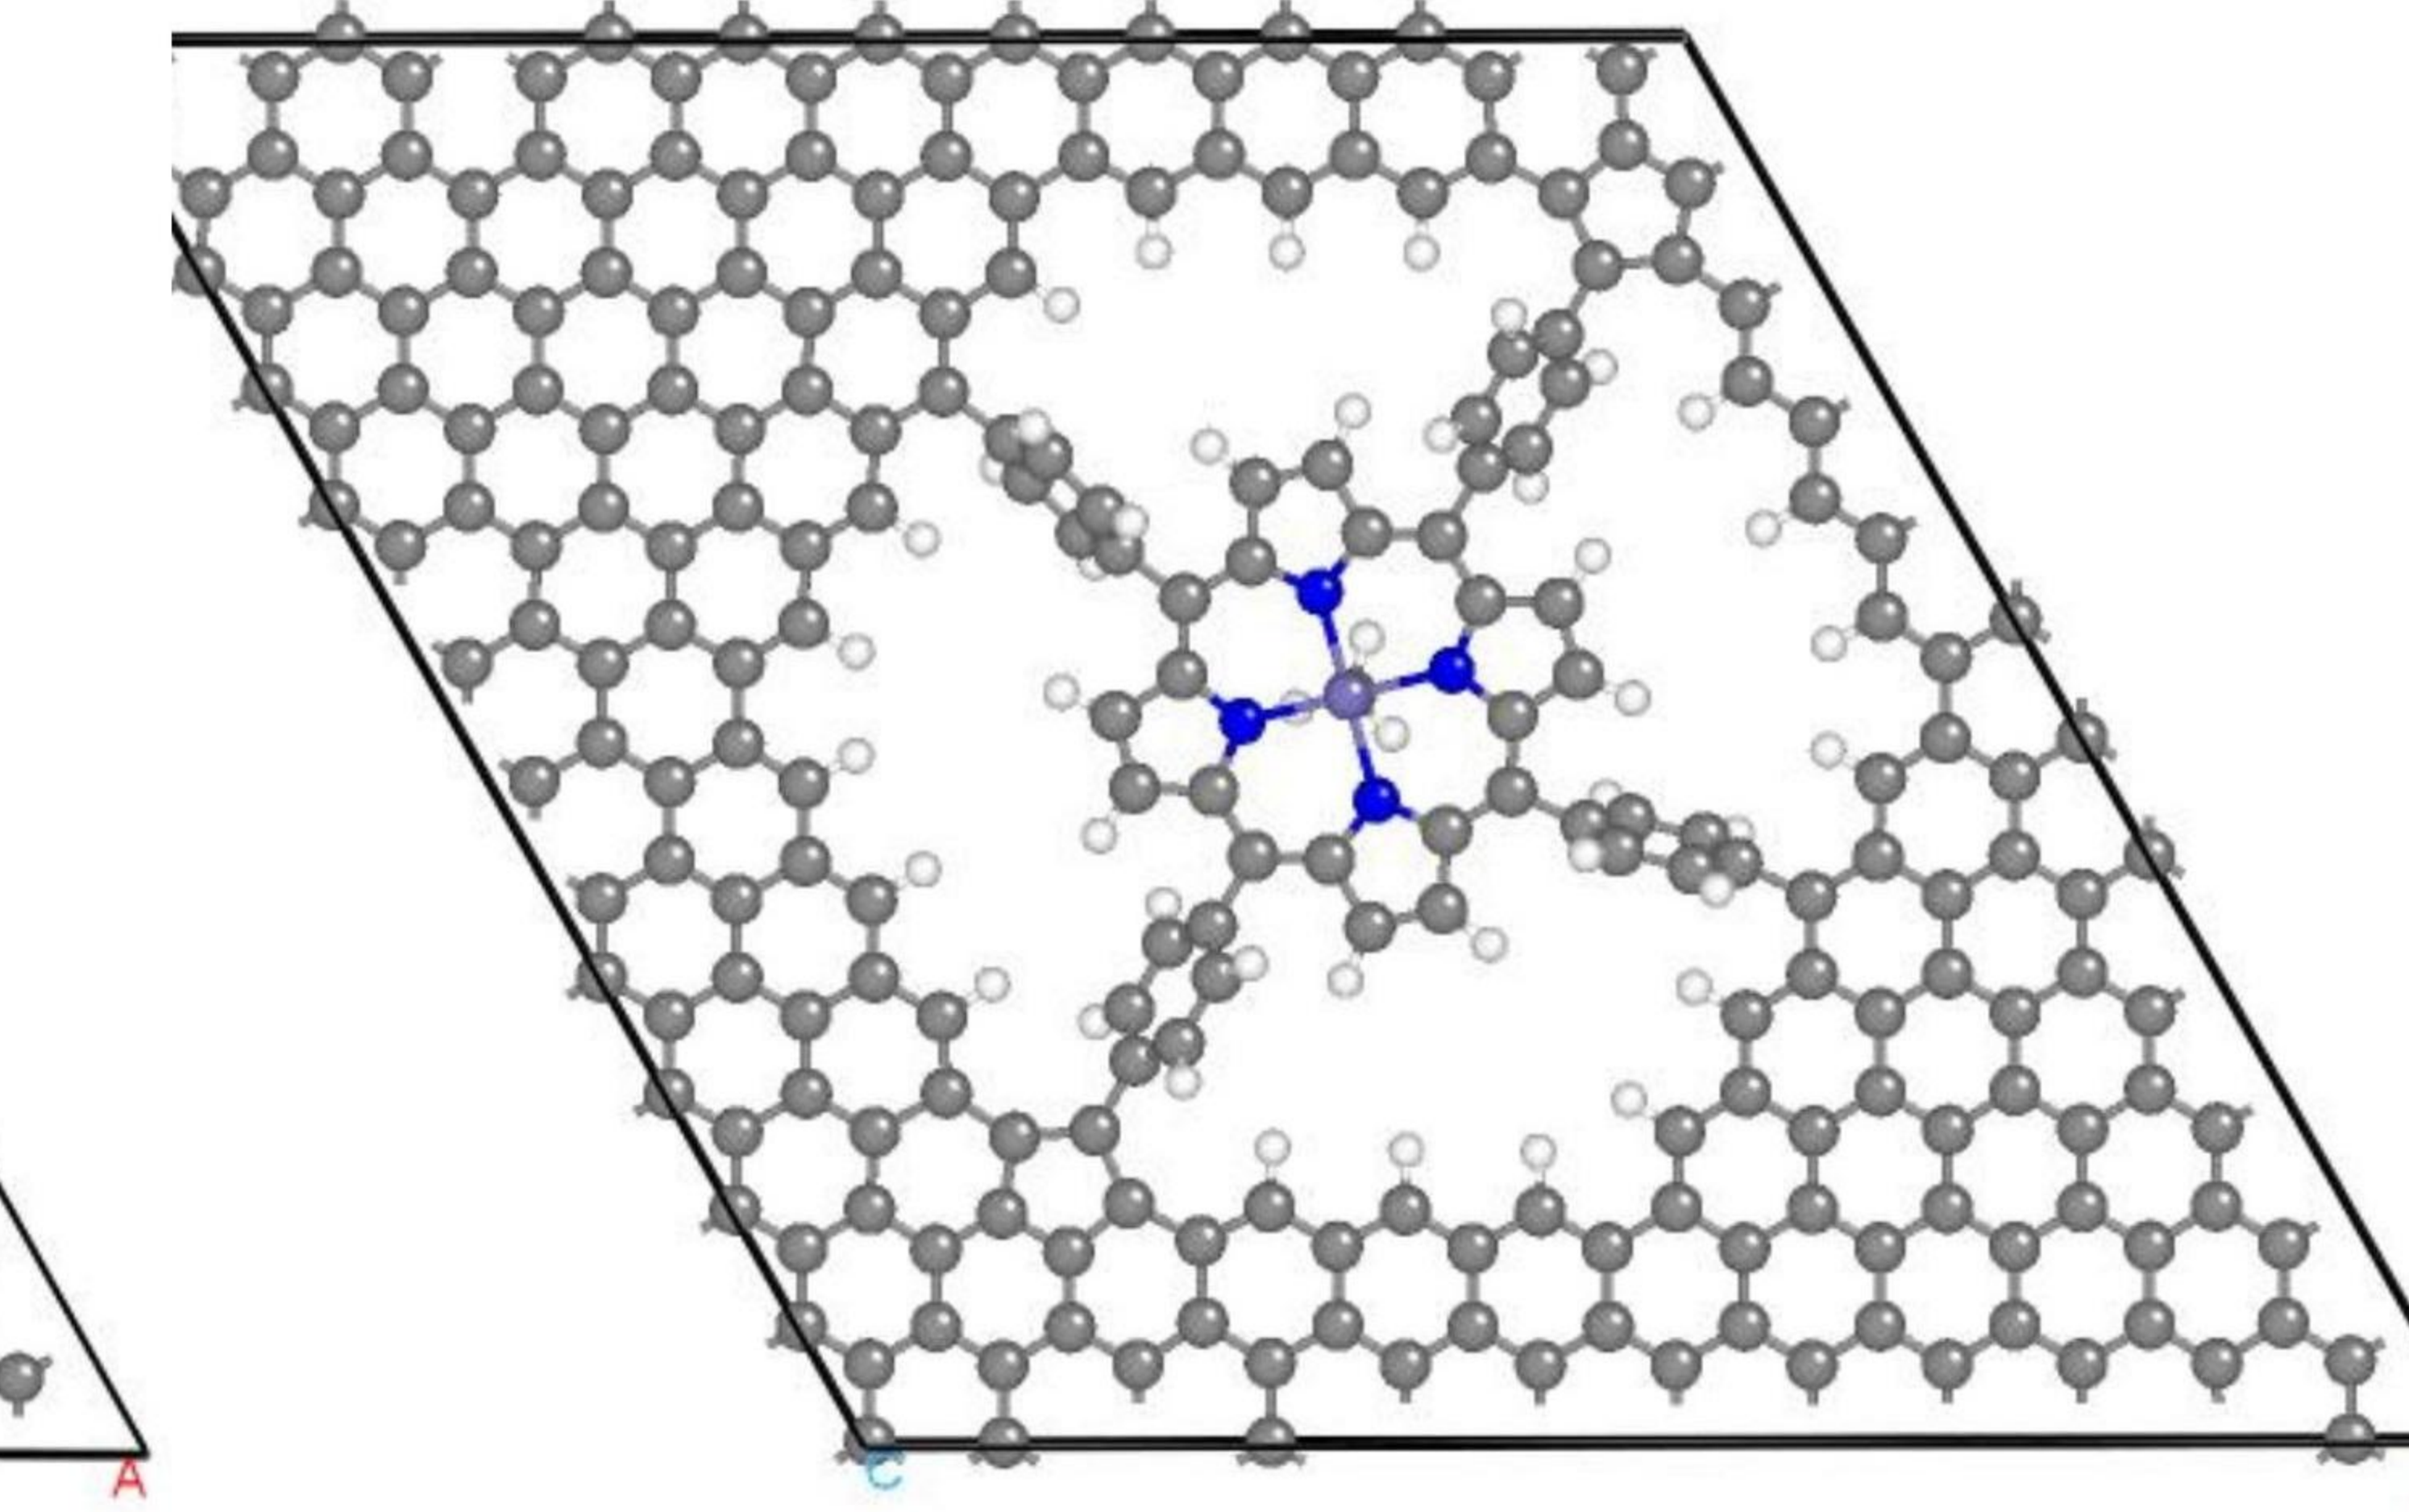

(d) Fe-TCPP\_bIm\_N

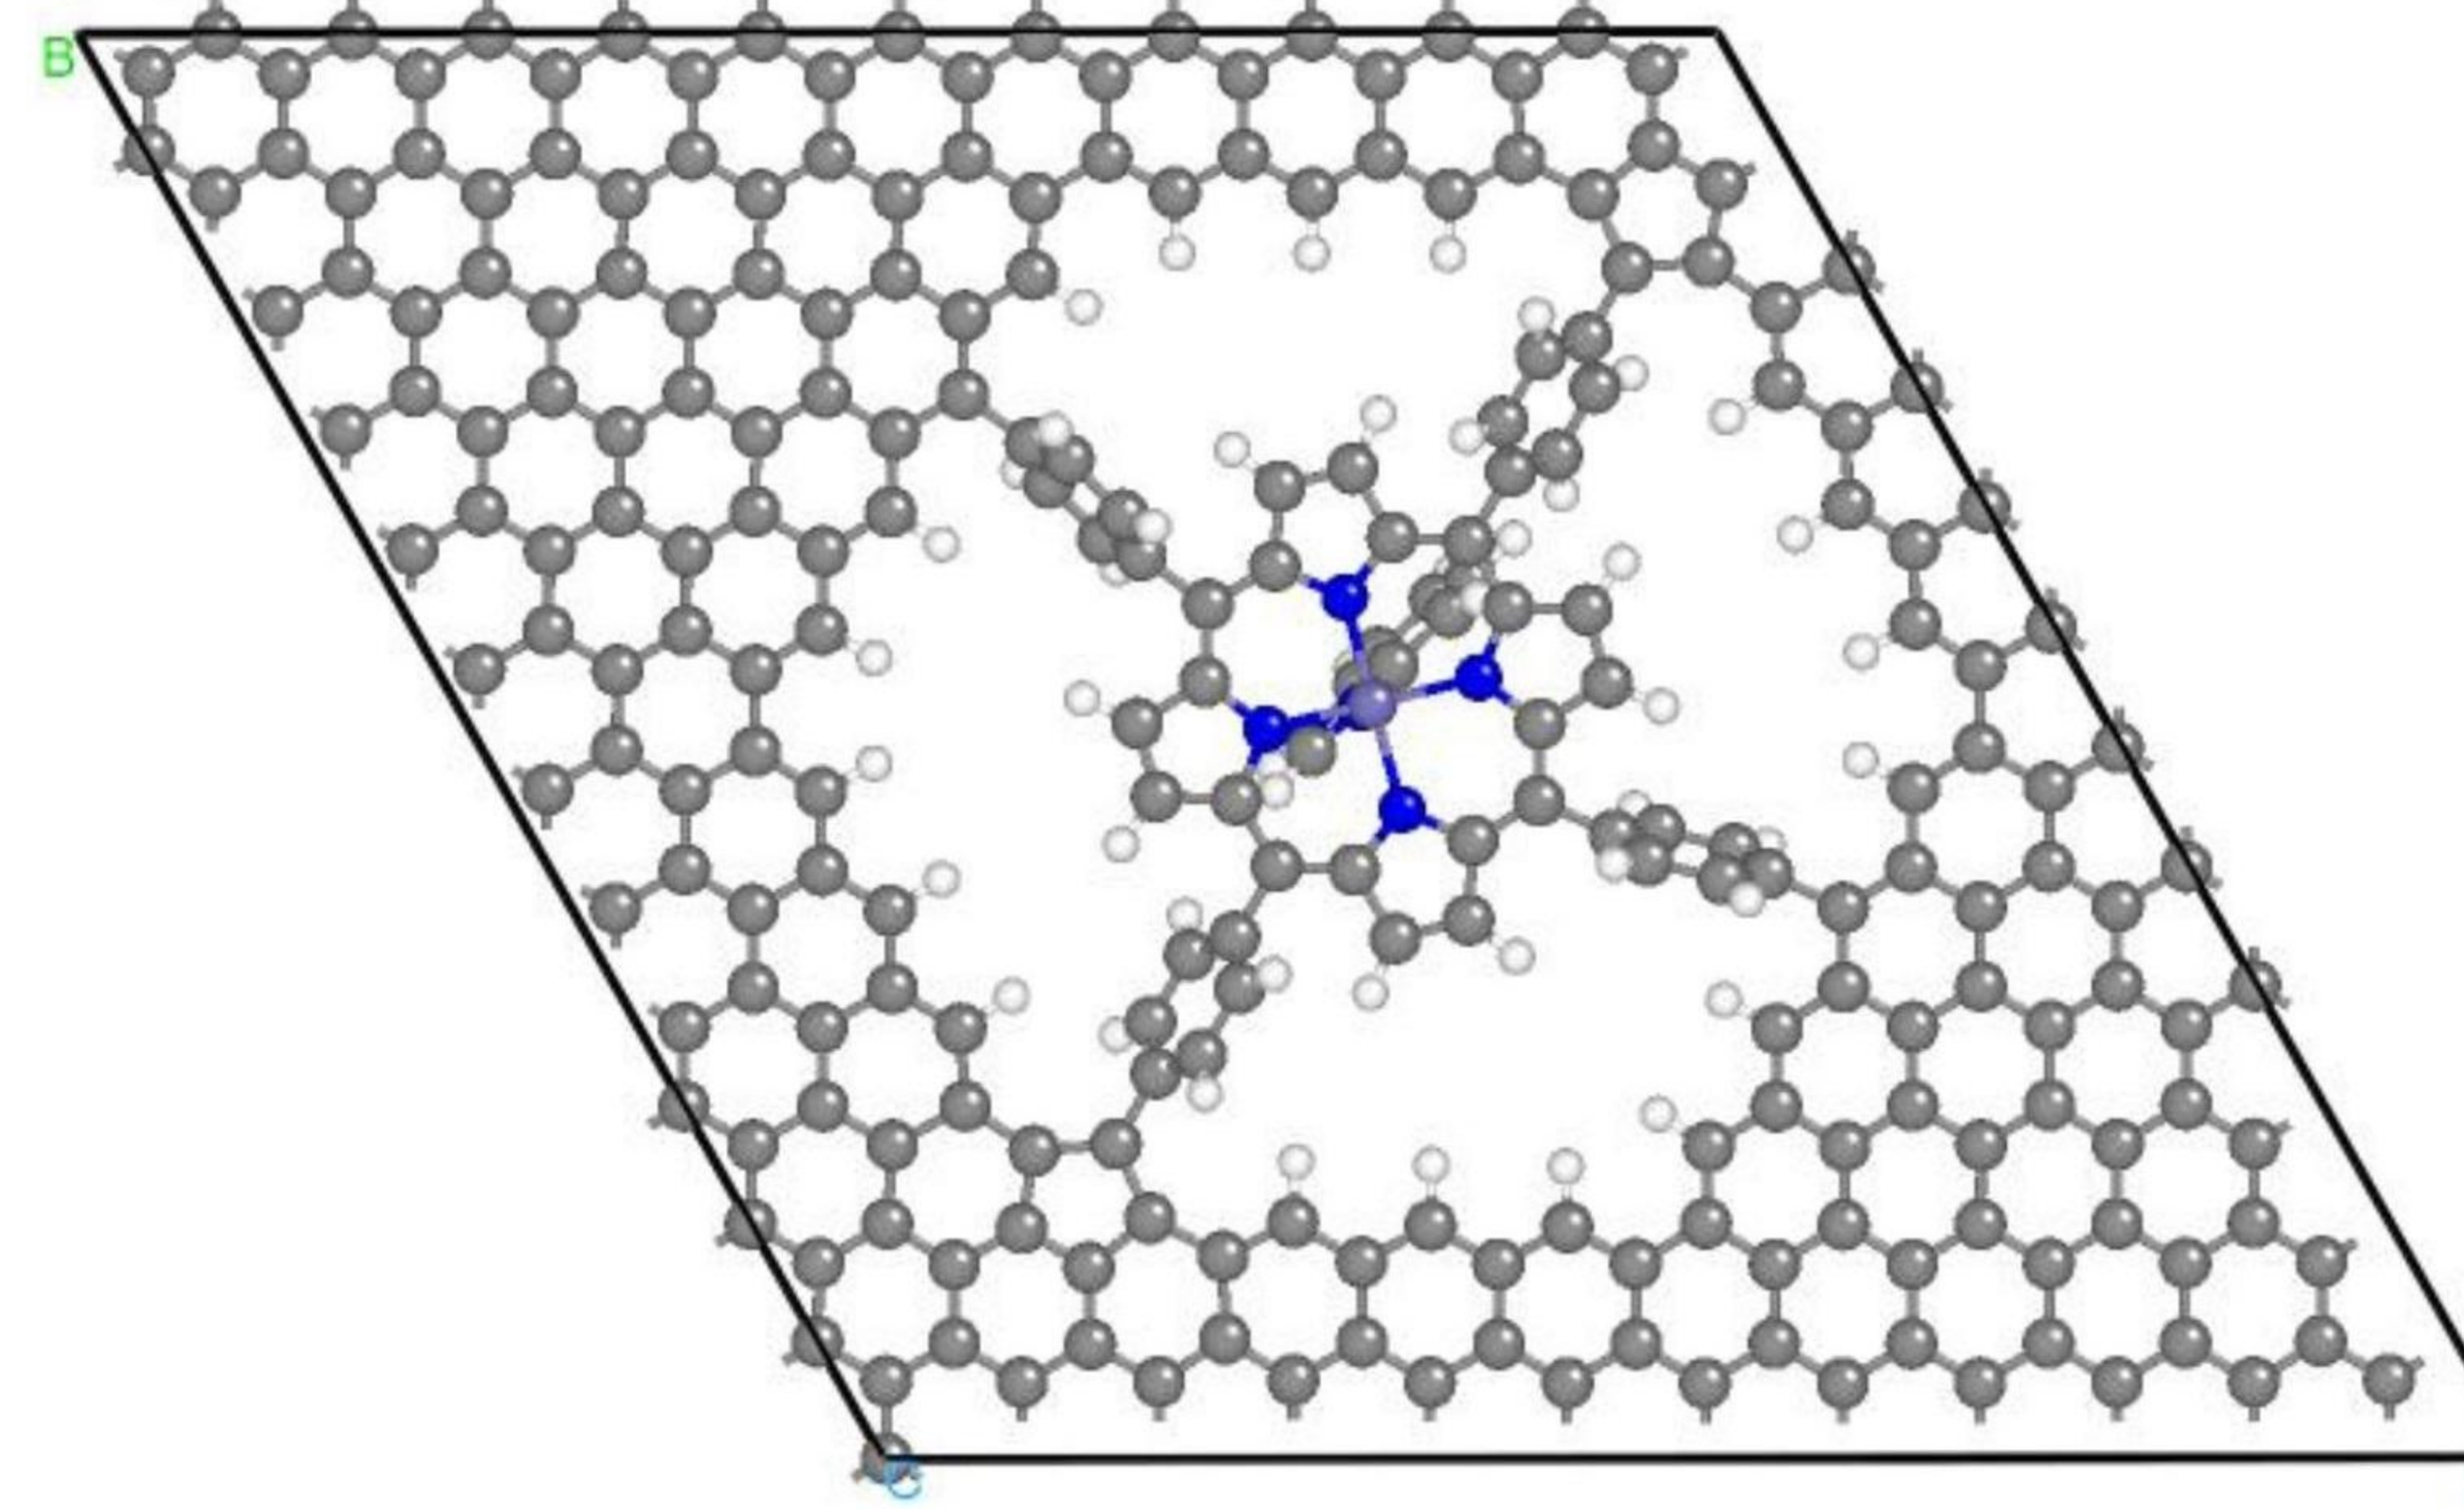

(e) Fe-TCPP\_bIm\_C

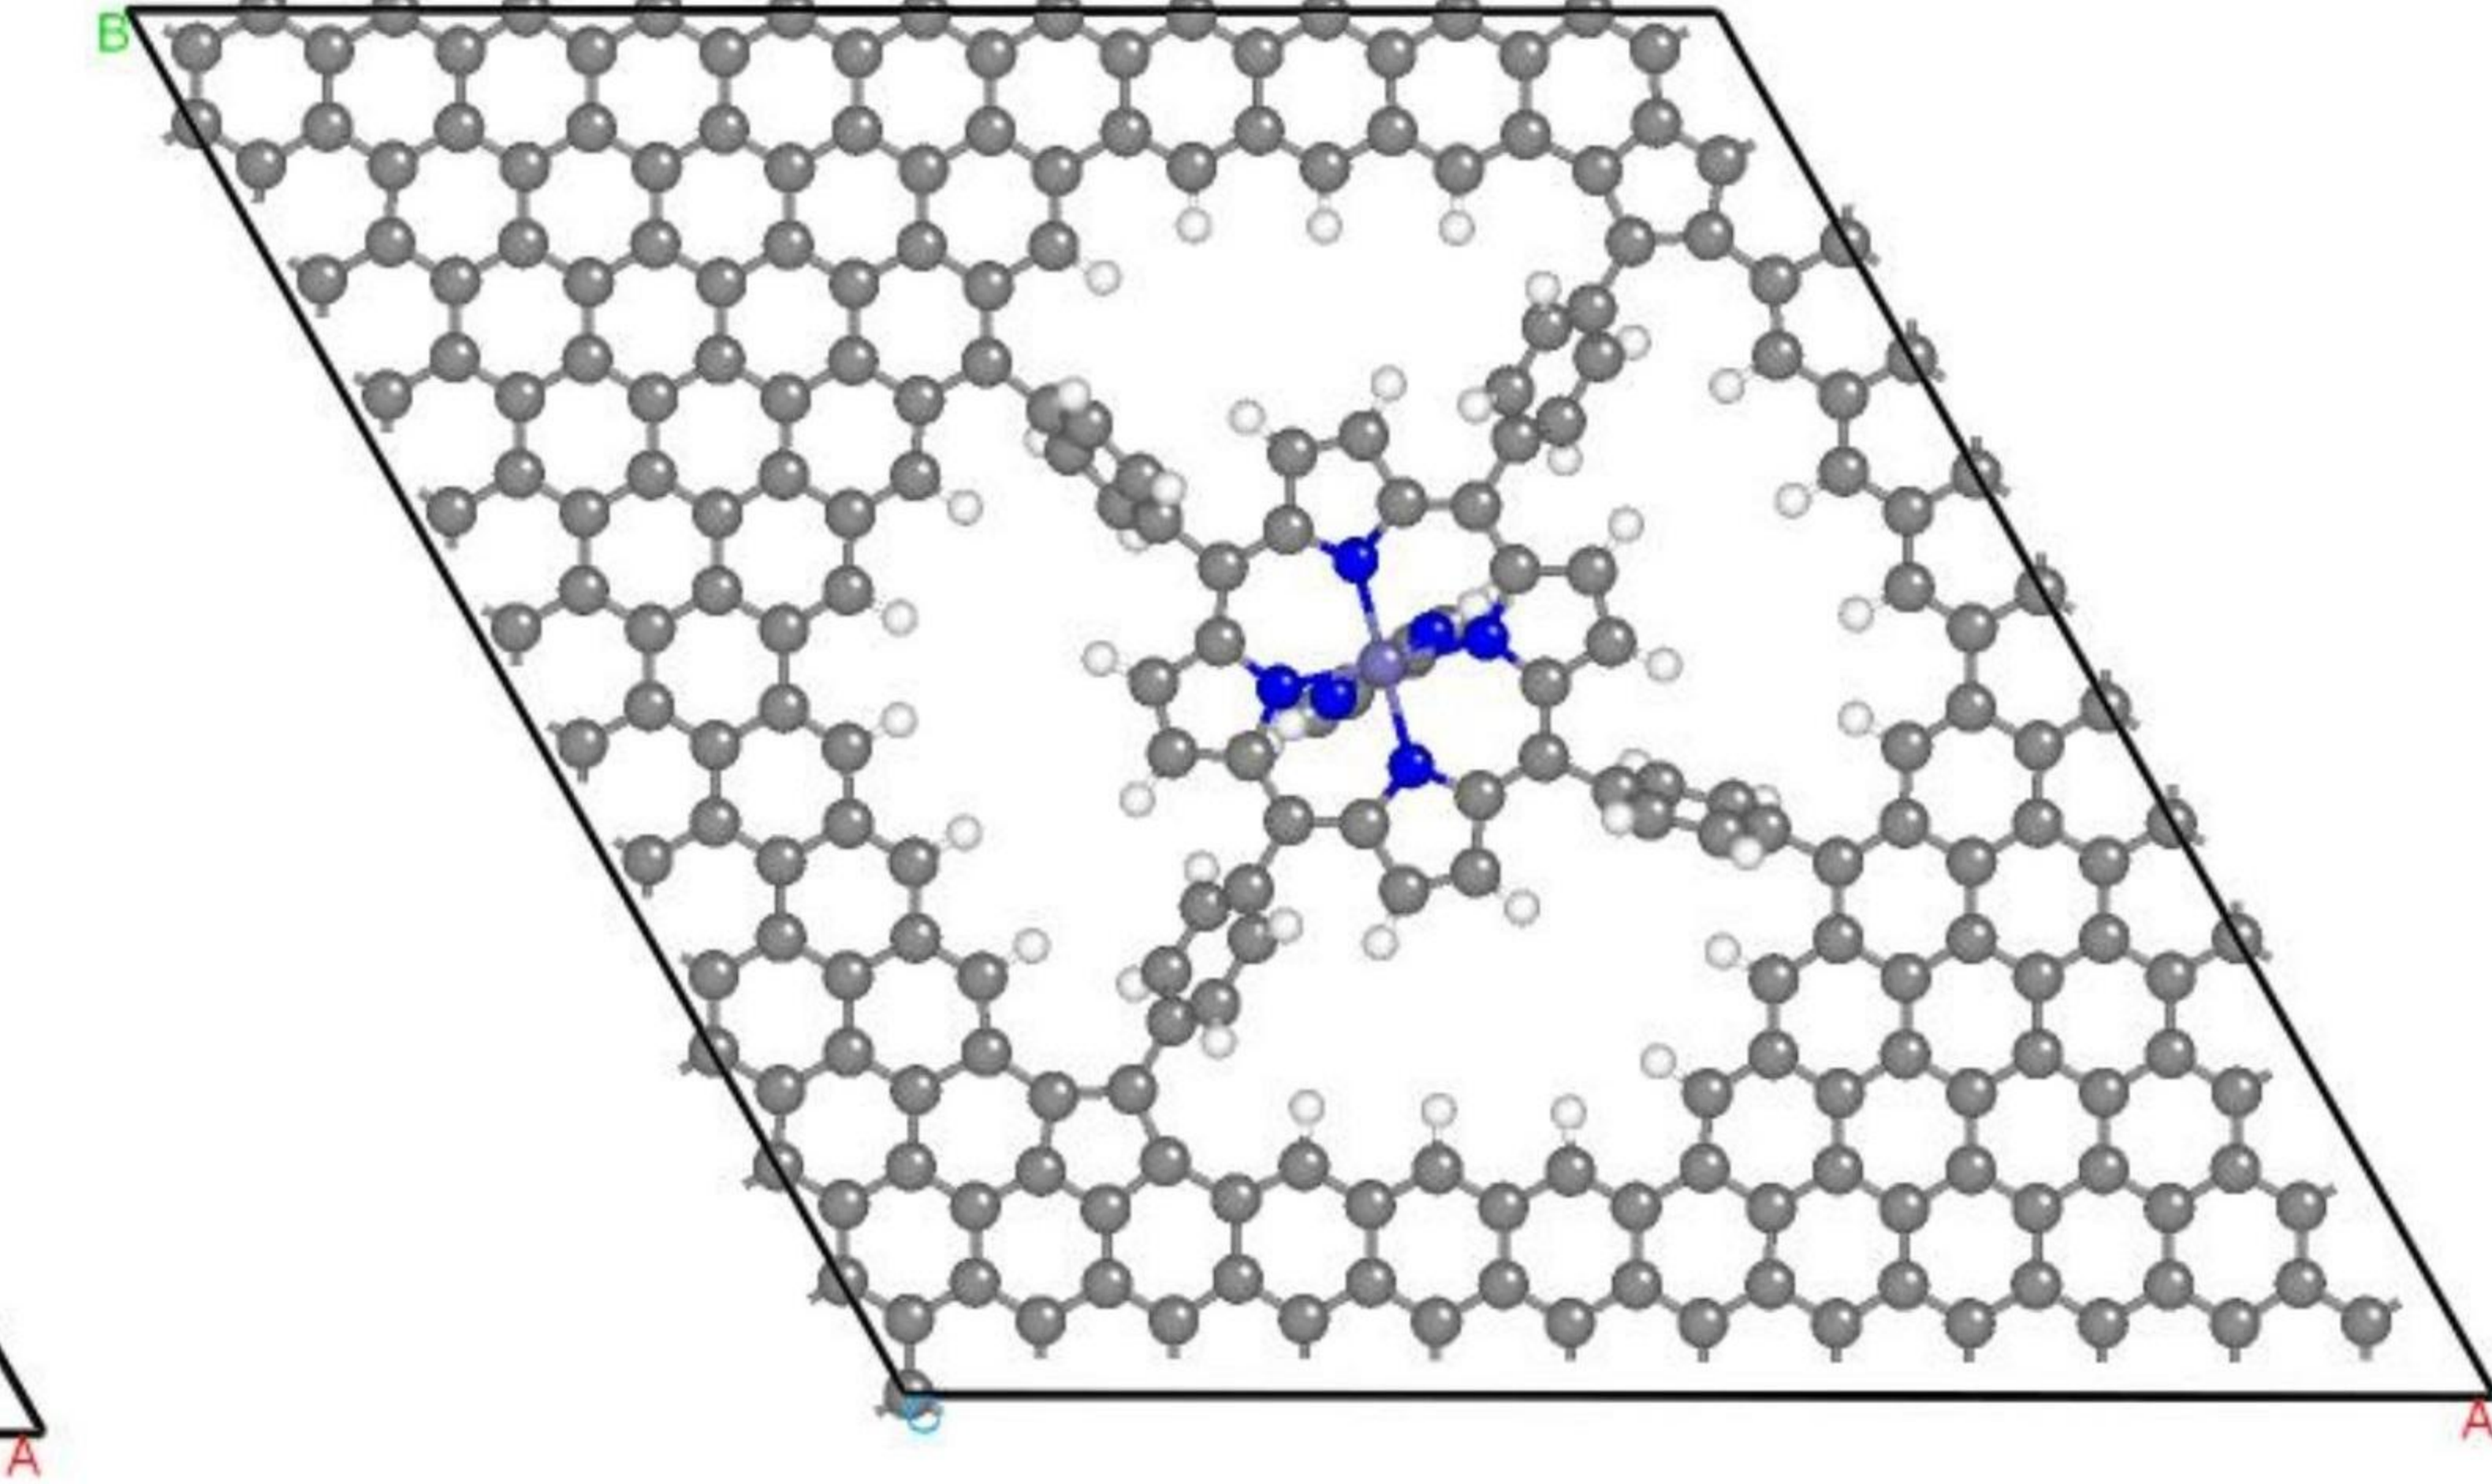

Supplement: d2cp06057d6.pdf [file d2cp06057d6.pdf]

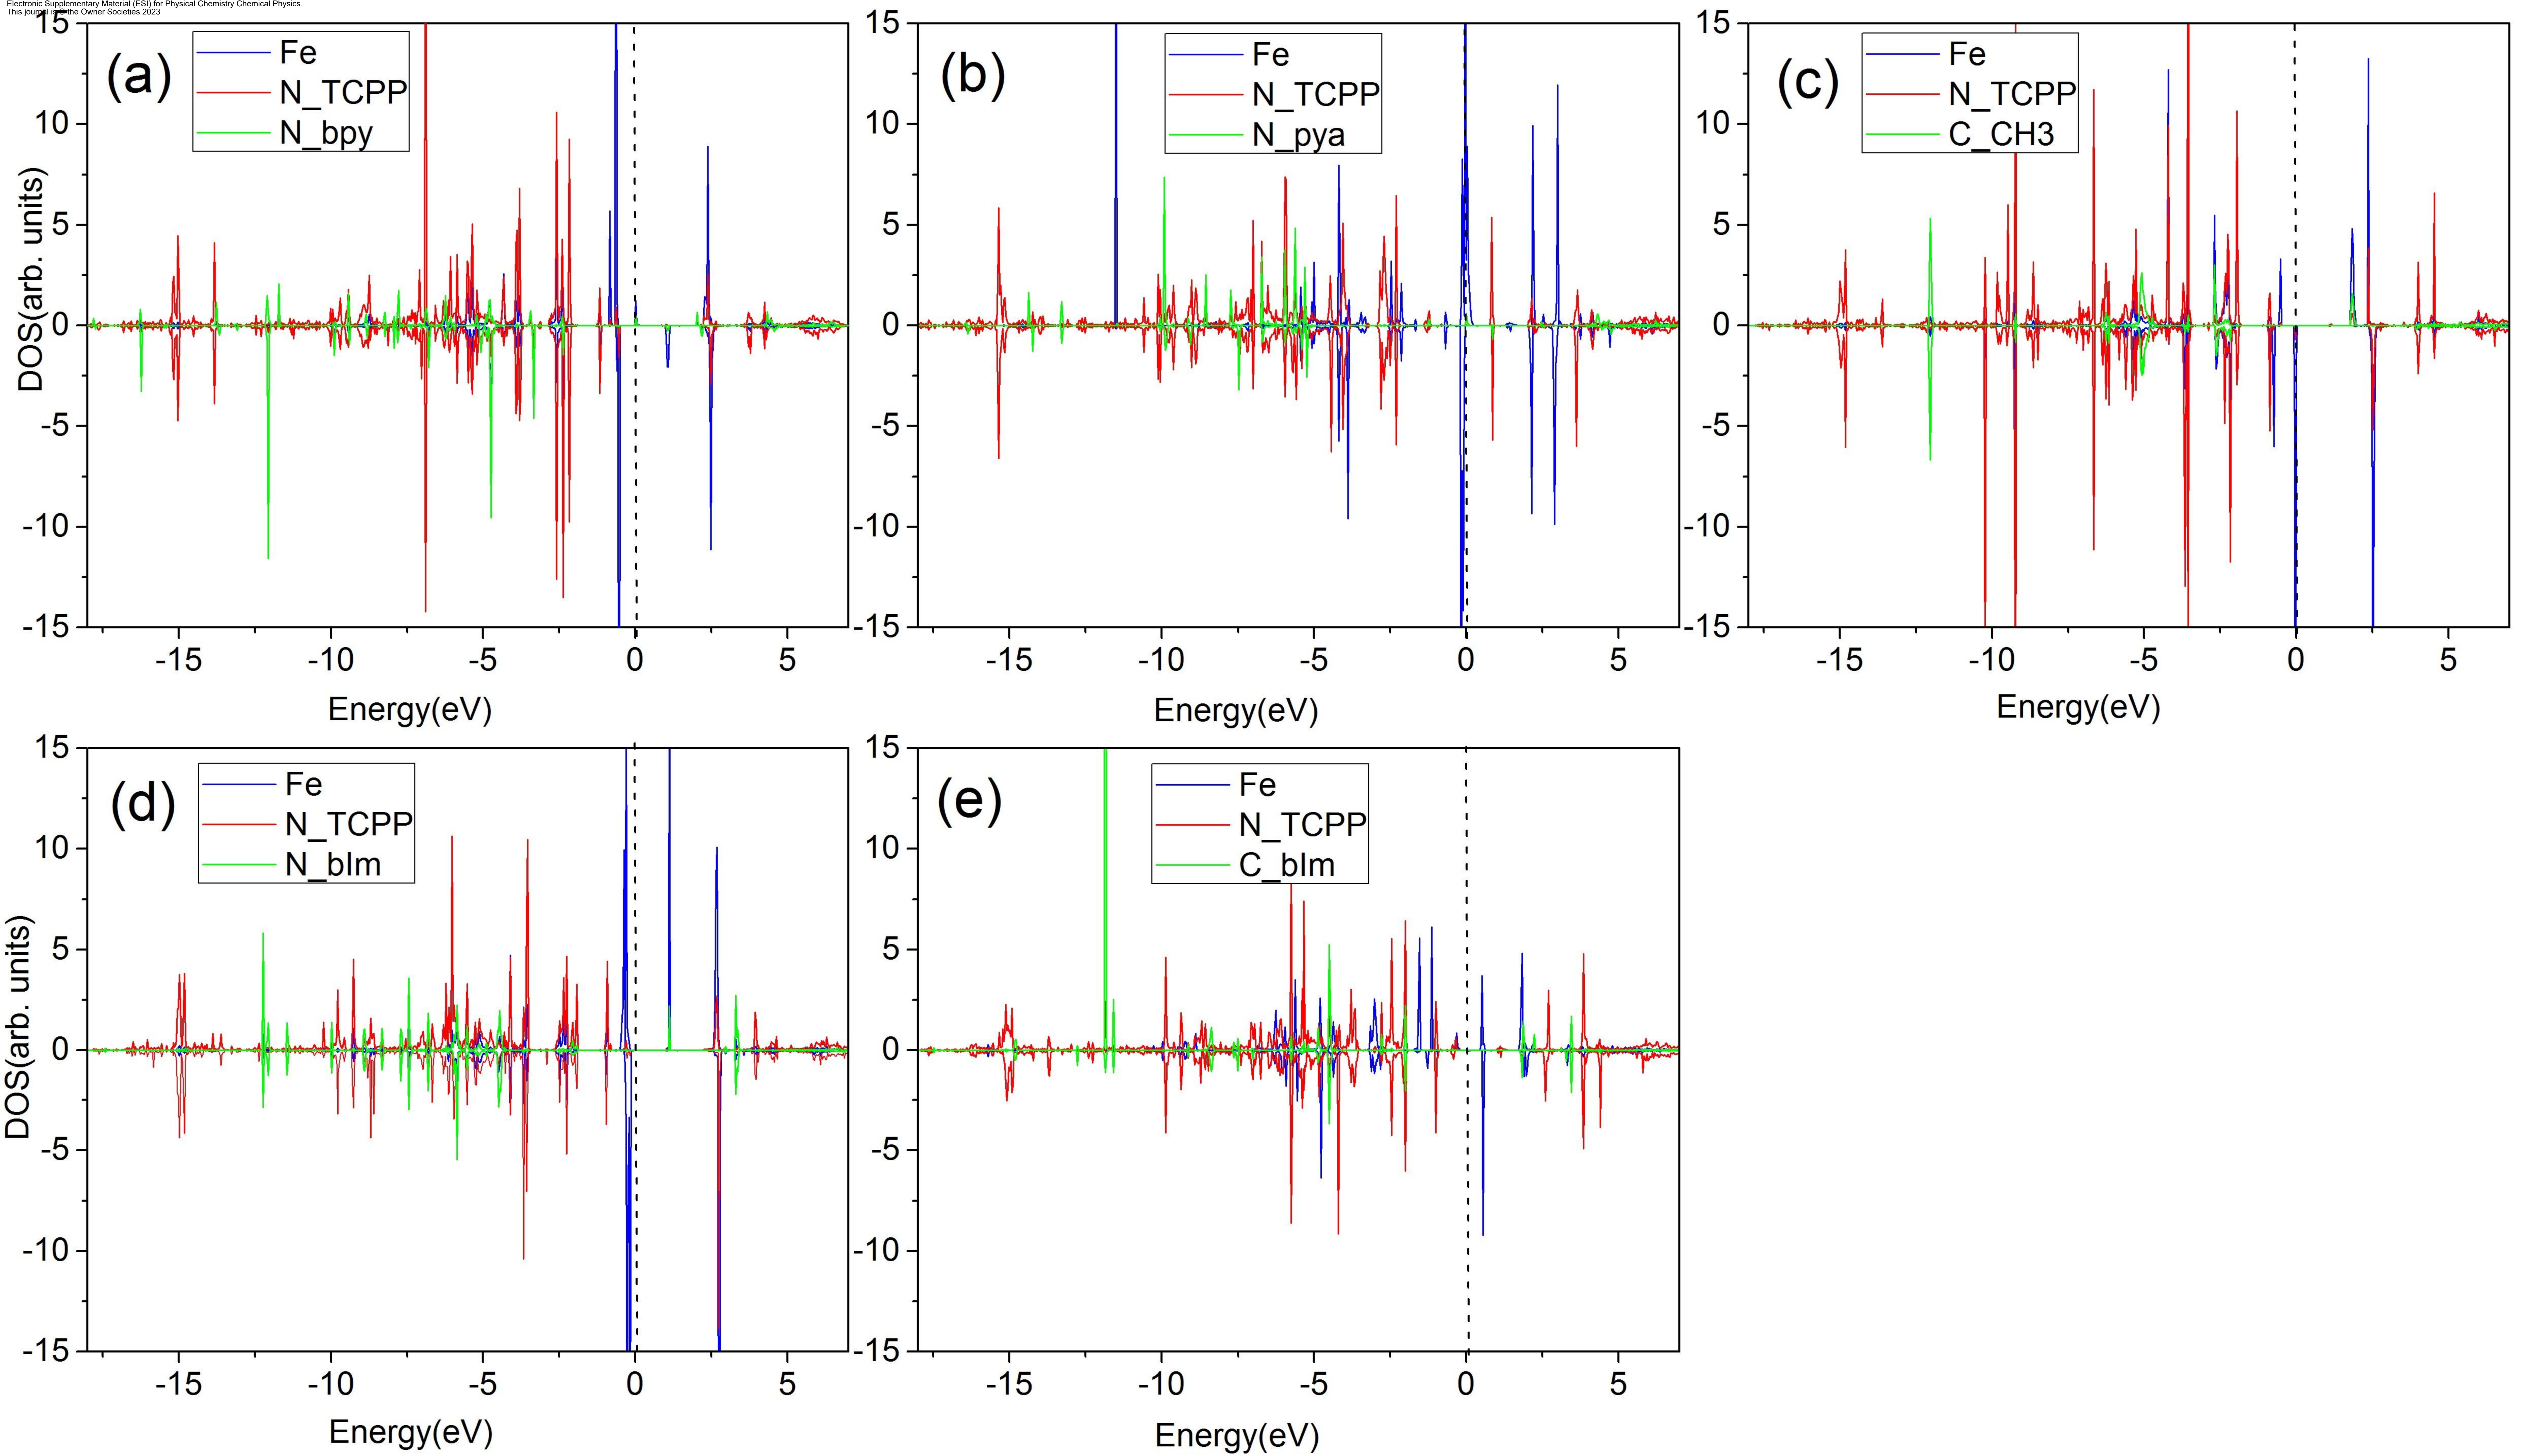

Supplement: d2cp06057d7.pdf [file d2cp06057d7.pdf]
